# Supplementary material for: Identification of Pathogenicity Loci in Magnaporthe oryzae Using GWAS with Neck Blast Phenotypic Data
Source: MDPI journal article supplement (doi:10.3390/genes13050916), 2022-05-20
Supplement: s1 [file s1]

**Table S1. Number of isolates and disease scores in six rice varieties**

| <b>Phenotype</b>            | IRBLztT   | IRBlshS   | IRBLkKA   | IRBLbB    | LTH       | IRBLz5CA  |
|-----------------------------|-----------|-----------|-----------|-----------|-----------|-----------|
|                             | DS        | DS        | DS        | DS        | DS        | DS        |
| Highly Resistant (HR)       | 26        | 43        | 65        | 38        | 30        | 53        |
| Resistant (R)               | 37        | 39        | 21        | 18        | 19        | 30        |
| Moderately Resistant (MR)   | -         | 2         | 2         | 3         | 2         | 3         |
| Moderately Susceptible (MS) | -         | -         | -         | -         | -         | -         |
| Susceptible (S)             | 1         | -         | -         | -         | -         | 3         |
| Highly Susceptible (HS)     | 26        | 6         | 8         | 25        | 33        | 3         |
| <b>Total</b>                | <b>90</b> | <b>90</b> | <b>96</b> | <b>85</b> | <b>84</b> | <b>91</b> |

**Table S2. Disease reaction data for six rice varieties of individual blast fungal isolate**

| Isolates   | Region    | IRBLkKA | IRBLztT | IRBLshS | IRBlz5CA | LTH | IRBLbB |
|------------|-----------|---------|---------|---------|----------|-----|--------|
| B1-2       | Northeast | MR      | HS      | HS      | HR       | HR  | R      |
| BAG2-4     | Northeast | HR      | HS      | R       | HR       | R   | HS     |
| BAG44-2    | Northeast | HR      | HR      | HR      | HR       | R   | HR     |
| BKK55003   | Central   | R       | R       | HR      | HR       | R   | S      |
| BLAST4     | North     | HR      | R       | HR      | -        | HR  | HR     |
| BRM60002-1 | Northeast | R       | HS      | HR      | R        | HS  | HS     |
| BRM60007-1 | Northeast | R       | HR      | R       | HR       | HS  | HS     |
| BRM60009-1 | Northeast | HR      | HR      | HR      | R        | MR  | HS     |
| CCO56003   | East      | HR      | R       | R       | S        | R   | HS     |
| CCO56004   | East      | R       | HS      | HR      | HR       | HR  | HS     |
| CRI59005   | North     | HR      | HR      | HR      | HR       | HS  | HR     |
| CRI60001-1 | North     | -       | HR      | R       | -        | -   | -      |
| CRI60003-2 | North     | HR      | -       | -       | -        | HR  | HR     |
| CRI60004-1 | North     | HR      | R       | HR      | HR       | HS  | HR     |
| KBI60001   | South     | HR      | HR      | R       | HR       | HR  | HR     |
| KKN61006   | Northeast | HR      | HS      | HR      | R        | R   | HS     |
| LBR59001   | Central   | HR      | HR      | R       | R        | -   | -      |
| LRI59003-3 | Central   | HR      | HS      | MR      | HR       | R   | HS     |
| MKM61003   | Northeast | HR      | HS      | R       | HR       | R   | R      |
| MSN60005-1 | North     | HR      | HR      | HR      | HR       | HS  | HR     |
| MSN60015   | North     | R       | R       | R       | R        | R   | R      |
| NBP60003-1 | Northeast | HR      | HS      | R       | R        | R   | R      |
| NBP6001    | Northeast | HR      | HS      | HR      | HR       | R   | HR     |
| NPM61001   | Northeast | HR      | HS      | HR      | R        | HR  | HS     |
| NRT60001   | South     | -       | -       | -       | R        | HS  | HS     |
| NRT60002   | South     | MR      | HS      | HS      | R        | R   | HS     |
| PCT61003   | Central   | HR      | R       | HR      | R        | HS  | HS     |
| PL6007     | South     | HR      | R       | R       | R        | HS  | HR     |

|            |           |    |    |    |    |    |    |
|------------|-----------|----|----|----|----|----|----|
| PNB59001-1 | Central   | HR | R  | R  | HS | HS | HS |
| PNB59003-3 | Central   | HS | HS | HS | R  | HR | R  |
| PRE59008-1 | North     | HR | HS | R  | HR | R  | HR |
| PRI57004   | East      | R  | R  | R  | R  | HS | R  |
| PRI57014   | East      | HR | HS | HR | R  | R  | HS |
| RBR59001   | West      | -  | R  | R  | HR | HR | HS |
| SIT61004   | Central   | HR | HR | HR | HR | R  | HR |
| SKA60001   | South     | HR | R  | HR | HR | HS | HR |
| SKA6002    | South     | HR | R  | HR | HR | R  | R  |
| SKN60001-1 | Northeast | R  | R  | R  | HR | HS | HS |
| SKN60002-1 | Northeast | HR | R  | HS | HR | R  | -  |
| SKN60003   | Northeast | R  | HS | R  | R  | HR | R  |
| SKW57001   | East      | HR | R  | HR | -  | -  | -  |
| SKW57006   | East      | R  | -  | HR | S  | HS | HS |
| SKW57011   | East      | R  | HS | R  | HR | HR | HS |
| SPB60009   | Central   | HR | HR | HR | R  | R  | HS |
| SPB60012   | Central   | HR | HS | -  | HR | R  | -  |
| SRN60001   | Northeast | R  | R  | HR | R  | HS | R  |
| SRN60005-1 | Northeast | HR | HR | R  | MR | HS | HR |
| TH196031   | Northeast | HR | R  | R  | HR | HS | HR |
| TH196036   | Northeast | HS | HR | HR | HR | HR | HS |
| THL041     | Central   | HR | HS | HR | S  | -  | HR |
| THL060     | North     | HR | R  | HS | S  | HS | R  |
| THL068     | Central   | R  | HS | R  | HR | HS | HR |
| THL1008    | East      | HR | -  | HR | -  | HR | HS |
| THL1109    | South     | HR | HR | R  | HR | -  | HR |
| THL112     | Northeast | HS | HS | R  | -  | HR | HS |
| THL1126    | South     | R  | R  | R  | HR | -  | R  |
| THL138     | North     | R  | R  | R  | HR | HR | HR |
| THL143     | North     | HR | HR | HR | HR | -  | HR |

|          |           |    |    |    |    |    |    |
|----------|-----------|----|----|----|----|----|----|
| THL144   | North     | HR | HR | -  | -  | -  | -  |
| THL149   | North     | HR | HR | -  | R  | HS | HR |
| THL190   | Central   | HR | HS | R  | HR | HR | R  |
| THL208   | Central   | HR | R  | R  | MR | HS | -  |
| THL234   | Central   | HR | S  | -  | R  | -  | HR |
| THL274   | Central   | HR | HS | R  | R  | HR | R  |
| THL279   | North     | HR | R  | R  | R  | HS | R  |
| THL543-2 | Central   | HR | R  | R  | R  | HR | R  |
| THL652   | North     | HR | R  | HR | HR | HS | R  |
| THL727   | Central   | HR | R  | R  | R  | HS | HR |
| THL831   | North     | HR | R  | HR | HR | R  | HR |
| THL881   | South     | -  | R  | R  | HR | -  | R  |
| THL903   | West      | HR | R  | R  | R  | HR | HS |
| THL934   | Northeast | HR | HR | -  | -  | HR | -  |
| THL943   | Central   | HS | -  | HR | HR | MR | HS |
| THL959   | South     | HR | -  | HR | HR | HS | HR |
| THL967   | Northeast | HR | -  | -  | R  | HS | HR |
| THL972   | Northeast | HR | HR | HR | HR | HR | HR |
| THL983   | Northeast | HR | HR | HR | HR | HR | R  |
| THL992   | Central   | HR | R  | HR | HS | HS | -  |
| TRG1     | Northeast | R  | -  | R  | R  | HS | HR |
| TRG10    | North     | HS | R  | HR | R  | HS | HR |
| TRG12    | North     | HS | HS | MR | HS | -  | R  |
| TRG15    | North     | HR | R  | HR | HR | HR | HR |
| TRG17    | North     | HR | HR | HR | R  | HR | HR |
| TRG2     | Northeast | HS | HS | HS | HR | HR | HS |
| TRG20    | Northeast | HR | R  | HR | HR | HR | R  |
| TRG26    | North     | R  | HR | R  | HR | HR | HR |
| TRG30    | Central   | R  | HR | R  | -  | HR | HR |
| TRG34    | Central   | R  | HR | HR | HR | HS | R  |

|                  |           |    |    |    |    |    |    |
|------------------|-----------|----|----|----|----|----|----|
| TRG36            | Central   | HR | R  | HR | HR | HS | HR |
| TRG38            | North     | HR | HR | -  | HR | HS | HR |
| TRG41            | North     | HR | -  | HR | HR | -  | -  |
| TRG43            | West      | HR | R  | HR | -  | -  | HR |
| TRG44            | Central   | -  | -  | -  | HR | -  | -  |
| TRG47            | Northeast | R  | HR | HR | HR | HS | HR |
| TRG5             | North     | HR | HS | R  | HR | HR | HR |
| TRG8             | North     | HS | R  | R  | -  | -  | HR |
| UDN60001.1       | Northeast | -  | -  | -  | HR | -  | -  |
| UDN60003-2       | Northeast | R  | HS | R  | -  | -  | -  |
| UTD17002         | North     | HR | -  | -  | -  | -  | HR |
| UTI61007         | Central   | HR | HR | HR | HR | HR | -  |
| YST61004         | Northeast | HR | R  | HR | HR | HR | -  |
| phitsanulok-40-4 | Central   | R  | R  | R  | R  | HS | R  |

Table S3. Linkage disequilibrium decay

| Distance<br>(bp) | Linkage Disequilibrium ( $r^2$ ) |        |        |        |        |        |        |        |
|------------------|----------------------------------|--------|--------|--------|--------|--------|--------|--------|
|                  | Mean                             | Chr1   | Chr2   | Chr3   | Chr4   | Chr5   | Chr6   | Chr7   |
| 10               | 0.7147                           | 0.6877 | 0.7888 | 0.7299 | 0.6107 | 0.7392 | 0.6921 | 0.6847 |
| 20               | 0.6007                           | 0.5728 | 0.6663 | 0.6423 | 0.5331 | 0.6163 | 0.5763 | 0.5318 |
| 30               | 0.5339                           | 0.5112 | 0.5862 | 0.6021 | 0.4651 | 0.5496 | 0.4924 | 0.5023 |
| 40               | 0.4867                           | 0.4615 | 0.5455 | 0.5543 | 0.4184 | 0.5037 | 0.4464 | 0.3926 |
| 50               | 0.4384                           | 0.4181 | 0.5003 | 0.5307 | 0.3469 | 0.4402 | 0.3927 | 0.3240 |
| 60               | 0.4153                           | 0.4087 | 0.4679 | 0.5269 | 0.3276 | 0.4124 | 0.3366 | 0.2953 |
| 70               | 0.3809                           | 0.3679 | 0.4341 | 0.4844 | 0.3010 | 0.3776 | 0.3157 | 0.2671 |
| 80               | 0.3625                           | 0.3474 | 0.4163 | 0.4908 | 0.2793 | 0.3493 | 0.2819 | 0.2376 |
| 90               | 0.3489                           | 0.3328 | 0.4076 | 0.4828 | 0.2825 | 0.3339 | 0.2755 | 0.2100 |
| 100              | 0.3343                           | 0.3149 | 0.3959 | 0.4560 | 0.2929 | 0.3237 | 0.2560 | 0.2322 |
| 30000            | 0.1092                           | 0.0874 | 0.1758 | 0.1534 | 0.0911 | 0.1022 | 0.0653 | 0.0998 |
| 60000            | 0.0539                           | 0.0395 | 0.0889 | 0.0600 | 0.0441 | 0.0323 | 0.0413 | 0.0719 |
| 90000            | 0.0464                           | 0.0471 | 0.0654 | 0.0301 | 0.0754 | 0.0252 | 0.0441 | 0.0611 |
| 120000           | 0.0487                           | 0.0488 | 0.0472 | 0.0509 | 0.0480 | 0.0418 | 0.0495 | 0.0682 |
| 150000           | 0.0570                           | 0.0611 | 0.0419 | 0.0524 | 0.0645 | 0.0402 | 0.0562 | 0.0981 |
| 180000           | 0.0457                           | 0.0438 | 0.0585 | 0.0515 | 0.0693 | 0.0611 | 0.0427 | 0.0870 |
| 210000           | 0.0401                           | 0.0351 | 0.0533 | 0.0514 | 0.0501 | 0.0516 | 0.0494 | 0.0719 |
| 240000           | 0.0483                           | 0.0471 | 0.0557 | 0.0446 | 0.0679 | 0.0478 | 0.0486 | 0.0430 |
| 270000           | 0.0489                           | 0.0468 | 0.0462 | 0.0540 | 0.0474 | 0.0705 | 0.0462 | 0.0835 |
| 300000           | 0.0521                           | 0.0416 | 0.0591 | 0.0548 | 0.0729 | 0.0730 | 0.0628 | 0.0750 |
| 330000           | 0.0445                           | 0.0323 | 0.0656 | 0.0629 | 0.0564 | 0.0932 | 0.0559 | 0.0882 |
| 360000           | 0.0426                           | 0.0319 | 0.0671 | 0.0591 | 0.0670 | 0.1094 | 0.0479 | 0.0855 |
| 390000           | 0.0455                           | 0.0372 | 0.0722 | 0.0541 | 0.0566 | 0.0794 | 0.0488 | 0.0723 |
| 420000           | 0.0461                           | 0.0429 | 0.0457 | 0.0425 | 0.0853 | 0.0723 | 0.0515 | 0.0813 |
| 450000           | 0.0438                           | 0.0368 | 0.0678 | 0.0399 | 0.0779 | 0.0645 | 0.0535 | 0.0620 |
| 480000           | 0.0430                           | 0.0342 | 0.0560 | 0.0391 | 0.0554 | 0.0693 | 0.0549 | 0.0927 |
| 510000           | 0.0380                           | 0.0353 | 0.0305 | 0.0365 | 0.0779 | 0.0601 | 0.0566 | 0.0496 |
| 540000           | 0.0462                           | 0.0419 | 0.0400 | 0.0665 | 0.0463 | 0.0752 | 0.0613 | 0.0569 |
| 570000           | 0.0404                           | 0.0448 | 0.0294 | 0.0450 | 0.0507 | 0.0582 | 0.0380 | 0.0996 |
| 600000           | 0.0350                           | 0.0300 | 0.0355 | 0.0528 | 0.0527 | 0.0488 | 0.0380 | 0.0901 |
| 630000           | 0.0309                           | 0.0285 | 0.0273 | 0.0468 | 0.0630 | 0.0341 | 0.0441 | 0.0949 |
| 660000           | 0.0310                           | 0.0287 | 0.0287 | 0.0475 | 0.0508 | 0.0270 | 0.0428 | 0.0875 |
| 690000           | 0.0385                           | 0.0354 | 0.0347 | 0.0438 | 0.0549 | 0.0512 | 0.0619 | 0.0684 |
| 720000           | 0.0442                           | 0.0368 | 0.0455 | 0.0719 | 0.0677 | 0.0391 | 0.0479 | 0.0787 |
| 750000           | 0.0550                           | 0.0490 | 0.0575 | 0.0862 | 0.0761 | 0.0510 | 0.0504 | 0.1039 |
| 780000           | 0.0461                           | 0.0348 | 0.0809 | 0.0733 | 0.0831 | 0.0466 | 0.0443 | 0.0723 |
| 810000           | 0.0396                           | 0.0310 | 0.0819 | 0.0729 | 0.0598 | 0.0669 | 0.0417 | 0.1061 |
| 840000           | 0.0442                           | 0.0345 | 0.0957 | 0.0727 | 0.0774 | 0.0289 | 0.0514 | 0.1066 |
| 870000           | 0.0434                           | 0.0325 | 0.0838 | 0.0597 | 0.0788 | 0.0358 | 0.0627 | 0.1025 |
| 900000           | 0.0421                           | 0.0367 | 0.0831 | 0.0921 | 0.0776 | 0.0258 | 0.0752 | 0.0680 |
| 930000           | 0.0529                           | 0.0374 | 0.0892 | 0.0892 | 0.0649 | 0.0547 | 0.0842 | 0.1124 |
| 960000           | 0.0451                           | 0.0312 | 0.0949 | 0.0687 | 0.0544 | 0.1861 | 0.0745 | 0.0624 |
| 990000           | 0.0395                           | 0.0290 | 0.0862 | 0.0701 | 0.0528 | 0.0967 | 0.0616 | 0.0535 |
| 1020000          | 0.0363                           | 0.0280 | 0.0792 | 0.0725 | 0.0632 | 0.1082 | 0.0750 | 0.0624 |

Table S5. SNP IDs after passing each analyzing process

| Trait    | Block<br>multi. regression | Trait<br>multi. regression |
|----------|----------------------------|----------------------------|
| IRBLztT  | MG3-322529                 | MG3-322529 (12%)           |
| IRBLshS  | MG1-7553101                |                            |
|          | MG2-7171094                | MG2-7171094 (18%)          |
|          | MG1-5731374                |                            |
|          | MG2-2428572                | MG2-2428572 (23%)          |
|          | MG2-2428518                |                            |
|          | MG2-2406970                |                            |
|          | MG1-7876964                |                            |
|          | MG3-254639                 | MG3-254639 (13%)           |
|          | MG4-586828                 | MG4-586828 (15%)           |
|          | MG5-4455619                |                            |
| IRBLkKA  | MG7-2400798                |                            |
|          | MG1-425230                 | MG1-425230 (21%)           |
|          | MG1-6669832                |                            |
|          | MG1-5639396                | MG1-5639396 (12%)          |
| IRBLz5CA | MG2-8137518                |                            |
|          | MG6-1316128                | MG6-1316128 (12%)          |
|          | MG3-1645410                | MG3-1645410 (28%)          |
|          | MG3-6316407                |                            |
|          | MG2-5441644                | MG2-5441644 (18%)          |
|          | MG5-54924                  |                            |
|          | MG6-957987                 | MG6-957987 (16%)           |
|          | MG6-703373                 | MG6-703373 (14%)           |
| LTH      | MG3-5461007                |                            |
|          | MG1-1250754                |                            |
|          | MG6-1068242                | MG6-1068242 (19%)          |
| IRBLbB   | MG6-3022354                | MG6-3022354 (21%)          |

Table S6. One-hundred and two isolates of *M. oryzae* collected from several locations in Thailand during year 2001-2017

| No. | Isolate    | Region in Thailand | Province            | Collected year | Source               |
|-----|------------|--------------------|---------------------|----------------|----------------------|
| 1   | B1-2       | Northeast          | Ubon Ratchathani    | 2001           | BIOTEC               |
| 2   | BAG2.4     | Northeast          | Ubon Ratchathani    | 2016           | Kasetsart University |
| 3   | BAG44.2    | Northeast          | Roi Et              | 2016           | Kasetsart University |
| 4   | BKK55003   | Central            | Bangkok             | 2012           | KMITL                |
| 5   | BLAST4     | North              | Lampang             | 2014           | RMUTL                |
| 6   | BRM60002.1 | Northeast          | Buri Ram            | 2017           | KMITL                |
| 7   | BRM60007.1 | Northeast          | Buri Ram            | 2017           | KMITL                |
| 8   | BRM60009.1 | Northeast          | Buri Ram            | 2017           | KMITL                |
| 9   | CCO56003   | East               | Chachoengsao        | 2012           | KMITL                |
| 10  | CCO56004   | East               | Chachoengsao        | 2013           | KMITL                |
| 11  | CRI59005   | North              | Chiang Rai          | 2016           | KMITL                |
| 12  | CRI60001.1 | North              | Chiang Rai          | 2017           | KMITL                |
| 13  | CRI60003.2 | North              | Chiang Rai          | 2017           | KMITL                |
| 14  | CRI60004.1 | North              | Chiang Rai          | 2017           | KMITL                |
| 15  | KBI60001   | South              | Krabi               | 2017           | KMITL                |
| 16  | KKN61006   | Northeast          | Khon Kaen           | 2018           | KMITL                |
| 17  | LBR59001   | Central            | Lopburi             | 2016           | KMITL                |
| 18  | LRI59003.3 | Central            | Lopburi             | 2016           | KMITL                |
| 19  | MKM61003   | Northeast          | Maharakham          | 2018           | KMITL                |
| 20  | MSN60005.1 | North              | Mae Hong Son        | 2017           | KMITL                |
| 21  | MSN60015   | North              | Mae Hong Son        | 2017           | KMITL                |
| 22  | NBP60001   | Northeast          | Nong Bua Lam Phu    | 2017           | KMITL                |
| 23  | NBP60003.1 | Northeast          | Nong Bua Lam Phu    | 2017           | KMITL                |
| 24  | NPM61001   | Northeast          | นครพนม              | 2018           | KMITL                |
| 25  | NRT60001   | South              | Nakhon Si Thammarat | 2017           | KMITL                |
| 26  | NRT60002   | South              | Nakhon Si Thammarat | 2017           | KMITL                |
| 27  | PCT61003   | Central            | Phichit             | 2018           | KMITL                |
| 28  | PL60007    | South              | Phatthalung         | 2017           | KMITL                |
| 29  | PNB59001.1 | Central            | Phetchabun          | 2016           | KMITL                |
| 30  | PNB59003.3 | Central            | Phetchabun          | 2016           | KMITL                |
| 31  | PRE59008.1 | North              | Phrae               | 2016           | KMITL                |
| 32  | PRI57004   | East               | Prachin Buri        | 2014           | KMITL                |
| 33  | PRI57014   | East               | Prachin Buri        | 2014           | KMITL                |
| 34  | RBR59001   | West               | Ratchaburi          | 2016           | KMITL                |
| 35  | SKA60001   | South              | Songkhla            | 2017           | KMITL                |
| 36  | SKA60002   | South              | Songkhla            | 2017           | KMITL                |



|    |            |           |                          |      |                                       |
|----|------------|-----------|--------------------------|------|---------------------------------------|
| 37 | SKN60001.1 | Northeast | Sakon Nakhon             | 2017 | KMITL                                 |
| 38 | SKN60002.1 | Northeast | Sakon Nakhon             | 2017 | KMITL                                 |
| 39 | SKN60003   | Northeast | Sakon Nakhon             | 2017 | KMITL                                 |
| 40 | SKW57001   | East      | Sa Kaeo                  | 2014 | KMITL                                 |
| 41 | SKW57006   | East      | Sa Kaeo                  | 2014 | KMITL                                 |
| 42 | SKW57011   | East      | Sa Kaeo                  | 2014 | KMITL                                 |
| 43 | SPB60009   | Central   | Suphan Buri              | 2017 | KMITL                                 |
| 44 | SPB60012   | Central   | Suphan Buri              | 2017 | KMITL                                 |
| 45 | SRN60001   | Northeast | Surin                    | 2017 | KMITL                                 |
| 46 | SRN60005.1 | Northeast | Surin                    | 2017 | KMITL                                 |
| 47 | STI61004   | Central   | Sukhothai                | 2018 | KMITL                                 |
| 48 | TH196031   | Northeast | Ubon Ratchathani         | 2001 | Ubon Ratchathani rice research center |
| 49 | TH196036   | Northeast | Ubon Ratchathani         | 2001 | Ubon Ratchathani rice research center |
| 50 | THL041     | Central   | Phitsanulok              | 2001 | BIOTEC                                |
| 51 | THL060     | North     | Chiang Mai               | 2001 | BIOTEC                                |
| 52 | THL068     | Central   | Phitsanulok              | 2001 | BIOTEC                                |
| 53 | THL112     | Northeast | Surin                    | 2001 | BIOTEC                                |
| 54 | THL138     | North     | Chiang Mai               | 2001 | BIOTEC                                |
| 55 | THL143     | North     | Chiang Mai               | 2001 | BIOTEC                                |
| 56 | THL144     | North     | Chiang Mai               | 2001 | BIOTEC                                |
| 57 | THL149     | North     | Chiang Mai               | 2001 | BIOTEC                                |
| 58 | THL190     | Central   | Phitsanulok              | 2001 | BIOTEC                                |
| 59 | THL208     | Central   | Phitsanulok              | 2001 | BIOTEC                                |
| 60 | THL234     | Central   | Pathum Thani             | 2001 | BIOTEC                                |
| 61 | THL274     | Central   | Chai Nat                 | 2001 | BIOTEC                                |
| 62 | THL279     | North     | Phrae                    | 2001 | BIOTEC                                |
| 63 | THL543-2   | Central   | Phetchabun               | 2001 | BIOTEC                                |
| 64 | THL652     | North     | Chiang Mai               | 2001 | BIOTEC                                |
| 65 | THL727     | Central   | Pathum Thani             | 2001 | BIOTEC                                |
| 66 | THL831     | North     | Mae Hong Son             | 2001 | BIOTEC                                |
| 67 | THL881     | South     | Chumphon                 | 2001 | BIOTEC                                |
| 68 | THL903     | West      | Ratchaburi               | 2001 | BIOTEC                                |
| 69 | THL934     | Northeast | Nong Khai                | 2001 | BIOTEC                                |
| 70 | THL943     | Central   | Phra Nakhon Si Ayutthaya | 2001 | BIOTEC                                |
| 71 | THL959     | South     | Phatthalung              | 2001 | BIOTEC                                |
| 72 | THL967     | Northeast | Surin                    | 2001 | BIOTEC                                |
| 73 | THL972     | Northeast | Khon Kaen                | 2001 | BIOTEC                                |
| 74 | THL983     | Northeast | Nong Khai                | 2001 | BIOTEC                                |

|     |              |           |                             |      |        |
|-----|--------------|-----------|-----------------------------|------|--------|
| 75  | THL992       | Central   | Pathum Thani                | 2001 | BIOTEC |
| 76  | THL1008      | East      | Trat                        | 2001 | BIOTEC |
| 77  | THL1109      | South     | Krabi                       | 2001 | BIOTEC |
| 78  | THL1126      | South     | Phuket                      | 2001 | BIOTEC |
| 79  | TRG1         | Northeast | Nong Khai                   | 2013 | BIOTEC |
| 80  | TRG2         | Northeast | Nong Khai                   | 2013 | BIOTEC |
| 81  | TRG5         | North     | Lampang                     | 2014 | BIOTEC |
| 82  | TRG8         | North     | Nan                         | 2014 | BIOTEC |
| 83  | TRG10        | North     | Nan                         | 2014 | BIOTEC |
| 84  | TRG12        | North     | Nan                         | 2014 | BIOTEC |
| 85  | TRG15        | North     | Lampang                     | 2014 | BIOTEC |
| 86  | TRG17        | North     | Lampang                     | 2014 | BIOTEC |
| 87  | TRG20        | Northeast | Sakon Nakhon                | 2558 | BIOTEC |
| 88  | TRG26        | North     | Phayao                      | 2558 | BIOTEC |
| 89  | TRG30        | Central   | Nakhon Pathom               | 2016 | BIOTEC |
| 90  | TRG34        | Central   | Nakhon Pathom               | 2016 | BIOTEC |
| 91  | TRG36        | Central   | Nakhon Pathom               | 2016 | BIOTEC |
| 92  | TRG38        | North     | Phayao                      | 2016 | BIOTEC |
| 93  | TRG41        | North     | Chiang Rai                  | 2017 | BIOTEC |
| 94  | TRG43        | West      | Phetchaburi                 | 2018 | BIOTEC |
| 95  | TRG44        | Central   | Phra Nakhon Si<br>Ayutthaya | 2018 | BIOTEC |
| 96  | TRG47        | Northeast | Nong Bua Lam Phu            | 2018 | BIOTEC |
| 97  | UDN60001.1   | Northeast | Udon Thani                  | 2017 | KMITL  |
| 98  | UDN60003.2   | Northeast | Udon Thani                  | 2017 | KMITL  |
| 99  | UTI61007     | Central   | Uthai Thani                 | 2018 | KMITL  |
| 100 | YST61004     | Northeast | Yasothon                    | 2018 | KMITL  |
| 101 | พิษณุโลก40.4 | Central   | Phitsanulok                 | 2016 | KMITL  |
| 102 | UTD17002     | North     | Uttaradit                   | 2017 | KMITL  |
