# Supplementary material for: Identification of Pathogenicity Loci in Magnaporthe oryzae Using GWAS with Neck Blast Phenotypic Data
Source: Genes (Basel). 2022 May 20;13(5):916. doi: 10.3390/genes13050916 (PMC9141631; doi:10.3390/genes13050916)
Supplement: Supplementary file 1 [file genes-13-00916-s001.zip › Supplementary Table S4_Gene annotaions.xlsx]

## Sheet: annotation_ensmble_50kb
													Name & Taxanomy					Sequence	Gene Ontology (GO)
SNP No.	SNP	SNPChrom	SNPPos	GeneChrom	GenePosStart	GenePosEnd	Gene ID	Gene Name	biotype	Gene Description	logic_name	Acc ID	Entry name	Status	Protein names	Gene names	Organism	Length	Gene ontology (biological process)	Gene ontology (cellular component)	Gene ontology (GO)	Gene ontology (molecular function)	Gene ontology IDs	PHI_MolConn_ID	Gene Function	GO annotation	Mutant Phenotype
1	IRBLzt-T_3_322529	3	322529	3	286981	287443	MGG_16599		pseudogene		broad_genes
				3	291606	292055	MGG_09144		protein_coding	Putative uncharacterized protein [Source:UniProtKB/TrEMBL%3BAcc:G5EHB8]	broad_genes	G5EHB8	G5EHB8_MAGO7	unreviewed	Uncharacterized protein	MGCH7_ch7g946 MGG_09144	Magnaporthe oryzae (strain 70-15 / ATCC MYA-4617 / FGSC 8958) (Rice blast fungus) (Pyricularia oryzae)	149		extracellular space [GO:0005615]	extracellular space [GO:0005615]; toxin activity [GO:0090729]	toxin activity [GO:0090729]	GO:0005615; GO:0090729
				3	292697	293508	MGG_16600		protein_coding	Putative uncharacterized protein [Source:UniProtKB/TrEMBL%3BAcc:G5EHF1]	broad_genes	G5EHF1	G5EHF1_MAGO7	unreviewed	Uncharacterized protein	MGCH7_ch7g947 MGG_16600	Magnaporthe oryzae (strain 70-15 / ATCC MYA-4617 / FGSC 8958) (Rice blast fungus) (Pyricularia oryzae)	207
				3	294127	295792	MGG_09146		protein_coding	RTA1 domain-containing protein [Source:UniProtKB/TrEMBL%3BAcc:G5EHQ1]	broad_genes	G5EHQ1	G5EHQ1_MAGO7	unreviewed	RTA1 domain-containing protein	MGCH7_ch7g948 MGG_09146	Magnaporthe oryzae (strain 70-15 / ATCC MYA-4617 / FGSC 8958) (Rice blast fungus) (Pyricularia oryzae)	295		integral component of membrane [GO:0016021]	integral component of membrane [GO:0016021]		GO:0016021
				3	295827	296873	MGG_09147		protein_coding	Putative uncharacterized protein [Source:UniProtKB/TrEMBL%3BAcc:G5EH46]	broad_genes	G5EH46	G5EH46_MAGO7	unreviewed	Uncharacterized protein	MGCH7_ch7g949 MGG_09147	Magnaporthe oryzae (strain 70-15 / ATCC MYA-4617 / FGSC 8958) (Rice blast fungus) (Pyricularia oryzae)	348
				3	297557	298849	MGG_09148		protein_coding	Putative uncharacterized protein [Source:UniProtKB/TrEMBL%3BAcc:G4N092]	broad_genes	G4N092	G4N092_MAGO7	unreviewed	Uncharacterized protein	MGG_09148	Magnaporthe oryzae (strain 70-15 / ATCC MYA-4617 / FGSC 8958) (Rice blast fungus) (Pyricularia oryzae)	340	carbohydrate metabolic process [GO:0005975]		hydrolase activity, hydrolyzing O-glycosyl compounds [GO:0004553]; carbohydrate metabolic process [GO:0005975]	hydrolase activity, hydrolyzing O-glycosyl compounds [GO:0004553]	GO:0004553; GO:0005975
				3	298141	300854	MGG_13350		protein_coding	Putative uncharacterized protein [Source:UniProtKB/TrEMBL%3BAcc:G4N093]	broad_genes	G4N093	G4N093_MAGO7	unreviewed	Zn(2)-C6 fungal-type domain-containing protein	MGG_13350	Magnaporthe oryzae (strain 70-15 / ATCC MYA-4617 / FGSC 8958) (Rice blast fungus) (Pyricularia oryzae)	471		nucleus [GO:0005634]	nucleus [GO:0005634]; DNA-binding transcription factor activity, RNA polymerase II-specific [GO:0000981]; zinc ion binding [GO:0008270]	DNA-binding transcription factor activity, RNA polymerase II-specific [GO:0000981]; zinc ion binding [GO:0008270]	GO:0000981; GO:0005634; GO:0008270	PHI:5654	Zn2Cys6 transcription factor	0	unaffected pathogenicity
				3	304000	307126	MGG_09149		protein_coding	Putative uncharacterized protein [Source:UniProtKB/TrEMBL%3BAcc:G4N094]	broad_genes	G4N094	G4N094_MAGO7	unreviewed	Uncharacterized protein	MGG_09149	Magnaporthe oryzae (strain 70-15 / ATCC MYA-4617 / FGSC 8958) (Rice blast fungus) (Pyricularia oryzae)	974
				3	307734	309753	MGG_09150		protein_coding	Putative uncharacterized protein [Source:UniProtKB/TrEMBL%3BAcc:G4N096]	broad_genes	G4N096	G4N096_MAGO7	unreviewed	FAD-binding PCMH-type domain-containing protein	MGG_09150	Magnaporthe oryzae (strain 70-15 / ATCC MYA-4617 / FGSC 8958) (Rice blast fungus) (Pyricularia oryzae)	524			FAD binding [GO:0071949]; oxidoreductase activity [GO:0016491]	FAD binding [GO:0071949]; oxidoreductase activity [GO:0016491]	GO:0016491; GO:0071949
				3	315665	317558	MGG_16601		protein_coding	Putative uncharacterized protein [Source:UniProtKB/TrEMBL%3BAcc:G4N097]	broad_genes	G4N097	G4N097_MAGO7	unreviewed	Uncharacterized protein	MGG_16601	Magnaporthe oryzae (strain 70-15 / ATCC MYA-4617 / FGSC 8958) (Rice blast fungus) (Pyricularia oryzae)	472
				3	316090	316161	EFMOG00000000180	tRNA-Pseudo	tRNA_pseudogene	tRNA-Pseudo for anticodon GUU [Source:TRNASCAN_SE%3BAcc:tRNA-Pseudo]	ncrna_eg	tRNA-Pseudo
				3	318985	320224	MGG_09154		protein_coding	Putative uncharacterized protein [Source:UniProtKB/TrEMBL%3BAcc:G5EI68]	broad_genes	G5EI68	G5EI68_MAGO7	unreviewed	Uncharacterized protein	MGCH7_ch7g955 MGG_09154	Magnaporthe oryzae (strain 70-15 / ATCC MYA-4617 / FGSC 8958) (Rice blast fungus) (Pyricularia oryzae)	277
				3	334176	334638	MGG_16602		pseudogene		broad_genes
				3	348400	348994	MGG_15190		protein_coding	Putative uncharacterized protein [Source:UniProtKB/TrEMBL%3BAcc:G4N0A0]	broad_genes	G4N0A0	G4N0A0_MAGO7	unreviewed	Uncharacterized protein	MGG_15190	Magnaporthe oryzae (strain 70-15 / ATCC MYA-4617 / FGSC 8958) (Rice blast fungus) (Pyricularia oryzae)	163
				3	352700	353862	MGG_16603		protein_coding	Putative uncharacterized protein [Source:UniProtKB/TrEMBL%3BAcc:G4N0A1]	broad_genes	G4N0A1	G4N0A1_MAGO7	unreviewed	Uncharacterized protein	MGG_16603	Magnaporthe oryzae (strain 70-15 / ATCC MYA-4617 / FGSC 8958) (Rice blast fungus) (Pyricularia oryzae)	135
				3	354698	355233	MGG_07372		protein_coding	Putative uncharacterized protein [Source:UniProtKB/TrEMBL%3BAcc:G4N0A2]	broad_genes	G4N0A2	G4N0A2_MAGO7	unreviewed	Uncharacterized protein	MGG_07372	Magnaporthe oryzae (strain 70-15 / ATCC MYA-4617 / FGSC 8958) (Rice blast fungus) (Pyricularia oryzae)	142
				3	356825	357490	MGG_07373		protein_coding	Putative uncharacterized protein [Source:UniProtKB/TrEMBL%3BAcc:G4N0A3]	broad_genes	G4N0A3	G4N0A3_MAGO7	unreviewed	Uncharacterized protein	MGG_07373	Magnaporthe oryzae (strain 70-15 / ATCC MYA-4617 / FGSC 8958) (Rice blast fungus) (Pyricularia oryzae)	221
				3	358336	358612	MGG_16604		protein_coding	Putative uncharacterized protein [Source:UniProtKB/TrEMBL%3BAcc:G4N0A4]	broad_genes	G4N0A4	G4N0A4_MAGO7	unreviewed	Uncharacterized protein	MGG_16604	Magnaporthe oryzae (strain 70-15 / ATCC MYA-4617 / FGSC 8958) (Rice blast fungus) (Pyricularia oryzae)	59
				3	363238	365840	MGG_13360		protein_coding	Putative uncharacterized protein [Source:UniProtKB/TrEMBL%3BAcc:G4N0A5]	broad_genes	G4N0A5	G4N0A5_MAGO7	unreviewed	Zn(2)-C6 fungal-type domain-containing protein	MGG_13360	Magnaporthe oryzae (strain 70-15 / ATCC MYA-4617 / FGSC 8958) (Rice blast fungus) (Pyricularia oryzae)	597		nucleus [GO:0005634]	nucleus [GO:0005634]; DNA-binding transcription factor activity, RNA polymerase II-specific [GO:0000981]; zinc ion binding [GO:0008270]	DNA-binding transcription factor activity, RNA polymerase II-specific [GO:0000981]; zinc ion binding [GO:0008270]	GO:0000981; GO:0005634; GO:0008270	PHI:5655	Zn2Cys6 transcription factor	0	unaffected pathogenicity
				3	366429	371282	MGG_07375		protein_coding	ABC transporter CDR4 [Source:UniProtKB/TrEMBL%3BAcc:G4N0A6]	broad_genes	G4N0A6	G4N0A6_MAGO7	unreviewed	ABC transporter CDR4	MGG_07375	Magnaporthe oryzae (strain 70-15 / ATCC MYA-4617 / FGSC 8958) (Rice blast fungus) (Pyricularia oryzae)	1469		integral component of membrane [GO:0016021]	integral component of membrane [GO:0016021]; ATP binding [GO:0005524]; ATPase-coupled transmembrane transporter activity [GO:0042626]	ATPase-coupled transmembrane transporter activity [GO:0042626]; ATP binding [GO:0005524]	GO:0005524; GO:0016021; GO:0042626
				3	371622	372205	MGG_07376		protein_coding	Putative uncharacterized protein [Source:UniProtKB/TrEMBL%3BAcc:G4N0A7]	broad_genes	G4N0A7	G4N0A7_MAGO7	unreviewed	Uncharacterized protein	MGG_07376	Magnaporthe oryzae (strain 70-15 / ATCC MYA-4617 / FGSC 8958) (Rice blast fungus) (Pyricularia oryzae)	137		integral component of membrane [GO:0016021]	integral component of membrane [GO:0016021]		GO:0016021
2	IRBlsh-S_1_7553101	1	7553101	1	7503845	7505783	MGG_04404		protein_coding	Pisatin demethylase [Source:UniProtKB/TrEMBL%3BAcc:G4MKN0]	broad_genes	G4MKN0	G4MKN0_MAGO7	unreviewed	Pisatin demethylase	MGG_04404	Magnaporthe oryzae (strain 70-15 / ATCC MYA-4617 / FGSC 8958) (Rice blast fungus) (Pyricularia oryzae)	518	methylation [GO:0032259]	integral component of membrane [GO:0016021]	integral component of membrane [GO:0016021]; heme binding [GO:0020037]; iron ion binding [GO:0005506]; methyltransferase activity [GO:0008168]; monooxygenase activity [GO:0004497]; oxidoreductase activity, acting on paired donors, with incorporation or reduction of molecular oxygen [GO:0016705]; methylation [GO:0032259]	heme binding [GO:0020037]; iron ion binding [GO:0005506]; methyltransferase activity [GO:0008168]; monooxygenase activity [GO:0004497]; oxidoreductase activity, acting on paired donors, with incorporation or reduction of molecular oxygen [GO:0016705]	GO:0004497; GO:0005506; GO:0008168; GO:0016021; GO:0016705; GO:0020037; GO:0032259
				1	7509070	7509372	MGG_04403		protein_coding	Putative uncharacterized protein [Source:UniProtKB/TrEMBL%3BAcc:G4MKN1]	broad_genes	G4MKN1	G4MKN1_MAGO7	unreviewed	Uncharacterized protein	MGG_04403	Magnaporthe oryzae (strain 70-15 / ATCC MYA-4617 / FGSC 8958) (Rice blast fungus) (Pyricularia oryzae)	71
				1	7510136	7510552	MGG_16533		protein_coding	Putative uncharacterized protein [Source:UniProtKB/TrEMBL%3BAcc:G4MKN2]	broad_genes	G4MKN2	G4MKN2_MAGO7	unreviewed	Uncharacterized protein	MGG_16533	Magnaporthe oryzae (strain 70-15 / ATCC MYA-4617 / FGSC 8958) (Rice blast fungus) (Pyricularia oryzae)	63
				1	7511533	7513295	MGG_16534		protein_coding	Putative uncharacterized protein [Source:UniProtKB/TrEMBL%3BAcc:G4MKN3]	broad_genes	G4MKN3	G4MKN3_MAGO7	unreviewed	Uncharacterized protein	MGG_16534	Magnaporthe oryzae (strain 70-15 / ATCC MYA-4617 / FGSC 8958) (Rice blast fungus) (Pyricularia oryzae)	413
				1	7521619	7522504	MGG_16535		protein_coding	Putative uncharacterized protein [Source:UniProtKB/TrEMBL%3BAcc:G4MKN4]	broad_genes	G4MKN4	G4MKN4_MAGO7	unreviewed	Chromo domain-containing protein	MGG_16535	Magnaporthe oryzae (strain 70-15 / ATCC MYA-4617 / FGSC 8958) (Rice blast fungus) (Pyricularia oryzae)	224
				1	7527923	7528193	MGG_16536		protein_coding	Putative uncharacterized protein [Source:UniProtKB/TrEMBL%3BAcc:G4MKZ1]	broad_genes	G4MKZ1	G4MKZ1_MAGO7	unreviewed	Uncharacterized protein	MGG_16536	Magnaporthe oryzae (strain 70-15 / ATCC MYA-4617 / FGSC 8958) (Rice blast fungus) (Pyricularia oryzae)	69
				1	7545797	7546324	MGG_16537		protein_coding	Putative uncharacterized protein [Source:UniProtKB/TrEMBL%3BAcc:G4MKZ2]	broad_genes	G4MKZ2	G4MKZ2_MAGO7	unreviewed	Uncharacterized protein	MGG_16537	Magnaporthe oryzae (strain 70-15 / ATCC MYA-4617 / FGSC 8958) (Rice blast fungus) (Pyricularia oryzae)	115
				1	7547859	7549533	MGG_16538		protein_coding	Putative uncharacterized protein [Source:UniProtKB/TrEMBL%3BAcc:G4MKZ3]	broad_genes	G4MKZ3	G4MKZ3_MAGO7	unreviewed	Amine oxidase (EC 1.4.3.-)	MGG_16538	Magnaporthe oryzae (strain 70-15 / ATCC MYA-4617 / FGSC 8958) (Rice blast fungus) (Pyricularia oryzae)	494			oxidoreductase activity [GO:0016491]	oxidoreductase activity [GO:0016491]	GO:0016491
				1	7550152	7550958	MGG_16539		protein_coding	Putative uncharacterized protein [Source:UniProtKB/TrEMBL%3BAcc:G4MKZ4]	broad_genes	G4MKZ4	G4MKZ4_MAGO7	unreviewed	3'-5' exonuclease domain-containing protein	MGG_16539	Magnaporthe oryzae (strain 70-15 / ATCC MYA-4617 / FGSC 8958) (Rice blast fungus) (Pyricularia oryzae)	268			3'-5' exonuclease activity [GO:0008408]; nucleic acid binding [GO:0003676]	3'-5' exonuclease activity [GO:0008408]; nucleic acid binding [GO:0003676]	GO:0003676; GO:0008408
				1	7559256	7559660	MGG_08607		protein_coding	Putative uncharacterized protein [Source:UniProtKB/TrEMBL%3BAcc:G4MKZ5]	broad_genes	G4MKZ5	G4MKZ5_MAGO7	unreviewed	Uncharacterized protein	MGG_08607	Magnaporthe oryzae (strain 70-15 / ATCC MYA-4617 / FGSC 8958) (Rice blast fungus) (Pyricularia oryzae)	134
				1	7562671	7562949	MGG_16540		protein_coding	Putative uncharacterized protein [Source:UniProtKB/TrEMBL%3BAcc:G4MKZ6]	broad_genes	G4MKZ6	G4MKZ6_MAGO7	unreviewed	Uncharacterized protein	MGG_16540	Magnaporthe oryzae (strain 70-15 / ATCC MYA-4617 / FGSC 8958) (Rice blast fungus) (Pyricularia oryzae)	72
				1	7566379	7566945	MGG_08609		protein_coding	Putative uncharacterized protein [Source:UniProtKB/TrEMBL%3BAcc:G4MKZ7]	broad_genes	G4MKZ7	G4MKZ7_MAGO7	unreviewed	Uncharacterized protein	MGG_08609	Magnaporthe oryzae (strain 70-15 / ATCC MYA-4617 / FGSC 8958) (Rice blast fungus) (Pyricularia oryzae)	188		extracellular space [GO:0005615]	extracellular space [GO:0005615]; toxin activity [GO:0090729]	toxin activity [GO:0090729]	GO:0005615; GO:0090729
				1	7567213	7567875	MGG_08610		protein_coding	Putative uncharacterized protein [Source:UniProtKB/TrEMBL%3BAcc:G4MKZ8]	broad_genes	G4MKZ8	G4MKZ8_MAGO7	unreviewed	Uncharacterized protein	MGG_08610	Magnaporthe oryzae (strain 70-15 / ATCC MYA-4617 / FGSC 8958) (Rice blast fungus) (Pyricularia oryzae)	220
				1	7569175	7570836	MGG_08611		protein_coding	Putative uncharacterized protein [Source:UniProtKB/TrEMBL%3BAcc:G4MKZ9]	broad_genes	G4MKZ9	G4MKZ9_MAGO7	unreviewed	DAO domain-containing protein	MGG_08611	Magnaporthe oryzae (strain 70-15 / ATCC MYA-4617 / FGSC 8958) (Rice blast fungus) (Pyricularia oryzae)	526			oxidoreductase activity [GO:0016491]	oxidoreductase activity [GO:0016491]	GO:0016491
				1	7571568	7573511	MGG_08612		protein_coding	Putative uncharacterized protein [Source:UniProtKB/TrEMBL%3BAcc:G4ML00]	broad_genes	G4ML00	G4ML00_MAGO7	unreviewed	Uncharacterized protein	MGG_08612	Magnaporthe oryzae (strain 70-15 / ATCC MYA-4617 / FGSC 8958) (Rice blast fungus) (Pyricularia oryzae)	616
				1	7573621	7576308	MGG_08613		protein_coding	Polymerase 2 ADP-ribosyltransferase 2 [Source:UniProtKB/TrEMBL%3BAcc:G4ML01]	broad_genes	G4ML01	G4ML01_MAGO7	unreviewed	Poly [ADP-ribose] polymerase (PARP) (EC 2.4.2.-)	MGG_08613	Magnaporthe oryzae (strain 70-15 / ATCC MYA-4617 / FGSC 8958) (Rice blast fungus) (Pyricularia oryzae)	733	protein ADP-ribosylation [GO:0006471]	nucleus [GO:0005634]	nucleus [GO:0005634]; NAD+ ADP-ribosyltransferase activity [GO:0003950]; protein ADP-ribosylation [GO:0006471]	NAD+ ADP-ribosyltransferase activity [GO:0003950]	GO:0003950; GO:0005634; GO:0006471
				1	7576416	7578290	MGG_08614		protein_coding	Putative uncharacterized protein [Source:UniProtKB/TrEMBL%3BAcc:G4ML02]	broad_genes	G4ML02	G4ML02_MAGO7	unreviewed	SET domain-containing protein	MGG_08614	Magnaporthe oryzae (strain 70-15 / ATCC MYA-4617 / FGSC 8958) (Rice blast fungus) (Pyricularia oryzae)	399
				1	7578503	7580664	MGG_14264		protein_coding	Cytochrome b2 [Source:UniProtKB/TrEMBL%3BAcc:G4ML03]	broad_genes	G4ML03	G4ML03_MAGO7	unreviewed	Cytochrome b2	MGG_14264	Magnaporthe oryzae (strain 70-15 / ATCC MYA-4617 / FGSC 8958) (Rice blast fungus) (Pyricularia oryzae)	509			heme binding [GO:0020037]; metal ion binding [GO:0046872]; oxidoreductase activity [GO:0016491]	heme binding [GO:0020037]; metal ion binding [GO:0046872]; oxidoreductase activity [GO:0016491]	GO:0016491; GO:0020037; GO:0046872
				1	7580979	7582343	MGG_08615		protein_coding	Dihydrodipicolinate synthase [Source:UniProtKB/TrEMBL%3BAcc:G4ML04]	broad_genes	G4ML04	G4ML04_MAGO7	unreviewed	Dihydrodipicolinate synthase	MGG_08615	Magnaporthe oryzae (strain 70-15 / ATCC MYA-4617 / FGSC 8958) (Rice blast fungus) (Pyricularia oryzae)	329			lyase activity [GO:0016829]	lyase activity [GO:0016829]	GO:0016829
				1	7582270	7586735	MGG_08616		protein_coding	Glycosyl hydrolase [Source:UniProtKB/TrEMBL%3BAcc:G4ML05]	broad_genes	G4ML05	G4ML05_MAGO7	unreviewed	Glycosyl hydrolase	MGG_08616	Magnaporthe oryzae (strain 70-15 / ATCC MYA-4617 / FGSC 8958) (Rice blast fungus) (Pyricularia oryzae)	396			hydrolase activity [GO:0016787]	hydrolase activity [GO:0016787]	GO:0016787
				1	7584468	7586502	MGG_08617		protein_coding	H(+)/hexose cotransporter 1 [Source:UniProtKB/TrEMBL%3BAcc:G4ML06]	broad_genes	G4ML06	G4ML06_MAGO7	unreviewed	H(+)/hexose cotransporter 1	MGG_08617	Magnaporthe oryzae (strain 70-15 / ATCC MYA-4617 / FGSC 8958) (Rice blast fungus) (Pyricularia oryzae)	551		integral component of membrane [GO:0016021]	integral component of membrane [GO:0016021]; transmembrane transporter activity [GO:0022857]	transmembrane transporter activity [GO:0022857]	GO:0016021; GO:0022857
				1	7586812	7591120	MGG_08618		protein_coding	Putative uncharacterized protein [Source:UniProtKB/TrEMBL%3BAcc:G4ML07]	broad_genes	G4ML07	G4ML07_MAGO7	unreviewed	Zn(2)-C6 fungal-type domain-containing protein	MGG_08618	Magnaporthe oryzae (strain 70-15 / ATCC MYA-4617 / FGSC 8958) (Rice blast fungus) (Pyricularia oryzae)	809	transcription, DNA-templated [GO:0006351]	nucleus [GO:0005634]	nucleus [GO:0005634]; DNA binding [GO:0003677]; DNA-binding transcription factor activity, RNA polymerase II-specific [GO:0000981]; zinc ion binding [GO:0008270]; transcription, DNA-templated [GO:0006351]	DNA binding [GO:0003677]; DNA-binding transcription factor activity, RNA polymerase II-specific [GO:0000981]; zinc ion binding [GO:0008270]	GO:0000981; GO:0003677; GO:0005634; GO:0006351; GO:0008270
				1	7591661	7592836	MGG_08619		protein_coding	Aryl-alcohol dehydrogenase [Source:UniProtKB/TrEMBL%3BAcc:G4ML08]	broad_genes	G4ML08	G4ML08_MAGO7	unreviewed	Aryl-alcohol dehydrogenase	MGG_08619	Magnaporthe oryzae (strain 70-15 / ATCC MYA-4617 / FGSC 8958) (Rice blast fungus) (Pyricularia oryzae)	358			D-threo-aldose 1-dehydrogenase activity [GO:0047834]	D-threo-aldose 1-dehydrogenase activity [GO:0047834]	GO:0047834
				1	7594428	7596364	MGG_08620		protein_coding	Peptide transporter PTR2-A [Source:UniProtKB/TrEMBL%3BAcc:G4ML09]	broad_genes	G4ML09	G4ML09_MAGO7	unreviewed	Peptide transporter PTR2-A	MGG_08620	Magnaporthe oryzae (strain 70-15 / ATCC MYA-4617 / FGSC 8958) (Rice blast fungus) (Pyricularia oryzae)	600	oligopeptide transport [GO:0006857]	integral component of membrane [GO:0016021]	integral component of membrane [GO:0016021]; transmembrane transporter activity [GO:0022857]; oligopeptide transport [GO:0006857]	transmembrane transporter activity [GO:0022857]	GO:0006857; GO:0016021; GO:0022857
				1	7596645	7597537	MGG_08621		protein_coding	Putative uncharacterized protein [Source:UniProtKB/TrEMBL%3BAcc:G4ML10]	broad_genes	G4ML10	G4ML10_MAGO7	unreviewed	Uncharacterized protein	MGG_08621	Magnaporthe oryzae (strain 70-15 / ATCC MYA-4617 / FGSC 8958) (Rice blast fungus) (Pyricularia oryzae)	217
				1	7597429	7600149	MGG_08622		protein_coding	Nucleoside diphosphate kinase [Source:UniProtKB/TrEMBL%3BAcc:G4ML11]	broad_genes	G4ML11	G4ML11_MAGO7	unreviewed	Nucleoside diphosphate kinase (EC 2.7.4.6)	MGG_08622	Magnaporthe oryzae (strain 70-15 / ATCC MYA-4617 / FGSC 8958) (Rice blast fungus) (Pyricularia oryzae)	237	CTP biosynthetic process [GO:0006241]; GTP biosynthetic process [GO:0006183]; UTP biosynthetic process [GO:0006228]	integral component of membrane [GO:0016021]	integral component of membrane [GO:0016021]; ATP binding [GO:0005524]; nucleoside diphosphate kinase activity [GO:0004550]; CTP biosynthetic process [GO:0006241]; GTP biosynthetic process [GO:0006183]; UTP biosynthetic process [GO:0006228]	ATP binding [GO:0005524]; nucleoside diphosphate kinase activity [GO:0004550]	GO:0004550; GO:0005524; GO:0006183; GO:0006228; GO:0006241; GO:0016021
				1	7599457	7602779	MGG_08623		protein_coding	Neutral alpha-glucosidase AB [Source:UniProtKB/TrEMBL%3BAcc:G4ML12]	broad_genes	G4ML12	G4ML12_MAGO7	unreviewed	Probable alpha/beta-glucosidase agdC	MGG_08623	Magnaporthe oryzae (strain 70-15 / ATCC MYA-4617 / FGSC 8958) (Rice blast fungus) (Pyricularia oryzae)	980	carbohydrate metabolic process [GO:0005975]		carbohydrate binding [GO:0030246]; hydrolase activity, hydrolyzing O-glycosyl compounds [GO:0004553]; carbohydrate metabolic process [GO:0005975]	carbohydrate binding [GO:0030246]; hydrolase activity, hydrolyzing O-glycosyl compounds [GO:0004553]	GO:0004553; GO:0005975; GO:0030246
				1	7602688	7603752	MGG_08624	ERG2	protein_coding	C-8 sterol isomerase [Source:UniProtKB/Swiss-Prot%3BAcc:P33281]	broad_genes	P33281	ERG2_MAGO7	reviewed	C-8 sterol isomerase (EC 5.-.-.-) (Delta-8--delta-7 sterol isomerase)	ERG2 MGG_08624	Magnaporthe oryzae (strain 70-15 / ATCC MYA-4617 / FGSC 8958) (Rice blast fungus) (Pyricularia oryzae)	221	sterol biosynthetic process [GO:0016126]	endoplasmic reticulum membrane [GO:0005789]; integral component of membrane [GO:0016021]	endoplasmic reticulum membrane [GO:0005789]; integral component of membrane [GO:0016021]; isomerase activity [GO:0016853]; sterol biosynthetic process [GO:0016126]	isomerase activity [GO:0016853]	GO:0005789; GO:0016021; GO:0016126; GO:0016853
3	IRBlsh-S_1_5731374	1	5731374	1	5680752	5682210	MGG_05568		protein_coding	Putative uncharacterized protein [Source:UniProtKB/TrEMBL%3BAcc:G4MMQ9]	broad_genes	G4MMQ9	G4MMQ9_MAGO7	unreviewed	Presequence translocated-associated motor subunit PAM17	MGG_05568	Magnaporthe oryzae (strain 70-15 / ATCC MYA-4617 / FGSC 8958) (Rice blast fungus) (Pyricularia oryzae)	238	protein import into mitochondrial matrix [GO:0030150]	integral component of membrane [GO:0016021]; PAM complex, Tim23 associated import motor [GO:0001405]	integral component of membrane [GO:0016021]; PAM complex, Tim23 associated import motor [GO:0001405]; protein import into mitochondrial matrix [GO:0030150]		GO:0001405; GO:0016021; GO:0030150
				1	5681896	5683799	MGG_05569	UBA4	protein_coding	Adenylyltransferase and sulfurtransferase UBA4 Adenylyltransferase UBA4 Sulfurtransferase UBA4 [Source:UniProtKB/Swiss-Prot%3BAcc:A4RPM5]	broad_genes
				1	5684010	5685054	MGG_05570		protein_coding	Putative uncharacterized protein [Source:UniProtKB/TrEMBL%3BAcc:G4MMR1]	broad_genes	G4MMR1	G4MMR1_MAGO7	unreviewed	Ribosome biogenesis protein SLX9	MGG_05570	Magnaporthe oryzae (strain 70-15 / ATCC MYA-4617 / FGSC 8958) (Rice blast fungus) (Pyricularia oryzae)	208	maturation of SSU-rRNA from tricistronic rRNA transcript (SSU-rRNA, 5.8S rRNA, LSU-rRNA) [GO:0000462]	90S preribosome [GO:0030686]; nucleolus [GO:0005730]; preribosome, small subunit precursor [GO:0030688]	90S preribosome [GO:0030686]; nucleolus [GO:0005730]; preribosome, small subunit precursor [GO:0030688]; maturation of SSU-rRNA from tricistronic rRNA transcript (SSU-rRNA, 5.8S rRNA, LSU-rRNA) [GO:0000462]		GO:0000462; GO:0005730; GO:0030686; GO:0030688
				1	5685511	5687706	MGG_05571		protein_coding	Putative uncharacterized protein [Source:UniProtKB/TrEMBL%3BAcc:G4MMR2]	broad_genes	G4MMR2	G4MMR2_MAGO7	unreviewed	ULP_PROTEASE domain-containing protein	MGG_05571	Magnaporthe oryzae (strain 70-15 / ATCC MYA-4617 / FGSC 8958) (Rice blast fungus) (Pyricularia oryzae)	259			NEDD8-specific protease activity [GO:0019784]	NEDD8-specific protease activity [GO:0019784]	GO:0019784
				1	5688050	5691019	MGG_05572		protein_coding	Putative uncharacterized protein [Source:UniProtKB/TrEMBL%3BAcc:G4MN22]	broad_genes	G4MN22	G4MN22_MAGO7	unreviewed	Uncharacterized protein	MGG_05572	Magnaporthe oryzae (strain 70-15 / ATCC MYA-4617 / FGSC 8958) (Rice blast fungus) (Pyricularia oryzae)	557
				1	5690584	5691867	MGG_16409		protein_coding	Putative uncharacterized protein [Source:UniProtKB/TrEMBL%3BAcc:G4MN23]	broad_genes	G4MN23	G4MN23_MAGO7	unreviewed	Uncharacterized protein	MGG_16409	Magnaporthe oryzae (strain 70-15 / ATCC MYA-4617 / FGSC 8958) (Rice blast fungus) (Pyricularia oryzae)	224		integral component of membrane [GO:0016021]	integral component of membrane [GO:0016021]		GO:0016021
				1	5691858	5694792	MGG_16410		protein_coding	Putative uncharacterized protein [Source:UniProtKB/TrEMBL%3BAcc:G4MN24]	broad_genes	G4MN24	G4MN24_MAGO7	unreviewed	Uncharacterized protein	MGG_16410	Magnaporthe oryzae (strain 70-15 / ATCC MYA-4617 / FGSC 8958) (Rice blast fungus) (Pyricularia oryzae)	523			flavin adenine dinucleotide binding [GO:0050660]; N,N-dimethylaniline monooxygenase activity [GO:0004499]; NADP binding [GO:0050661]	flavin adenine dinucleotide binding [GO:0050660]; N,N-dimethylaniline monooxygenase activity [GO:0004499]; NADP binding [GO:0050661]	GO:0004499; GO:0050660; GO:0050661
				1	5695668	5696561	MGG_05575		protein_coding	Putative uncharacterized protein [Source:UniProtKB/TrEMBL%3BAcc:G4MN25]	broad_genes	G4MN25	G4MN25_MAGO7	unreviewed	Uncharacterized protein	MGG_05575	Magnaporthe oryzae (strain 70-15 / ATCC MYA-4617 / FGSC 8958) (Rice blast fungus) (Pyricularia oryzae)	297
				1	5698239	5699593	MGG_16411		protein_coding	Putative uncharacterized protein [Source:UniProtKB/TrEMBL%3BAcc:G4MN26]	broad_genes	G4MN26	G4MN26_MAGO7	unreviewed	Uncharacterized protein	MGG_16411	Magnaporthe oryzae (strain 70-15 / ATCC MYA-4617 / FGSC 8958) (Rice blast fungus) (Pyricularia oryzae)	211
				1	5700295	5702435	MGG_05577		protein_coding	Putative uncharacterized protein [Source:UniProtKB/TrEMBL%3BAcc:G4MN27]	broad_genes	G4MN27	G4MN27_MAGO7	unreviewed	Beta-lactamase domain-containing protein	MGG_05577	Magnaporthe oryzae (strain 70-15 / ATCC MYA-4617 / FGSC 8958) (Rice blast fungus) (Pyricularia oryzae)	584
				1	5702477	5704496	MGG_05578		protein_coding	C6 zinc finger domain-containing protein [Source:UniProtKB/TrEMBL%3BAcc:G4MN28]	broad_genes	G4MN28	G4MN28_MAGO7	unreviewed	C6 zinc finger domain-containing protein	MGG_05578	Magnaporthe oryzae (strain 70-15 / ATCC MYA-4617 / FGSC 8958) (Rice blast fungus) (Pyricularia oryzae)	492		nucleus [GO:0005634]	nucleus [GO:0005634]; DNA-binding transcription factor activity, RNA polymerase II-specific [GO:0000981]; zinc ion binding [GO:0008270]	DNA-binding transcription factor activity, RNA polymerase II-specific [GO:0000981]; zinc ion binding [GO:0008270]	GO:0000981; GO:0005634; GO:0008270
				1	5704982	5706495	MGG_05579		protein_coding	Putative uncharacterized protein [Source:UniProtKB/TrEMBL%3BAcc:G4MN29]	broad_genes	G4MN29	G4MN29_MAGO7	unreviewed	AB hydrolase-1 domain-containing protein	MGG_05579	Magnaporthe oryzae (strain 70-15 / ATCC MYA-4617 / FGSC 8958) (Rice blast fungus) (Pyricularia oryzae)	323
				1	5706925	5709122	MGG_05580		protein_coding	CAIB/BAIF family enzyme [Source:UniProtKB/TrEMBL%3BAcc:G4MN30]	broad_genes	G4MN30	G4MN30_MAGO7	unreviewed	CAIB/BAIF family enzyme	MGG_05580	Magnaporthe oryzae (strain 70-15 / ATCC MYA-4617 / FGSC 8958) (Rice blast fungus) (Pyricularia oryzae)	657			CoA-transferase activity [GO:0008410]	CoA-transferase activity [GO:0008410]	GO:0008410
				1	5710926	5711618	MGG_05581		protein_coding	Putative uncharacterized protein [Source:UniProtKB/TrEMBL%3BAcc:G4MN31]	broad_genes	G4MN31	G4MN31_MAGO7	unreviewed	Uncharacterized protein	MGG_05581	Magnaporthe oryzae (strain 70-15 / ATCC MYA-4617 / FGSC 8958) (Rice blast fungus) (Pyricularia oryzae)	230
				1	5714151	5714951	MGG_05582		protein_coding	Putative uncharacterized protein [Source:UniProtKB/TrEMBL%3BAcc:G4MN32]	broad_genes	G4MN32	G4MN32_MAGO7	unreviewed	Uncharacterized protein	MGG_05582	Magnaporthe oryzae (strain 70-15 / ATCC MYA-4617 / FGSC 8958) (Rice blast fungus) (Pyricularia oryzae)	266
				1	5716845	5717336	MGG_15154		protein_coding	Putative uncharacterized protein [Source:UniProtKB/TrEMBL%3BAcc:G4MN33]	broad_genes	G4MN33	G4MN33_MAGO7	unreviewed	Uncharacterized protein	MGG_15154	Magnaporthe oryzae (strain 70-15 / ATCC MYA-4617 / FGSC 8958) (Rice blast fungus) (Pyricularia oryzae)	70
				1	5717275	5719976	MGG_05584		protein_coding	Putative uncharacterized protein [Source:UniProtKB/TrEMBL%3BAcc:G4MN34]	broad_genes	G4MN34	G4MN34_MAGO7	unreviewed	AZUL domain-containing protein	MGG_05584	Magnaporthe oryzae (strain 70-15 / ATCC MYA-4617 / FGSC 8958) (Rice blast fungus) (Pyricularia oryzae)	764	ubiquitin-dependent protein catabolic process [GO:0006511]		ubiquitin-dependent protein catabolic process [GO:0006511]		GO:0006511
				1	5721496	5724233	MGG_13121		protein_coding	Putative uncharacterized protein [Source:UniProtKB/TrEMBL%3BAcc:G4MN35]	broad_genes	G4MN35	G4MN35_MAGO7	unreviewed	Uncharacterized protein	MGG_13121	Magnaporthe oryzae (strain 70-15 / ATCC MYA-4617 / FGSC 8958) (Rice blast fungus) (Pyricularia oryzae)	451
				1	5724729	5725073	MGG_16412		protein_coding	Putative uncharacterized protein [Source:UniProtKB/TrEMBL%3BAcc:G4MN36]	broad_genes	G4MN36	G4MN36_MAGO7	unreviewed	Uncharacterized protein	MGG_16412	Magnaporthe oryzae (strain 70-15 / ATCC MYA-4617 / FGSC 8958) (Rice blast fungus) (Pyricularia oryzae)	52
				1	5726863	5729704	MGG_05587		protein_coding	Actin-like protein arp-6 [Source:UniProtKB/TrEMBL%3BAcc:G4MN37]	broad_genes	G4MN37	G4MN37_MAGO7	unreviewed	Actin-like protein arp-6	MGG_05587	Magnaporthe oryzae (strain 70-15 / ATCC MYA-4617 / FGSC 8958) (Rice blast fungus) (Pyricularia oryzae)	478	histone exchange [GO:0043486]	Swr1 complex [GO:0000812]	Swr1 complex [GO:0000812]; histone exchange [GO:0043486]		GO:0000812; GO:0043486
				1	5730278	5730822	MGG_16413		pseudogene		broad_genes
				1	5730884	5731599	MGG_16414		protein_coding	Putative uncharacterized protein [Source:UniProtKB/TrEMBL%3BAcc:G4MN39]	broad_genes	G4MN39	G4MN39_MAGO7	unreviewed	Uncharacterized protein	MGG_16414	Magnaporthe oryzae (strain 70-15 / ATCC MYA-4617 / FGSC 8958) (Rice blast fungus) (Pyricularia oryzae)	49
				1	5748736	5755754	MGG_05589		protein_coding	Lovastatin nonaketide synthase [Source:UniProtKB/TrEMBL%3BAcc:G4MN40]	broad_genes	G4MN40	G4MN40_MAGO7	unreviewed	Lovastatin nonaketide synthase	MGG_05589	Magnaporthe oryzae (strain 70-15 / ATCC MYA-4617 / FGSC 8958) (Rice blast fungus) (Pyricularia oryzae)	2252	metabolic process [GO:0008152]		acyltransferase activity [GO:0016746]; oxidoreductase activity [GO:0016491]; phosphopantetheine binding [GO:0031177]; metabolic process [GO:0008152]	acyltransferase activity [GO:0016746]; oxidoreductase activity [GO:0016491]; phosphopantetheine binding [GO:0031177]	GO:0008152; GO:0016491; GO:0016746; GO:0031177
				1	5757154	5758501	MGG_05590		protein_coding	Zeaxanthin epoxidase [Source:UniProtKB/TrEMBL%3BAcc:G4MN41]	broad_genes	G4MN41	G4MN41_MAGO7	unreviewed	Zeaxanthin epoxidase	MGG_05590	Magnaporthe oryzae (strain 70-15 / ATCC MYA-4617 / FGSC 8958) (Rice blast fungus) (Pyricularia oryzae)	416		integral component of membrane [GO:0016021]	integral component of membrane [GO:0016021]; FAD binding [GO:0071949]	FAD binding [GO:0071949]	GO:0016021; GO:0071949
				1	5759786	5760533	MGG_05591		protein_coding	Putative uncharacterized protein [Source:UniProtKB/TrEMBL%3BAcc:G4MN42]	broad_genes	G4MN42	G4MN42_MAGO7	unreviewed	Uncharacterized protein	MGG_05591	Magnaporthe oryzae (strain 70-15 / ATCC MYA-4617 / FGSC 8958) (Rice blast fungus) (Pyricularia oryzae)	169
				1	5761734	5763376	MGG_05592		protein_coding	Putative uncharacterized protein [Source:UniProtKB/TrEMBL%3BAcc:G4MN43]	broad_genes	G4MN43	G4MN43_MAGO7	unreviewed	Carboxylic ester hydrolase (EC 3.1.1.-)	MGG_05592	Magnaporthe oryzae (strain 70-15 / ATCC MYA-4617 / FGSC 8958) (Rice blast fungus) (Pyricularia oryzae)	541			carboxylic ester hydrolase activity [GO:0052689]; metal ion binding [GO:0046872]	carboxylic ester hydrolase activity [GO:0052689]; metal ion binding [GO:0046872]	GO:0046872; GO:0052689
				1	5763555	5764268	MGG_13126		protein_coding	Putative uncharacterized protein [Source:UniProtKB/TrEMBL%3BAcc:G4MN44]	broad_genes	G4MN44	G4MN44_MAGO7	unreviewed	Uncharacterized protein	MGG_13126	Magnaporthe oryzae (strain 70-15 / ATCC MYA-4617 / FGSC 8958) (Rice blast fungus) (Pyricularia oryzae)	237
				1	5764790	5765741	MGG_13127		protein_coding	Putative uncharacterized protein [Source:UniProtKB/TrEMBL%3BAcc:G4MN45]	broad_genes	G4MN45	G4MN45_MAGO7	unreviewed	Uncharacterized protein	MGG_13127	Magnaporthe oryzae (strain 70-15 / ATCC MYA-4617 / FGSC 8958) (Rice blast fungus) (Pyricularia oryzae)	289
				1	5766500	5767507	MGG_05593		protein_coding	Putative uncharacterized protein [Source:UniProtKB/TrEMBL%3BAcc:G4MN46]	broad_genes	G4MN46	G4MN46_MAGO7	unreviewed	FSH1 domain-containing protein	MGG_05593	Magnaporthe oryzae (strain 70-15 / ATCC MYA-4617 / FGSC 8958) (Rice blast fungus) (Pyricularia oryzae)	255
				1	5768694	5769176	MGG_16415		protein_coding	Putative uncharacterized protein [Source:UniProtKB/TrEMBL%3BAcc:G4MN47]	broad_genes	G4MN47	G4MN47_MAGO7	unreviewed	Uncharacterized protein	MGG_16415	Magnaporthe oryzae (strain 70-15 / ATCC MYA-4617 / FGSC 8958) (Rice blast fungus) (Pyricularia oryzae)	98
				1	5775384	5776069	MGG_16416		protein_coding	Putative uncharacterized protein [Source:UniProtKB/TrEMBL%3BAcc:G4MN48]	broad_genes	G4MN48	G4MN48_MAGO7	unreviewed	Uncharacterized protein	MGG_16416	Magnaporthe oryzae (strain 70-15 / ATCC MYA-4617 / FGSC 8958) (Rice blast fungus) (Pyricularia oryzae)	152
				1	5776554	5778868	MGG_13129		protein_coding	Putative uncharacterized protein [Source:UniProtKB/TrEMBL%3BAcc:G4MN49]	broad_genes	G4MN49	G4MN49_MAGO7	unreviewed	F-box domain-containing protein	MGG_13129	Magnaporthe oryzae (strain 70-15 / ATCC MYA-4617 / FGSC 8958) (Rice blast fungus) (Pyricularia oryzae)	620
4	IRBlsh-S_1_7876964	1	7876964	1	7826644	7827429	MGG_16556		protein_coding	Putative uncharacterized protein [Source:UniProtKB/TrEMBL%3BAcc:G4MLJ2]	broad_genes	G4MLJ2	G4MLJ2_MAGO7	unreviewed	Uncharacterized protein	MGG_16556	Magnaporthe oryzae (strain 70-15 / ATCC MYA-4617 / FGSC 8958) (Rice blast fungus) (Pyricularia oryzae)	111
				1	7830135	7831208	MGG_15418		protein_coding	Putative uncharacterized protein [Source:UniProtKB/TrEMBL%3BAcc:G4MLJ3]	broad_genes	G4MLJ3	G4MLJ3_MAGO7	unreviewed	BTB domain-containing protein	MGG_15418	Magnaporthe oryzae (strain 70-15 / ATCC MYA-4617 / FGSC 8958) (Rice blast fungus) (Pyricularia oryzae)	285
				1	7835476	7835547	EFMOG00000000244	tRNA-Pseudo	tRNA_pseudogene	tRNA-Pseudo for anticodon GUU [Source:TRNASCAN_SE%3BAcc:tRNA-Pseudo]	ncrna_eg	tRNA-Pseudo
				1	7837939	7839438	MGG_16557		protein_coding	Putative uncharacterized protein [Source:UniProtKB/TrEMBL%3BAcc:G4MLJ4]	broad_genes	G4MLJ4	G4MLJ4_MAGO7	unreviewed	Uncharacterized protein	MGG_16557	Magnaporthe oryzae (strain 70-15 / ATCC MYA-4617 / FGSC 8958) (Rice blast fungus) (Pyricularia oryzae)	395
				1	7841640	7842821	MGG_16558		protein_coding	Putative uncharacterized protein [Source:UniProtKB/TrEMBL%3BAcc:G4MLJ5]	broad_genes	G4MLJ5	G4MLJ5_MAGO7	unreviewed	Uncharacterized protein	MGG_16558	Magnaporthe oryzae (strain 70-15 / ATCC MYA-4617 / FGSC 8958) (Rice blast fungus) (Pyricularia oryzae)	361
				1	7844289	7844360	EFMOG00000000204	tRNA-Pseudo	tRNA_pseudogene	tRNA-Pseudo for anticodon GUU [Source:TRNASCAN_SE%3BAcc:tRNA-Pseudo]	ncrna_eg	tRNA-Pseudo
				1	7847952	7848992	MGG_16559		protein_coding	Putative uncharacterized protein [Source:UniProtKB/TrEMBL%3BAcc:G4MLJ6]	broad_genes	G4MLJ6	G4MLJ6_MAGO7	unreviewed	GMC_OxRdtase_N domain-containing protein	MGG_16559	Magnaporthe oryzae (strain 70-15 / ATCC MYA-4617 / FGSC 8958) (Rice blast fungus) (Pyricularia oryzae)	258		integral component of membrane [GO:0016021]	integral component of membrane [GO:0016021]; flavin adenine dinucleotide binding [GO:0050660]; oxidoreductase activity, acting on CH-OH group of donors [GO:0016614]	flavin adenine dinucleotide binding [GO:0050660]; oxidoreductase activity, acting on CH-OH group of donors [GO:0016614]	GO:0016021; GO:0016614; GO:0050660
				1	7849344	7850395	MGG_16560		protein_coding	Putative uncharacterized protein [Source:UniProtKB/TrEMBL%3BAcc:G4MLJ7]	broad_genes	G4MLJ7	G4MLJ7_MAGO7	unreviewed	Uncharacterized protein	MGG_16560	Magnaporthe oryzae (strain 70-15 / ATCC MYA-4617 / FGSC 8958) (Rice blast fungus) (Pyricularia oryzae)	203
				1	7853534	7854463	MGG_16561		protein_coding	Putative uncharacterized protein [Source:UniProtKB/TrEMBL%3BAcc:G4MLJ8]	broad_genes	G4MLJ8	G4MLJ8_MAGO7	unreviewed	Uncharacterized protein	MGG_16561	Magnaporthe oryzae (strain 70-15 / ATCC MYA-4617 / FGSC 8958) (Rice blast fungus) (Pyricularia oryzae)	292		integral component of membrane [GO:0016021]	integral component of membrane [GO:0016021]		GO:0016021
				1	7855688	7856104	MGG_15419		protein_coding	Putative uncharacterized protein [Source:UniProtKB/TrEMBL%3BAcc:G4MLV3]	broad_genes	G4MLV3	G4MLV3_MAGO7	unreviewed	Uncharacterized protein	MGG_15419	Magnaporthe oryzae (strain 70-15 / ATCC MYA-4617 / FGSC 8958) (Rice blast fungus) (Pyricularia oryzae)	138
				1	7856678	7857512	MGG_11852		protein_coding	Putative uncharacterized protein [Source:UniProtKB/TrEMBL%3BAcc:G4MLV4]	broad_genes	G4MLV4	G4MLV4_MAGO7	unreviewed	Uncharacterized protein	MGG_11852	Magnaporthe oryzae (strain 70-15 / ATCC MYA-4617 / FGSC 8958) (Rice blast fungus) (Pyricularia oryzae)	218
				1	7867310	7867955	MGG_16562		protein_coding	Putative uncharacterized protein [Source:UniProtKB/TrEMBL%3BAcc:G4MLV5]	broad_genes	G4MLV5	G4MLV5_MAGO7	unreviewed	Uncharacterized protein	MGG_16562	Magnaporthe oryzae (strain 70-15 / ATCC MYA-4617 / FGSC 8958) (Rice blast fungus) (Pyricularia oryzae)	187
				1	7870527	7871132	MGG_15420		protein_coding	Putative uncharacterized protein [Source:UniProtKB/TrEMBL%3BAcc:G4MLV6]	broad_genes	G4MLV6	G4MLV6_MAGO7	unreviewed	Uncharacterized protein	MGG_15420	Magnaporthe oryzae (strain 70-15 / ATCC MYA-4617 / FGSC 8958) (Rice blast fungus) (Pyricularia oryzae)	170
				1	7871618	7871689	EFMOG00000000158	tRNA-Pseudo	tRNA_pseudogene	tRNA-Pseudo for anticodon GUU [Source:TRNASCAN_SE%3BAcc:tRNA-Pseudo]	ncrna_eg	tRNA-Pseudo
				1	7874040	7874111	EFMOG00000000042	tRNA-Pseudo	tRNA_pseudogene	tRNA-Pseudo for anticodon GUU [Source:TRNASCAN_SE%3BAcc:tRNA-Pseudo]	ncrna_eg	tRNA-Pseudo
				1	7877290	7878413	MGG_10921		protein_coding	Putative uncharacterized protein [Source:UniProtKB/TrEMBL%3BAcc:G4MLV7]	broad_genes	G4MLV7	G4MLV7_MAGO7	unreviewed	Uncharacterized protein	MGG_10921	Magnaporthe oryzae (strain 70-15 / ATCC MYA-4617 / FGSC 8958) (Rice blast fungus) (Pyricularia oryzae)	263
				1	7880754	7883625	MGG_14358		protein_coding	Putative uncharacterized protein [Source:UniProtKB/TrEMBL%3BAcc:G4MLV8]	broad_genes	G4MLV8	G4MLV8_MAGO7	unreviewed	Uncharacterized protein	MGG_14358	Magnaporthe oryzae (strain 70-15 / ATCC MYA-4617 / FGSC 8958) (Rice blast fungus) (Pyricularia oryzae)	304
				1	7882555	7885267	MGG_10924		protein_coding	Putative uncharacterized protein [Source:UniProtKB/TrEMBL%3BAcc:G4MLV9]	broad_genes	G4MLV9	G4MLV9_MAGO7	unreviewed	Uncharacterized protein	MGG_10924	Magnaporthe oryzae (strain 70-15 / ATCC MYA-4617 / FGSC 8958) (Rice blast fungus) (Pyricularia oryzae)	435
				1	7886881	7888802	MGG_10925		protein_coding	Putative uncharacterized protein [Source:UniProtKB/TrEMBL%3BAcc:G4MLW0]	broad_genes	G4MLW0	G4MLW0_MAGO7	unreviewed	HNHc domain-containing protein	MGG_10925	Magnaporthe oryzae (strain 70-15 / ATCC MYA-4617 / FGSC 8958) (Rice blast fungus) (Pyricularia oryzae)	547
				1	7890026	7890488	MGG_16563		pseudogene		broad_genes
				1	7891237	7891569	MGG_16564		pseudogene		broad_genes
				1	7901436	7901905	MGG_16565		pseudogene		broad_genes
				1	7908676	7909386	MGG_16566		pseudogene		broad_genes
				1	7910135	7910597	MGG_16567		pseudogene		broad_genes
				1	7912875	7913337	MGG_16568		pseudogene		broad_genes
				1	7914217	7914679	MGG_16569		pseudogene		broad_genes
				1	7922288	7922602	MGG_16570		protein_coding	Putative uncharacterized protein [Source:UniProtKB/TrEMBL%3BAcc:G4MLW8]	broad_genes	G4MLW8	G4MLW8_MAGO7	unreviewed	Uncharacterized protein	MGG_16570	Magnaporthe oryzae (strain 70-15 / ATCC MYA-4617 / FGSC 8958) (Rice blast fungus) (Pyricularia oryzae)	83
				1	7922816	7923803	MGG_16571		protein_coding	Putative uncharacterized protein [Source:UniProtKB/TrEMBL%3BAcc:G4MLW9]	broad_genes	G4MLW9	G4MLW9_MAGO7	unreviewed	Uncharacterized protein	MGG_16571	Magnaporthe oryzae (strain 70-15 / ATCC MYA-4617 / FGSC 8958) (Rice blast fungus) (Pyricularia oryzae)	155
				1	7923228	7923299	EFMOG00000000335	tRNA-Pseudo	tRNA_pseudogene	tRNA-Pseudo for anticodon GUU [Source:TRNASCAN_SE%3BAcc:tRNA-Pseudo]	ncrna_eg	tRNA-Pseudo
5	IRBlsh-S_2_7171094	2	7171094	2	7121826	7123274	MGG_07290		protein_coding	Putative uncharacterized protein [Source:UniProtKB/TrEMBL%3BAcc:G4MUX7]	broad_genes	G4MUX7	G4MUX7_MAGO7	unreviewed	Uncharacterized protein	MGG_07290	Magnaporthe oryzae (strain 70-15 / ATCC MYA-4617 / FGSC 8958) (Rice blast fungus) (Pyricularia oryzae)	227
				2	7123602	7130125	MGG_07291		protein_coding	CMGC/CDK/CRK7 protein kinase [Source:UniProtKB/TrEMBL%3BAcc:G4MUX8]	broad_genes	G4MUX8	G4MUX8_MAGO7	unreviewed	CMGC/CDK/CRK7 protein kinase	MGG_07291	Magnaporthe oryzae (strain 70-15 / ATCC MYA-4617 / FGSC 8958) (Rice blast fungus) (Pyricularia oryzae)	1198			ATP binding [GO:0005524]; protein kinase activity [GO:0004672]	ATP binding [GO:0005524]; protein kinase activity [GO:0004672]	GO:0004672; GO:0005524
				2	7130014	7131146	MGG_07292		protein_coding	Putative uncharacterized protein [Source:UniProtKB/TrEMBL%3BAcc:G4MUX9]	broad_genes	G4MUX9	G4MUX9_MAGO7	unreviewed	Uncharacterized protein	MGG_07292	Magnaporthe oryzae (strain 70-15 / ATCC MYA-4617 / FGSC 8958) (Rice blast fungus) (Pyricularia oryzae)	282
				2	7131497	7133803	MGG_07293		protein_coding	Malonyl CoA-acyl carrier protein transacylase [Source:UniProtKB/TrEMBL%3BAcc:G4MUY0]	broad_genes	G4MUY0	G4MUY0_MAGO7	unreviewed	Malonyl CoA-acyl carrier protein transacylase	MGG_07293	Magnaporthe oryzae (strain 70-15 / ATCC MYA-4617 / FGSC 8958) (Rice blast fungus) (Pyricularia oryzae)	455			transferase activity [GO:0016740]	transferase activity [GO:0016740]	GO:0016740
				2	7134083	7136000	MGG_07294		protein_coding	Feruloyl esterase B [Source:UniProtKB/TrEMBL%3BAcc:G4MUY1]	broad_genes	G4MUY1	G4MUY1_MAGO7	unreviewed	Carboxylic ester hydrolase (EC 3.1.1.-)	MGG_07294	Magnaporthe oryzae (strain 70-15 / ATCC MYA-4617 / FGSC 8958) (Rice blast fungus) (Pyricularia oryzae)	292	xylan catabolic process [GO:0045493]	extracellular region [GO:0005576]	extracellular region [GO:0005576]; carboxylic ester hydrolase activity [GO:0052689]; xylan catabolic process [GO:0045493]	carboxylic ester hydrolase activity [GO:0052689]	GO:0005576; GO:0045493; GO:0052689
				2	7136200	7137777	MGG_07295		protein_coding	Putative uncharacterized protein [Source:UniProtKB/TrEMBL%3BAcc:G4MUY2]	broad_genes	G4MUY2	G4MUY2_MAGO7	unreviewed	J domain-containing protein	MGG_07295	Magnaporthe oryzae (strain 70-15 / ATCC MYA-4617 / FGSC 8958) (Rice blast fungus) (Pyricularia oryzae)	380
				2	7138306	7141365	MGG_07296		protein_coding	Membrane transporter [Source:UniProtKB/TrEMBL%3BAcc:G4MUY3]	broad_genes	G4MUY3	G4MUY3_MAGO7	unreviewed	Membrane transporter	MGG_07296	Magnaporthe oryzae (strain 70-15 / ATCC MYA-4617 / FGSC 8958) (Rice blast fungus) (Pyricularia oryzae)	598		integral component of membrane [GO:0016021]	integral component of membrane [GO:0016021]; transmembrane transporter activity [GO:0022857]	transmembrane transporter activity [GO:0022857]	GO:0016021; GO:0022857
				2	7141201	7144498	MGG_07297	ATG7	protein_coding	Ubiquitin-like modifier-activating enzyme ATG7 [Source:UniProtKB/Swiss-Prot%3BAcc:Q52CS0]	broad_genes	Q52CS0	ATG7_MAGO7	reviewed	Ubiquitin-like modifier-activating enzyme ATG7 (ATG12-activating enzyme E1 ATG7) (Autophagy-related protein 7)	ATG7 MGG_07297	Magnaporthe oryzae (strain 70-15 / ATCC MYA-4617 / FGSC 8958) (Rice blast fungus) (Pyricularia oryzae)	714	autophagy [GO:0006914]; protein transport [GO:0015031]	phagophore assembly site [GO:0000407]	phagophore assembly site [GO:0000407]; ubiquitin-like modifier activating enzyme activity [GO:0008641]; autophagy [GO:0006914]; protein transport [GO:0015031]	ubiquitin-like modifier activating enzyme activity [GO:0008641]	GO:0000407; GO:0006914; GO:0008641; GO:0015031
				2	7144748	7146317	MGG_07298		protein_coding	Deoxycytidylate deaminase [Source:UniProtKB/TrEMBL%3BAcc:G4MUY5]	broad_genes	G4MUY5	G4MUY5_MAGO7	unreviewed	Deoxycytidylate deaminase	MGG_07298	Magnaporthe oryzae (strain 70-15 / ATCC MYA-4617 / FGSC 8958) (Rice blast fungus) (Pyricularia oryzae)	347			hydrolase activity [GO:0016787]; zinc ion binding [GO:0008270]	hydrolase activity [GO:0016787]; zinc ion binding [GO:0008270]	GO:0008270; GO:0016787
				2	7147325	7147728	MGG_15898		pseudogene		broad_genes
				2	7147825	7148013	MGG_15899		protein_coding	Putative uncharacterized protein [Source:UniProtKB/TrEMBL%3BAcc:G4MUY7]	broad_genes	G4MUY7	G4MUY7_MAGO7	unreviewed	Uncharacterized protein	MGG_15899	Magnaporthe oryzae (strain 70-15 / ATCC MYA-4617 / FGSC 8958) (Rice blast fungus) (Pyricularia oryzae)	62		integral component of membrane [GO:0016021]	integral component of membrane [GO:0016021]		GO:0016021
				2	7148599	7150856	MGG_07300		protein_coding	Cellulose-growth-specific protein [Source:UniProtKB/TrEMBL%3BAcc:G4MUY8]	broad_genes	G4MUY8	G4MUY8_MAGO7	unreviewed	Cellulose-growth-specific protein	MGG_07300	Magnaporthe oryzae (strain 70-15 / ATCC MYA-4617 / FGSC 8958) (Rice blast fungus) (Pyricularia oryzae)	248		extracellular region [GO:0005576]	extracellular region [GO:0005576]		GO:0005576
				2	7151089	7152527	MGG_07301		protein_coding	Putative uncharacterized protein [Source:UniProtKB/TrEMBL%3BAcc:G4MUY9]	broad_genes	G4MUY9	G4MUY9_MAGO7	unreviewed	Uncharacterized protein	MGG_07301	Magnaporthe oryzae (strain 70-15 / ATCC MYA-4617 / FGSC 8958) (Rice blast fungus) (Pyricularia oryzae)	257			2 iron, 2 sulfur cluster binding [GO:0051537]; metal ion binding [GO:0046872]; oxidoreductase activity [GO:0016491]	2 iron, 2 sulfur cluster binding [GO:0051537]; metal ion binding [GO:0046872]; oxidoreductase activity [GO:0016491]	GO:0016491; GO:0046872; GO:0051537
				2	7152424	7154972	MGG_07302		protein_coding	Putative uncharacterized protein [Source:UniProtKB/TrEMBL%3BAcc:G4MUZ0]	broad_genes	G4MUZ0	G4MUZ0_MAGO7	unreviewed	Uncharacterized protein	MGG_07302	Magnaporthe oryzae (strain 70-15 / ATCC MYA-4617 / FGSC 8958) (Rice blast fungus) (Pyricularia oryzae)	629
				2	7155747	7155818	EFMOG00000000220	tRNA-Arg	tRNA_pseudogene	tRNA-Arg for anticodon CCG [Source:TRNASCAN_SE%3BAcc:tRNA-Arg]	ncrna_eg	tRNA-Arg
				2	7155747	7155818	ENSRNA049568972	tRNA-Arg	tRNA	tRNA-Arg for anticodon CCG	trnascan_gene
				2	7156955	7158160	MGG_07303		protein_coding	Putative uncharacterized protein [Source:UniProtKB/TrEMBL%3BAcc:G4MUZ2]	broad_genes	G4MUZ2	G4MUZ2_MAGO7	unreviewed	Uncharacterized protein	MGG_07303	Magnaporthe oryzae (strain 70-15 / ATCC MYA-4617 / FGSC 8958) (Rice blast fungus) (Pyricularia oryzae)	163
				2	7160727	7160984	MGG_07304		protein_coding	Putative uncharacterized protein [Source:UniProtKB/TrEMBL%3BAcc:G4MUZ3]	broad_genes	G4MUZ3	G4MUZ3_MAGO7	unreviewed	Uncharacterized protein	MGG_07304	Magnaporthe oryzae (strain 70-15 / ATCC MYA-4617 / FGSC 8958) (Rice blast fungus) (Pyricularia oryzae)	85
				2	7160852	7163598	MGG_12396		protein_coding	Putative uncharacterized protein [Source:UniProtKB/TrEMBL%3BAcc:G4MUZ4]	broad_genes	G4MUZ4	G4MUZ4_MAGO7	unreviewed	Cytochrome b5 heme-binding domain-containing protein	MGG_12396	Magnaporthe oryzae (strain 70-15 / ATCC MYA-4617 / FGSC 8958) (Rice blast fungus) (Pyricularia oryzae)	122
				2	7163748	7166355	MGG_12397		protein_coding	Putative uncharacterized protein [Source:UniProtKB/TrEMBL%3BAcc:G4MUZ5]	broad_genes	G4MUZ5	G4MUZ5_MAGO7	unreviewed	Uncharacterized protein	MGG_12397	Magnaporthe oryzae (strain 70-15 / ATCC MYA-4617 / FGSC 8958) (Rice blast fungus) (Pyricularia oryzae)	554		integral component of membrane [GO:0016021]	integral component of membrane [GO:0016021]		GO:0016021
				2	7173799	7176070	MGG_07305		protein_coding	Putative uncharacterized protein [Source:UniProtKB/TrEMBL%3BAcc:G4MUZ6]	broad_genes	G4MUZ6	G4MUZ6_MAGO7	unreviewed	BZIP domain-containing protein	MGG_07305	Magnaporthe oryzae (strain 70-15 / ATCC MYA-4617 / FGSC 8958) (Rice blast fungus) (Pyricularia oryzae)	259			DNA-binding transcription factor activity [GO:0003700]	DNA-binding transcription factor activity [GO:0003700]	GO:0003700
				2	7179115	7180110	MGG_15900		protein_coding	Putative uncharacterized protein [Source:UniProtKB/TrEMBL%3BAcc:G4MUZ7]	broad_genes	G4MUZ7	G4MUZ7_MAGO7	unreviewed	Uncharacterized protein	MGG_15900	Magnaporthe oryzae (strain 70-15 / ATCC MYA-4617 / FGSC 8958) (Rice blast fungus) (Pyricularia oryzae)	52
				2	7180272	7182625	MGG_07306		protein_coding	Mixed-linked glucanase [Source:UniProtKB/TrEMBL%3BAcc:G4MUZ8]	broad_genes	G4MUZ8	G4MUZ8_MAGO7	unreviewed	Mixed-linked glucanase	MGG_07306	Magnaporthe oryzae (strain 70-15 / ATCC MYA-4617 / FGSC 8958) (Rice blast fungus) (Pyricularia oryzae)	752	carbohydrate metabolic process [GO:0005975]		hydrolase activity, hydrolyzing O-glycosyl compounds [GO:0004553]; carbohydrate metabolic process [GO:0005975]	hydrolase activity, hydrolyzing O-glycosyl compounds [GO:0004553]	GO:0004553; GO:0005975
				2	7183086	7184668	MGG_07307		protein_coding	NADH-cytochrome b5 reductase 2 [Source:UniProtKB/TrEMBL%3BAcc:G4MUZ9]	broad_genes	G4MUZ9	G4MUZ9_MAGO7	unreviewed	NADH-cytochrome b5 reductase (EC 1.6.2.2)	MGG_07307	Magnaporthe oryzae (strain 70-15 / ATCC MYA-4617 / FGSC 8958) (Rice blast fungus) (Pyricularia oryzae)	308			cytochrome-b5 reductase activity, acting on NAD(P)H [GO:0004128]	cytochrome-b5 reductase activity, acting on NAD(P)H [GO:0004128]	GO:0004128
				2	7185425	7186366	MGG_15089		protein_coding	Putative uncharacterized protein [Source:UniProtKB/TrEMBL%3BAcc:G4MV00]	broad_genes	G4MV00	G4MV00_MAGO7	unreviewed	General transcription and DNA repair factor IIH subunit TFB5	MGG_15089	Magnaporthe oryzae (strain 70-15 / ATCC MYA-4617 / FGSC 8958) (Rice blast fungus) (Pyricularia oryzae)	93	nucleotide-excision repair [GO:0006289]; phosphorylation of RNA polymerase II C-terminal domain [GO:0070816]; transcription initiation from RNA polymerase II promoter [GO:0006367]	cytosol [GO:0005829]; transcription factor TFIIH core complex [GO:0000439]; transcription factor TFIIH holo complex [GO:0005675]	cytosol [GO:0005829]; transcription factor TFIIH core complex [GO:0000439]; transcription factor TFIIH holo complex [GO:0005675]; nucleotide-excision repair [GO:0006289]; phosphorylation of RNA polymerase II C-terminal domain [GO:0070816]; transcription initiation from RNA polymerase II promoter [GO:0006367]		GO:0000439; GO:0005675; GO:0005829; GO:0006289; GO:0006367; GO:0070816
				2	7186222	7187641	MGG_07309		protein_coding	Delta(3%2C5)-Delta(2%2C4)-dienoyl-CoA isomerase [Source:UniProtKB/TrEMBL%3BAcc:G4MV01]	broad_genes	G4MV01	G4MV01_MAGO7	unreviewed	Delta(3,5)-Delta(2,4)-dienoyl-CoA isomerase	MGG_07309	Magnaporthe oryzae (strain 70-15 / ATCC MYA-4617 / FGSC 8958) (Rice blast fungus) (Pyricularia oryzae)	285			isomerase activity [GO:0016853]	isomerase activity [GO:0016853]	GO:0016853
				2	7190095	7194183	MGG_07310		protein_coding	Putative uncharacterized protein [Source:UniProtKB/TrEMBL%3BAcc:G4MV02]	broad_genes	G4MV02	G4MV02_MAGO7	unreviewed	Uncharacterized protein	MGG_07310	Magnaporthe oryzae (strain 70-15 / ATCC MYA-4617 / FGSC 8958) (Rice blast fungus) (Pyricularia oryzae)	1043	establishment of cell polarity [GO:0030010]; Rho protein signal transduction [GO:0007266]	cellular bud [GO:0005933]; cellular bud neck [GO:0005935]; site of polarized growth [GO:0030427]	cellular bud [GO:0005933]; cellular bud neck [GO:0005935]; site of polarized growth [GO:0030427]; phospholipid binding [GO:0005543]; establishment of cell polarity [GO:0030010]; Rho protein signal transduction [GO:0007266]	phospholipid binding [GO:0005543]	GO:0005543; GO:0005933; GO:0005935; GO:0007266; GO:0030010; GO:0030427
				2	7194374	7195777	MGG_07311		protein_coding	Putative uncharacterized protein [Source:UniProtKB/TrEMBL%3BAcc:G4MV03]	broad_genes	G4MV03	G4MV03_MAGO7	unreviewed	Uncharacterized protein	MGG_07311	Magnaporthe oryzae (strain 70-15 / ATCC MYA-4617 / FGSC 8958) (Rice blast fungus) (Pyricularia oryzae)	235
				2	7198208	7203235	MGG_07312		protein_coding	Osmosensing histidine protein kinase SLN1 [Source:UniProtKB/TrEMBL%3BAcc:G4MV04]	broad_genes	G4MV04	G4MV04_MAGO7	unreviewed	Osmosensing histidine protein kinase SLN1	MGG_07312	Magnaporthe oryzae (strain 70-15 / ATCC MYA-4617 / FGSC 8958) (Rice blast fungus) (Pyricularia oryzae)	1201		integral component of membrane [GO:0016021]	integral component of membrane [GO:0016021]; phosphorelay sensor kinase activity [GO:0000155]	phosphorelay sensor kinase activity [GO:0000155]	GO:0000155; GO:0016021
				2	7211277	7214144	MGG_15901		protein_coding	Putative uncharacterized protein [Source:UniProtKB/TrEMBL%3BAcc:G4MV05]	broad_genes	G4MV05	G4MV05_MAGO7	unreviewed	Uncharacterized protein	MGG_15901	Magnaporthe oryzae (strain 70-15 / ATCC MYA-4617 / FGSC 8958) (Rice blast fungus) (Pyricularia oryzae)	709			DNA-binding transcription factor activity [GO:0003700]	DNA-binding transcription factor activity [GO:0003700]	GO:0003700
				2	7214094	7216916	MGG_15902		protein_coding	Putative uncharacterized protein [Source:UniProtKB/TrEMBL%3BAcc:G4MV06]	broad_genes	G4MV06	G4MV06_MAGO7	unreviewed	Uncharacterized protein	MGG_15902	Magnaporthe oryzae (strain 70-15 / ATCC MYA-4617 / FGSC 8958) (Rice blast fungus) (Pyricularia oryzae)	136
				2	7216551	7220924	MGG_07316		protein_coding	FACT complex subunit spt-16 [Source:UniProtKB/TrEMBL%3BAcc:G4MV07]	broad_genes	G4MV07	G4MV07_MAGO7	unreviewed	FACT complex subunit	MGG_07316	Magnaporthe oryzae (strain 70-15 / ATCC MYA-4617 / FGSC 8958) (Rice blast fungus) (Pyricularia oryzae)	1034	chromatin remodeling [GO:0006338]; DNA-dependent DNA replication [GO:0006261]; DNA repair [GO:0006281]; DNA replication-independent nucleosome organization [GO:0034724]; nucleosome assembly [GO:0006334]; positive regulation of RNA polymerase II transcription preinitiation complex assembly [GO:0045899]; regulation of sister chromatid cohesion [GO:0007063]	FACT complex [GO:0035101]; replication fork protection complex [GO:0031298]	FACT complex [GO:0035101]; replication fork protection complex [GO:0031298]; histone binding [GO:0042393]; nucleosome binding [GO:0031491]; chromatin remodeling [GO:0006338]; DNA repair [GO:0006281]; DNA replication-independent nucleosome organization [GO:0034724]; DNA-dependent DNA replication [GO:0006261]; nucleosome assembly [GO:0006334]; positive regulation of RNA polymerase II transcription …	histone binding [GO:0042393]; nucleosome binding [GO:0031491]	GO:0006261; GO:0006281; GO:0006334; GO:0006338; GO:0007063; GO:0031298; GO:0031491; GO:0034724; GO:0035101; GO:0042393; GO:0045899
6	IRBlsh-S_2_2428572	2	2428572	2	2377495	2379752	MGG_08986		protein_coding	Putative uncharacterized protein [Source:UniProtKB/TrEMBL%3BAcc:G4MWH0]	broad_genes	G4MWH0	G4MWH0_MAGO7	unreviewed	Uncharacterized protein	MGG_08986	Magnaporthe oryzae (strain 70-15 / ATCC MYA-4617 / FGSC 8958) (Rice blast fungus) (Pyricularia oryzae)	693
				2	2380692	2383438	MGG_08987		protein_coding	Putative uncharacterized protein [Source:UniProtKB/TrEMBL%3BAcc:G4MWH1]	broad_genes	G4MWH1	G4MWH1_MAGO7	unreviewed	Uncharacterized protein	MGG_08987	Magnaporthe oryzae (strain 70-15 / ATCC MYA-4617 / FGSC 8958) (Rice blast fungus) (Pyricularia oryzae)	882
				2	2384280	2386811	MGG_08988		protein_coding	Putative uncharacterized protein [Source:UniProtKB/TrEMBL%3BAcc:G4MWH2]	broad_genes	G4MWH2	G4MWH2_MAGO7	unreviewed	HET domain-containing protein	MGG_08988	Magnaporthe oryzae (strain 70-15 / ATCC MYA-4617 / FGSC 8958) (Rice blast fungus) (Pyricularia oryzae)	738
				2	2387219	2388678	MGG_08989		protein_coding	Putative uncharacterized protein [Source:UniProtKB/TrEMBL%3BAcc:G4MWH3]	broad_genes	G4MWH3	G4MWH3_MAGO7	unreviewed	Uncharacterized protein	MGG_08989	Magnaporthe oryzae (strain 70-15 / ATCC MYA-4617 / FGSC 8958) (Rice blast fungus) (Pyricularia oryzae)	271			oxidoreductase activity [GO:0016491]	oxidoreductase activity [GO:0016491]	GO:0016491
				2	2389274	2391135	MGG_08990		protein_coding	Putative uncharacterized protein [Source:UniProtKB/TrEMBL%3BAcc:G4MWH4]	broad_genes	G4MWH4	G4MWH4_MAGO7	unreviewed	Uncharacterized protein	MGG_08990	Magnaporthe oryzae (strain 70-15 / ATCC MYA-4617 / FGSC 8958) (Rice blast fungus) (Pyricularia oryzae)	293		integral component of membrane [GO:0016021]	integral component of membrane [GO:0016021]		GO:0016021
				2	2392027	2392332	MGG_15625		protein_coding	Putative uncharacterized protein [Source:UniProtKB/TrEMBL%3BAcc:G4MWH5]	broad_genes	G4MWH5	G4MWH5_MAGO7	unreviewed	Uncharacterized protein	MGG_15625	Magnaporthe oryzae (strain 70-15 / ATCC MYA-4617 / FGSC 8958) (Rice blast fungus) (Pyricularia oryzae)	101
				2	2393589	2393912	MGG_08992		protein_coding	Putative uncharacterized protein [Source:UniProtKB/TrEMBL%3BAcc:G4MWH6]	broad_genes	G4MWH6	G4MWH6_MAGO7	unreviewed	Uncharacterized protein	MGG_08992	Magnaporthe oryzae (strain 70-15 / ATCC MYA-4617 / FGSC 8958) (Rice blast fungus) (Pyricularia oryzae)	107
				2	2393949	2398420	MGG_14768		protein_coding	Putative uncharacterized protein [Source:UniProtKB/TrEMBL%3BAcc:G4MWH7]	broad_genes	G4MWH7	G4MWH7_MAGO7	unreviewed	Uncharacterized protein	MGG_14768	Magnaporthe oryzae (strain 70-15 / ATCC MYA-4617 / FGSC 8958) (Rice blast fungus) (Pyricularia oryzae)	1199	nucleoside metabolic process [GO:0009116]	integral component of membrane [GO:0016021]	integral component of membrane [GO:0016021]; ADP binding [GO:0043531]; catalytic activity [GO:0003824]; nucleoside metabolic process [GO:0009116]	ADP binding [GO:0043531]; catalytic activity [GO:0003824]	GO:0003824; GO:0009116; GO:0016021; GO:0043531
				2	2399031	2400597	MGG_08994		protein_coding	Putative uncharacterized protein [Source:UniProtKB/TrEMBL%3BAcc:G4MWH8]	broad_genes	G4MWH8	G4MWH8_MAGO7	unreviewed	Isochorismatase domain-containing protein	MGG_08994	Magnaporthe oryzae (strain 70-15 / ATCC MYA-4617 / FGSC 8958) (Rice blast fungus) (Pyricularia oryzae)	241
				2	2402252	2402788	MGG_15626		protein_coding	Putative uncharacterized protein [Source:UniProtKB/TrEMBL%3BAcc:G4MWH9]	broad_genes	G4MWH9	G4MWH9_MAGO7	unreviewed	Uncharacterized protein	MGG_15626	Magnaporthe oryzae (strain 70-15 / ATCC MYA-4617 / FGSC 8958) (Rice blast fungus) (Pyricularia oryzae)	67
				2	2410303	2411734	MGG_15627		protein_coding	Putative uncharacterized protein [Source:UniProtKB/TrEMBL%3BAcc:G4MWI0]	broad_genes	G4MWI0	G4MWI0_MAGO7	unreviewed	Uncharacterized protein	MGG_15627	Magnaporthe oryzae (strain 70-15 / ATCC MYA-4617 / FGSC 8958) (Rice blast fungus) (Pyricularia oryzae)	206
				2	2412801	2413727	MGG_08998		protein_coding	Putative uncharacterized protein [Source:UniProtKB/TrEMBL%3BAcc:G4MWI1]	broad_genes	G4MWI1	G4MWI1_MAGO7	unreviewed	Uncharacterized protein	MGG_08998	Magnaporthe oryzae (strain 70-15 / ATCC MYA-4617 / FGSC 8958) (Rice blast fungus) (Pyricularia oryzae)	212		integral component of membrane [GO:0016021]	integral component of membrane [GO:0016021]		GO:0016021
				2	2414047	2414601	MGG_08999		protein_coding	Putative uncharacterized protein [Source:UniProtKB/TrEMBL%3BAcc:G4MWI2]	broad_genes	G4MWI2	G4MWI2_MAGO7	unreviewed	Uncharacterized protein	MGG_08999	Magnaporthe oryzae (strain 70-15 / ATCC MYA-4617 / FGSC 8958) (Rice blast fungus) (Pyricularia oryzae)	184
				2	2415197	2417988	MGG_09000		protein_coding	CMGC/CDK protein kinase [Source:UniProtKB/TrEMBL%3BAcc:G4MWI3]	broad_genes	G4MWI3	G4MWI3_MAGO7	unreviewed	CMGC/CDK protein kinase	MGG_09000	Magnaporthe oryzae (strain 70-15 / ATCC MYA-4617 / FGSC 8958) (Rice blast fungus) (Pyricularia oryzae)	719			ATP binding [GO:0005524]; protein kinase activity [GO:0004672]	ATP binding [GO:0005524]; protein kinase activity [GO:0004672]	GO:0004672; GO:0005524
				2	2419021	2419468	MGG_09001		protein_coding	Putative uncharacterized protein [Source:UniProtKB/TrEMBL%3BAcc:G4MWI4]	broad_genes	G4MWI4	G4MWI4_MAGO7	unreviewed	Uncharacterized protein	MGG_09001	Magnaporthe oryzae (strain 70-15 / ATCC MYA-4617 / FGSC 8958) (Rice blast fungus) (Pyricularia oryzae)	119
				2	2423995	2424886	MGG_15628		protein_coding	Putative uncharacterized protein [Source:UniProtKB/TrEMBL%3BAcc:G4MWI5]	broad_genes	G4MWI5	G4MWI5_MAGO7	unreviewed	Uncharacterized protein	MGG_15628	Magnaporthe oryzae (strain 70-15 / ATCC MYA-4617 / FGSC 8958) (Rice blast fungus) (Pyricularia oryzae)	192
				2	2456936	2457205	MGG_15629		protein_coding	Putative uncharacterized protein [Source:UniProtKB/TrEMBL%3BAcc:G4MWI7]	broad_genes	G4MWI7	G4MWI7_MAGO7	unreviewed	Uncharacterized protein	MGG_15629	Magnaporthe oryzae (strain 70-15 / ATCC MYA-4617 / FGSC 8958) (Rice blast fungus) (Pyricularia oryzae)	59
				2	2457671	2459881	MGG_14499		protein_coding	Serine/threonine protein kinase [Source:UniProtKB/TrEMBL%3BAcc:G4MWI8]	broad_genes	G4MWI8	G4MWI8_MAGO7	unreviewed	Serine/threonine protein kinase	MGG_14499	Magnaporthe oryzae (strain 70-15 / ATCC MYA-4617 / FGSC 8958) (Rice blast fungus) (Pyricularia oryzae)	683			ATP binding [GO:0005524]; protein serine/threonine kinase activity [GO:0004674]	ATP binding [GO:0005524]; protein serine/threonine kinase activity [GO:0004674]	GO:0004674; GO:0005524
				2	2459888	2462277	MGG_01163		protein_coding	Putative uncharacterized protein [Source:UniProtKB/TrEMBL%3BAcc:G4MWI9]	broad_genes	G4MWI9	G4MWI9_MAGO7	unreviewed	Uncharacterized protein	MGG_01163	Magnaporthe oryzae (strain 70-15 / ATCC MYA-4617 / FGSC 8958) (Rice blast fungus) (Pyricularia oryzae)	519		integral component of membrane [GO:0016021]	integral component of membrane [GO:0016021]		GO:0016021
				2	2463487	2463892	MGG_11284		protein_coding	Putative uncharacterized protein [Source:UniProtKB/TrEMBL%3BAcc:G4MWJ0]	broad_genes	G4MWJ0	G4MWJ0_MAGO7	unreviewed	Uncharacterized protein	MGG_11284	Magnaporthe oryzae (strain 70-15 / ATCC MYA-4617 / FGSC 8958) (Rice blast fungus) (Pyricularia oryzae)	65
				2	2464192	2464829	MGG_15630		protein_coding	Putative uncharacterized protein [Source:UniProtKB/TrEMBL%3BAcc:G4MWJ1]	broad_genes	G4MWJ1	G4MWJ1_MAGO7	unreviewed	Uncharacterized protein	MGG_15630	Magnaporthe oryzae (strain 70-15 / ATCC MYA-4617 / FGSC 8958) (Rice blast fungus) (Pyricularia oryzae)	111
				2	2465067	2468189	MGG_01165		protein_coding	Isoleucyl-tRNA synthetase [Source:UniProtKB/TrEMBL%3BAcc:G4MWJ2]	broad_genes	G4MWJ2	G4MWJ2_MAGO7	unreviewed	Isoleucyl-tRNA synthetase (EC 6.1.1.5)	MGG_01165	Magnaporthe oryzae (strain 70-15 / ATCC MYA-4617 / FGSC 8958) (Rice blast fungus) (Pyricularia oryzae)	974	isoleucyl-tRNA aminoacylation [GO:0006428]		aminoacyl-tRNA editing activity [GO:0002161]; ATP binding [GO:0005524]; isoleucine-tRNA ligase activity [GO:0004822]; tRNA binding [GO:0000049]; isoleucyl-tRNA aminoacylation [GO:0006428]	aminoacyl-tRNA editing activity [GO:0002161]; ATP binding [GO:0005524]; isoleucine-tRNA ligase activity [GO:0004822]; tRNA binding [GO:0000049]	GO:0000049; GO:0002161; GO:0004822; GO:0005524; GO:0006428
				2	2468441	2471569	MGG_01166		protein_coding	Putative uncharacterized protein [Source:UniProtKB/TrEMBL%3BAcc:G4MWJ3]	broad_genes	G4MWJ3	G4MWJ3_MAGO7	unreviewed	Uncharacterized protein	MGG_01166	Magnaporthe oryzae (strain 70-15 / ATCC MYA-4617 / FGSC 8958) (Rice blast fungus) (Pyricularia oryzae)	328
7	IRBlsh-S_2_2428518	2	2428518	2	2377495	2379752	MGG_08986		protein_coding	Putative uncharacterized protein [Source:UniProtKB/TrEMBL%3BAcc:G4MWH0]	broad_genes	G4MWH0	G4MWH0_MAGO7	unreviewed	Uncharacterized protein	MGG_08986	Magnaporthe oryzae (strain 70-15 / ATCC MYA-4617 / FGSC 8958) (Rice blast fungus) (Pyricularia oryzae)	693
				2	2380692	2383438	MGG_08987		protein_coding	Putative uncharacterized protein [Source:UniProtKB/TrEMBL%3BAcc:G4MWH1]	broad_genes	G4MWH1	G4MWH1_MAGO7	unreviewed	Uncharacterized protein	MGG_08987	Magnaporthe oryzae (strain 70-15 / ATCC MYA-4617 / FGSC 8958) (Rice blast fungus) (Pyricularia oryzae)	882
				2	2384280	2386811	MGG_08988		protein_coding	Putative uncharacterized protein [Source:UniProtKB/TrEMBL%3BAcc:G4MWH2]	broad_genes	G4MWH2	G4MWH2_MAGO7	unreviewed	HET domain-containing protein	MGG_08988	Magnaporthe oryzae (strain 70-15 / ATCC MYA-4617 / FGSC 8958) (Rice blast fungus) (Pyricularia oryzae)	738
				2	2387219	2388678	MGG_08989		protein_coding	Putative uncharacterized protein [Source:UniProtKB/TrEMBL%3BAcc:G4MWH3]	broad_genes	G4MWH3	G4MWH3_MAGO7	unreviewed	Uncharacterized protein	MGG_08989	Magnaporthe oryzae (strain 70-15 / ATCC MYA-4617 / FGSC 8958) (Rice blast fungus) (Pyricularia oryzae)	271			oxidoreductase activity [GO:0016491]	oxidoreductase activity [GO:0016491]	GO:0016491
				2	2389274	2391135	MGG_08990		protein_coding	Putative uncharacterized protein [Source:UniProtKB/TrEMBL%3BAcc:G4MWH4]	broad_genes	G4MWH4	G4MWH4_MAGO7	unreviewed	Uncharacterized protein	MGG_08990	Magnaporthe oryzae (strain 70-15 / ATCC MYA-4617 / FGSC 8958) (Rice blast fungus) (Pyricularia oryzae)	293		integral component of membrane [GO:0016021]	integral component of membrane [GO:0016021]		GO:0016021
				2	2392027	2392332	MGG_15625		protein_coding	Putative uncharacterized protein [Source:UniProtKB/TrEMBL%3BAcc:G4MWH5]	broad_genes	G4MWH5	G4MWH5_MAGO7	unreviewed	Uncharacterized protein	MGG_15625	Magnaporthe oryzae (strain 70-15 / ATCC MYA-4617 / FGSC 8958) (Rice blast fungus) (Pyricularia oryzae)	101
				2	2393589	2393912	MGG_08992		protein_coding	Putative uncharacterized protein [Source:UniProtKB/TrEMBL%3BAcc:G4MWH6]	broad_genes	G4MWH6	G4MWH6_MAGO7	unreviewed	Uncharacterized protein	MGG_08992	Magnaporthe oryzae (strain 70-15 / ATCC MYA-4617 / FGSC 8958) (Rice blast fungus) (Pyricularia oryzae)	107
				2	2393949	2398420	MGG_14768		protein_coding	Putative uncharacterized protein [Source:UniProtKB/TrEMBL%3BAcc:G4MWH7]	broad_genes	G4MWH7	G4MWH7_MAGO7	unreviewed	Uncharacterized protein	MGG_14768	Magnaporthe oryzae (strain 70-15 / ATCC MYA-4617 / FGSC 8958) (Rice blast fungus) (Pyricularia oryzae)	1199	nucleoside metabolic process [GO:0009116]	integral component of membrane [GO:0016021]	integral component of membrane [GO:0016021]; ADP binding [GO:0043531]; catalytic activity [GO:0003824]; nucleoside metabolic process [GO:0009116]	ADP binding [GO:0043531]; catalytic activity [GO:0003824]	GO:0003824; GO:0009116; GO:0016021; GO:0043531
				2	2399031	2400597	MGG_08994		protein_coding	Putative uncharacterized protein [Source:UniProtKB/TrEMBL%3BAcc:G4MWH8]	broad_genes	G4MWH8	G4MWH8_MAGO7	unreviewed	Isochorismatase domain-containing protein	MGG_08994	Magnaporthe oryzae (strain 70-15 / ATCC MYA-4617 / FGSC 8958) (Rice blast fungus) (Pyricularia oryzae)	241
				2	2402252	2402788	MGG_15626		protein_coding	Putative uncharacterized protein [Source:UniProtKB/TrEMBL%3BAcc:G4MWH9]	broad_genes	G4MWH9	G4MWH9_MAGO7	unreviewed	Uncharacterized protein	MGG_15626	Magnaporthe oryzae (strain 70-15 / ATCC MYA-4617 / FGSC 8958) (Rice blast fungus) (Pyricularia oryzae)	67
				2	2410303	2411734	MGG_15627		protein_coding	Putative uncharacterized protein [Source:UniProtKB/TrEMBL%3BAcc:G4MWI0]	broad_genes	G4MWI0	G4MWI0_MAGO7	unreviewed	Uncharacterized protein	MGG_15627	Magnaporthe oryzae (strain 70-15 / ATCC MYA-4617 / FGSC 8958) (Rice blast fungus) (Pyricularia oryzae)	206
				2	2412801	2413727	MGG_08998		protein_coding	Putative uncharacterized protein [Source:UniProtKB/TrEMBL%3BAcc:G4MWI1]	broad_genes	G4MWI1	G4MWI1_MAGO7	unreviewed	Uncharacterized protein	MGG_08998	Magnaporthe oryzae (strain 70-15 / ATCC MYA-4617 / FGSC 8958) (Rice blast fungus) (Pyricularia oryzae)	212		integral component of membrane [GO:0016021]	integral component of membrane [GO:0016021]		GO:0016021
				2	2414047	2414601	MGG_08999		protein_coding	Putative uncharacterized protein [Source:UniProtKB/TrEMBL%3BAcc:G4MWI2]	broad_genes	G4MWI2	G4MWI2_MAGO7	unreviewed	Uncharacterized protein	MGG_08999	Magnaporthe oryzae (strain 70-15 / ATCC MYA-4617 / FGSC 8958) (Rice blast fungus) (Pyricularia oryzae)	184
				2	2415197	2417988	MGG_09000		protein_coding	CMGC/CDK protein kinase [Source:UniProtKB/TrEMBL%3BAcc:G4MWI3]	broad_genes	G4MWI3	G4MWI3_MAGO7	unreviewed	CMGC/CDK protein kinase	MGG_09000	Magnaporthe oryzae (strain 70-15 / ATCC MYA-4617 / FGSC 8958) (Rice blast fungus) (Pyricularia oryzae)	719			ATP binding [GO:0005524]; protein kinase activity [GO:0004672]	ATP binding [GO:0005524]; protein kinase activity [GO:0004672]	GO:0004672; GO:0005524
				2	2419021	2419468	MGG_09001		protein_coding	Putative uncharacterized protein [Source:UniProtKB/TrEMBL%3BAcc:G4MWI4]	broad_genes	G4MWI4	G4MWI4_MAGO7	unreviewed	Uncharacterized protein	MGG_09001	Magnaporthe oryzae (strain 70-15 / ATCC MYA-4617 / FGSC 8958) (Rice blast fungus) (Pyricularia oryzae)	119
				2	2423995	2424886	MGG_15628		protein_coding	Putative uncharacterized protein [Source:UniProtKB/TrEMBL%3BAcc:G4MWI5]	broad_genes	G4MWI5	G4MWI5_MAGO7	unreviewed	Uncharacterized protein	MGG_15628	Magnaporthe oryzae (strain 70-15 / ATCC MYA-4617 / FGSC 8958) (Rice blast fungus) (Pyricularia oryzae)	192
				2	2456936	2457205	MGG_15629		protein_coding	Putative uncharacterized protein [Source:UniProtKB/TrEMBL%3BAcc:G4MWI7]	broad_genes	G4MWI7	G4MWI7_MAGO7	unreviewed	Uncharacterized protein	MGG_15629	Magnaporthe oryzae (strain 70-15 / ATCC MYA-4617 / FGSC 8958) (Rice blast fungus) (Pyricularia oryzae)	59
				2	2457671	2459881	MGG_14499		protein_coding	Serine/threonine protein kinase [Source:UniProtKB/TrEMBL%3BAcc:G4MWI8]	broad_genes	G4MWI8	G4MWI8_MAGO7	unreviewed	Serine/threonine protein kinase	MGG_14499	Magnaporthe oryzae (strain 70-15 / ATCC MYA-4617 / FGSC 8958) (Rice blast fungus) (Pyricularia oryzae)	683			ATP binding [GO:0005524]; protein serine/threonine kinase activity [GO:0004674]	ATP binding [GO:0005524]; protein serine/threonine kinase activity [GO:0004674]	GO:0004674; GO:0005524
				2	2459888	2462277	MGG_01163		protein_coding	Putative uncharacterized protein [Source:UniProtKB/TrEMBL%3BAcc:G4MWI9]	broad_genes	G4MWI9	G4MWI9_MAGO7	unreviewed	Uncharacterized protein	MGG_01163	Magnaporthe oryzae (strain 70-15 / ATCC MYA-4617 / FGSC 8958) (Rice blast fungus) (Pyricularia oryzae)	519		integral component of membrane [GO:0016021]	integral component of membrane [GO:0016021]		GO:0016021
				2	2463487	2463892	MGG_11284		protein_coding	Putative uncharacterized protein [Source:UniProtKB/TrEMBL%3BAcc:G4MWJ0]	broad_genes	G4MWJ0	G4MWJ0_MAGO7	unreviewed	Uncharacterized protein	MGG_11284	Magnaporthe oryzae (strain 70-15 / ATCC MYA-4617 / FGSC 8958) (Rice blast fungus) (Pyricularia oryzae)	65
				2	2464192	2464829	MGG_15630		protein_coding	Putative uncharacterized protein [Source:UniProtKB/TrEMBL%3BAcc:G4MWJ1]	broad_genes	G4MWJ1	G4MWJ1_MAGO7	unreviewed	Uncharacterized protein	MGG_15630	Magnaporthe oryzae (strain 70-15 / ATCC MYA-4617 / FGSC 8958) (Rice blast fungus) (Pyricularia oryzae)	111
				2	2465067	2468189	MGG_01165		protein_coding	Isoleucyl-tRNA synthetase [Source:UniProtKB/TrEMBL%3BAcc:G4MWJ2]	broad_genes	G4MWJ2	G4MWJ2_MAGO7	unreviewed	Isoleucyl-tRNA synthetase (EC 6.1.1.5)	MGG_01165	Magnaporthe oryzae (strain 70-15 / ATCC MYA-4617 / FGSC 8958) (Rice blast fungus) (Pyricularia oryzae)	974	isoleucyl-tRNA aminoacylation [GO:0006428]		aminoacyl-tRNA editing activity [GO:0002161]; ATP binding [GO:0005524]; isoleucine-tRNA ligase activity [GO:0004822]; tRNA binding [GO:0000049]; isoleucyl-tRNA aminoacylation [GO:0006428]	aminoacyl-tRNA editing activity [GO:0002161]; ATP binding [GO:0005524]; isoleucine-tRNA ligase activity [GO:0004822]; tRNA binding [GO:0000049]	GO:0000049; GO:0002161; GO:0004822; GO:0005524; GO:0006428
				2	2468441	2471569	MGG_01166		protein_coding	Putative uncharacterized protein [Source:UniProtKB/TrEMBL%3BAcc:G4MWJ3]	broad_genes	G4MWJ3	G4MWJ3_MAGO7	unreviewed	Uncharacterized protein	MGG_01166	Magnaporthe oryzae (strain 70-15 / ATCC MYA-4617 / FGSC 8958) (Rice blast fungus) (Pyricularia oryzae)	328
8	IRBlsh-S_2_2406970	2	2406970	2	2354464	2357710	MGG_08979		protein_coding	Putative uncharacterized protein [Source:UniProtKB/TrEMBL%3BAcc:G4MWG3]	broad_genes	G4MWG3	G4MWG3_MAGO7	unreviewed	Uncharacterized protein	MGG_08979	Magnaporthe oryzae (strain 70-15 / ATCC MYA-4617 / FGSC 8958) (Rice blast fungus) (Pyricularia oryzae)	937
				2	2358065	2360432	MGG_08980		protein_coding	Stress-induced-phosphoprotein 1 [Source:UniProtKB/TrEMBL%3BAcc:G4MWG4]	broad_genes	G4MWG4	G4MWG4_MAGO7	unreviewed	Stress-induced-phosphoprotein 1	MGG_08980	Magnaporthe oryzae (strain 70-15 / ATCC MYA-4617 / FGSC 8958) (Rice blast fungus) (Pyricularia oryzae)	584
				2	2360803	2362335	MGG_08981		protein_coding	Putative uncharacterized protein [Source:UniProtKB/TrEMBL%3BAcc:G4MWG5]	broad_genes	G4MWG5	G4MWG5_MAGO7	unreviewed	Uncharacterized protein	MGG_08981	Magnaporthe oryzae (strain 70-15 / ATCC MYA-4617 / FGSC 8958) (Rice blast fungus) (Pyricularia oryzae)	410		integral component of membrane [GO:0016021]	integral component of membrane [GO:0016021]		GO:0016021
				2	2363070	2364071	MGG_08982		protein_coding	Putative uncharacterized protein [Source:UniProtKB/TrEMBL%3BAcc:G4MWG6]	broad_genes	G4MWG6	G4MWG6_MAGO7	unreviewed	Uncharacterized protein	MGG_08982	Magnaporthe oryzae (strain 70-15 / ATCC MYA-4617 / FGSC 8958) (Rice blast fungus) (Pyricularia oryzae)	333		integral component of membrane [GO:0016021]	integral component of membrane [GO:0016021]		GO:0016021
				2	2366817	2368288	MGG_08983		protein_coding	Catechol 1%2C2-dioxygenase 1 [Source:UniProtKB/TrEMBL%3BAcc:G4MWG7]	broad_genes	G4MWG7	G4MWG7_MAGO7	unreviewed	Catechol 1,2-dioxygenase 1	MGG_08983	Magnaporthe oryzae (strain 70-15 / ATCC MYA-4617 / FGSC 8958) (Rice blast fungus) (Pyricularia oryzae)	319	aromatic compound catabolic process [GO:0019439]; catechol-containing compound metabolic process [GO:0009712]		catechol 1,2-dioxygenase activity [GO:0018576]; ferric iron binding [GO:0008199]; aromatic compound catabolic process [GO:0019439]; catechol-containing compound metabolic process [GO:0009712]	catechol 1,2-dioxygenase activity [GO:0018576]; ferric iron binding [GO:0008199]	GO:0008199; GO:0009712; GO:0018576; GO:0019439
				2	2369983	2373093	MGG_08984		protein_coding	Putative uncharacterized protein [Source:UniProtKB/TrEMBL%3BAcc:G4MWG8]	broad_genes	G4MWG8	G4MWG8_MAGO7	unreviewed	Uncharacterized protein	MGG_08984	Magnaporthe oryzae (strain 70-15 / ATCC MYA-4617 / FGSC 8958) (Rice blast fungus) (Pyricularia oryzae)	926	transmembrane transport [GO:0055085]	integral component of membrane [GO:0016021]	integral component of membrane [GO:0016021]; transmembrane transport [GO:0055085]		GO:0016021; GO:0055085
				2	2373986	2377270	MGG_08985		protein_coding	Beta-xylosidase [Source:UniProtKB/TrEMBL%3BAcc:G4MWG9]	broad_genes	G4MWG9	G4MWG9_MAGO7	unreviewed	Beta-xylosidase	MGG_08985	Magnaporthe oryzae (strain 70-15 / ATCC MYA-4617 / FGSC 8958) (Rice blast fungus) (Pyricularia oryzae)	847	polysaccharide catabolic process [GO:0000272]	integral component of membrane [GO:0016021]	integral component of membrane [GO:0016021]; hydrolase activity, hydrolyzing O-glycosyl compounds [GO:0004553]; polysaccharide catabolic process [GO:0000272]	hydrolase activity, hydrolyzing O-glycosyl compounds [GO:0004553]	GO:0000272; GO:0004553; GO:0016021
				2	2377495	2379752	MGG_08986		protein_coding	Putative uncharacterized protein [Source:UniProtKB/TrEMBL%3BAcc:G4MWH0]	broad_genes	G4MWH0	G4MWH0_MAGO7	unreviewed	Uncharacterized protein	MGG_08986	Magnaporthe oryzae (strain 70-15 / ATCC MYA-4617 / FGSC 8958) (Rice blast fungus) (Pyricularia oryzae)	693
				2	2380692	2383438	MGG_08987		protein_coding	Putative uncharacterized protein [Source:UniProtKB/TrEMBL%3BAcc:G4MWH1]	broad_genes	G4MWH1	G4MWH1_MAGO7	unreviewed	Uncharacterized protein	MGG_08987	Magnaporthe oryzae (strain 70-15 / ATCC MYA-4617 / FGSC 8958) (Rice blast fungus) (Pyricularia oryzae)	882
				2	2384280	2386811	MGG_08988		protein_coding	Putative uncharacterized protein [Source:UniProtKB/TrEMBL%3BAcc:G4MWH2]	broad_genes	G4MWH2	G4MWH2_MAGO7	unreviewed	HET domain-containing protein	MGG_08988	Magnaporthe oryzae (strain 70-15 / ATCC MYA-4617 / FGSC 8958) (Rice blast fungus) (Pyricularia oryzae)	738
				2	2387219	2388678	MGG_08989		protein_coding	Putative uncharacterized protein [Source:UniProtKB/TrEMBL%3BAcc:G4MWH3]	broad_genes	G4MWH3	G4MWH3_MAGO7	unreviewed	Uncharacterized protein	MGG_08989	Magnaporthe oryzae (strain 70-15 / ATCC MYA-4617 / FGSC 8958) (Rice blast fungus) (Pyricularia oryzae)	271			oxidoreductase activity [GO:0016491]	oxidoreductase activity [GO:0016491]	GO:0016491
				2	2389274	2391135	MGG_08990		protein_coding	Putative uncharacterized protein [Source:UniProtKB/TrEMBL%3BAcc:G4MWH4]	broad_genes	G4MWH4	G4MWH4_MAGO7	unreviewed	Uncharacterized protein	MGG_08990	Magnaporthe oryzae (strain 70-15 / ATCC MYA-4617 / FGSC 8958) (Rice blast fungus) (Pyricularia oryzae)	293		integral component of membrane [GO:0016021]	integral component of membrane [GO:0016021]		GO:0016021
				2	2392027	2392332	MGG_15625		protein_coding	Putative uncharacterized protein [Source:UniProtKB/TrEMBL%3BAcc:G4MWH5]	broad_genes	G4MWH5	G4MWH5_MAGO7	unreviewed	Uncharacterized protein	MGG_15625	Magnaporthe oryzae (strain 70-15 / ATCC MYA-4617 / FGSC 8958) (Rice blast fungus) (Pyricularia oryzae)	101
				2	2393589	2393912	MGG_08992		protein_coding	Putative uncharacterized protein [Source:UniProtKB/TrEMBL%3BAcc:G4MWH6]	broad_genes	G4MWH6	G4MWH6_MAGO7	unreviewed	Uncharacterized protein	MGG_08992	Magnaporthe oryzae (strain 70-15 / ATCC MYA-4617 / FGSC 8958) (Rice blast fungus) (Pyricularia oryzae)	107
				2	2393949	2398420	MGG_14768		protein_coding	Putative uncharacterized protein [Source:UniProtKB/TrEMBL%3BAcc:G4MWH7]	broad_genes	G4MWH7	G4MWH7_MAGO7	unreviewed	Uncharacterized protein	MGG_14768	Magnaporthe oryzae (strain 70-15 / ATCC MYA-4617 / FGSC 8958) (Rice blast fungus) (Pyricularia oryzae)	1199	nucleoside metabolic process [GO:0009116]	integral component of membrane [GO:0016021]	integral component of membrane [GO:0016021]; ADP binding [GO:0043531]; catalytic activity [GO:0003824]; nucleoside metabolic process [GO:0009116]	ADP binding [GO:0043531]; catalytic activity [GO:0003824]	GO:0003824; GO:0009116; GO:0016021; GO:0043531
				2	2399031	2400597	MGG_08994		protein_coding	Putative uncharacterized protein [Source:UniProtKB/TrEMBL%3BAcc:G4MWH8]	broad_genes	G4MWH8	G4MWH8_MAGO7	unreviewed	Isochorismatase domain-containing protein	MGG_08994	Magnaporthe oryzae (strain 70-15 / ATCC MYA-4617 / FGSC 8958) (Rice blast fungus) (Pyricularia oryzae)	241
				2	2402252	2402788	MGG_15626		protein_coding	Putative uncharacterized protein [Source:UniProtKB/TrEMBL%3BAcc:G4MWH9]	broad_genes	G4MWH9	G4MWH9_MAGO7	unreviewed	Uncharacterized protein	MGG_15626	Magnaporthe oryzae (strain 70-15 / ATCC MYA-4617 / FGSC 8958) (Rice blast fungus) (Pyricularia oryzae)	67
				2	2410303	2411734	MGG_15627		protein_coding	Putative uncharacterized protein [Source:UniProtKB/TrEMBL%3BAcc:G4MWI0]	broad_genes	G4MWI0	G4MWI0_MAGO7	unreviewed	Uncharacterized protein	MGG_15627	Magnaporthe oryzae (strain 70-15 / ATCC MYA-4617 / FGSC 8958) (Rice blast fungus) (Pyricularia oryzae)	206
				2	2412801	2413727	MGG_08998		protein_coding	Putative uncharacterized protein [Source:UniProtKB/TrEMBL%3BAcc:G4MWI1]	broad_genes	G4MWI1	G4MWI1_MAGO7	unreviewed	Uncharacterized protein	MGG_08998	Magnaporthe oryzae (strain 70-15 / ATCC MYA-4617 / FGSC 8958) (Rice blast fungus) (Pyricularia oryzae)	212		integral component of membrane [GO:0016021]	integral component of membrane [GO:0016021]		GO:0016021
				2	2414047	2414601	MGG_08999		protein_coding	Putative uncharacterized protein [Source:UniProtKB/TrEMBL%3BAcc:G4MWI2]	broad_genes	G4MWI2	G4MWI2_MAGO7	unreviewed	Uncharacterized protein	MGG_08999	Magnaporthe oryzae (strain 70-15 / ATCC MYA-4617 / FGSC 8958) (Rice blast fungus) (Pyricularia oryzae)	184
				2	2415197	2417988	MGG_09000		protein_coding	CMGC/CDK protein kinase [Source:UniProtKB/TrEMBL%3BAcc:G4MWI3]	broad_genes	G4MWI3	G4MWI3_MAGO7	unreviewed	CMGC/CDK protein kinase	MGG_09000	Magnaporthe oryzae (strain 70-15 / ATCC MYA-4617 / FGSC 8958) (Rice blast fungus) (Pyricularia oryzae)	719			ATP binding [GO:0005524]; protein kinase activity [GO:0004672]	ATP binding [GO:0005524]; protein kinase activity [GO:0004672]	GO:0004672; GO:0005524
				2	2419021	2419468	MGG_09001		protein_coding	Putative uncharacterized protein [Source:UniProtKB/TrEMBL%3BAcc:G4MWI4]	broad_genes	G4MWI4	G4MWI4_MAGO7	unreviewed	Uncharacterized protein	MGG_09001	Magnaporthe oryzae (strain 70-15 / ATCC MYA-4617 / FGSC 8958) (Rice blast fungus) (Pyricularia oryzae)	119
				2	2423995	2424886	MGG_15628		protein_coding	Putative uncharacterized protein [Source:UniProtKB/TrEMBL%3BAcc:G4MWI5]	broad_genes	G4MWI5	G4MWI5_MAGO7	unreviewed	Uncharacterized protein	MGG_15628	Magnaporthe oryzae (strain 70-15 / ATCC MYA-4617 / FGSC 8958) (Rice blast fungus) (Pyricularia oryzae)	192
				2	2456936	2457205	MGG_15629		protein_coding	Putative uncharacterized protein [Source:UniProtKB/TrEMBL%3BAcc:G4MWI7]	broad_genes	G4MWI7	G4MWI7_MAGO7	unreviewed	Uncharacterized protein	MGG_15629	Magnaporthe oryzae (strain 70-15 / ATCC MYA-4617 / FGSC 8958) (Rice blast fungus) (Pyricularia oryzae)	59
9	IRBlsh-S_3_254639	3	254639	3	205857	205928	EFMOG00000000374	tRNA-Pseudo	tRNA_pseudogene	tRNA-Pseudo for anticodon GUU [Source:TRNASCAN_SE%3BAcc:tRNA-Pseudo]	ncrna_eg	tRNA-Pseudo
				3	206231	207694	MGG_09109		protein_coding	Putative uncharacterized protein [Source:UniProtKB/TrEMBL%3BAcc:G4MZW5]	broad_genes	G4MZW5	G4MZW5_MAGO7	unreviewed	DUF1996 domain-containing protein	MGG_09109	Magnaporthe oryzae (strain 70-15 / ATCC MYA-4617 / FGSC 8958) (Rice blast fungus) (Pyricularia oryzae)	354
				3	214272	214592	MGG_16592		protein_coding	Putative uncharacterized protein [Source:UniProtKB/TrEMBL%3BAcc:G4MZW6]	broad_genes	G4MZW6	G4MZW6_MAGO7	unreviewed	Uncharacterized protein	MGG_16592	Magnaporthe oryzae (strain 70-15 / ATCC MYA-4617 / FGSC 8958) (Rice blast fungus) (Pyricularia oryzae)	106
				3	214335	216759	MGG_09110		protein_coding	Putative uncharacterized protein [Source:UniProtKB/TrEMBL%3BAcc:G4MZW7]	broad_genes	G4MZW7	G4MZW7_MAGO7	unreviewed	Uncharacterized protein	MGG_09110	Magnaporthe oryzae (strain 70-15 / ATCC MYA-4617 / FGSC 8958) (Rice blast fungus) (Pyricularia oryzae)	456
				3	220195	220563	MGG_16593		protein_coding	Putative uncharacterized protein [Source:UniProtKB/TrEMBL%3BAcc:G4MZW8]	broad_genes	G4MZW8	G4MZW8_MAGO7	unreviewed	Uncharacterized protein	MGG_16593	Magnaporthe oryzae (strain 70-15 / ATCC MYA-4617 / FGSC 8958) (Rice blast fungus) (Pyricularia oryzae)	56
				3	222839	224016	MGG_13346		protein_coding	Putative uncharacterized protein [Source:UniProtKB/TrEMBL%3BAcc:G4MZW9]	broad_genes	G4MZW9	G4MZW9_MAGO7	unreviewed	Uncharacterized protein	MGG_13346	Magnaporthe oryzae (strain 70-15 / ATCC MYA-4617 / FGSC 8958) (Rice blast fungus) (Pyricularia oryzae)	131
				3	224499	226464	MGG_09114		protein_coding	Putative uncharacterized protein [Source:UniProtKB/TrEMBL%3BAcc:G4MZX0]	broad_genes	G4MZX0	G4MZX0_MAGO7	unreviewed	BTB domain-containing protein	MGG_09114	Magnaporthe oryzae (strain 70-15 / ATCC MYA-4617 / FGSC 8958) (Rice blast fungus) (Pyricularia oryzae)	285
				3	226776	229522	MGG_13347		protein_coding	Integral membrane protein [Source:UniProtKB/TrEMBL%3BAcc:G4MZX1]	broad_genes	G4MZX1	G4MZX1_MAGO7	unreviewed	Integral membrane protein	MGG_13347	Magnaporthe oryzae (strain 70-15 / ATCC MYA-4617 / FGSC 8958) (Rice blast fungus) (Pyricularia oryzae)	463		integral component of membrane [GO:0016021]	integral component of membrane [GO:0016021]		GO:0016021
				3	232333	232561	MGG_16594		protein_coding	Putative uncharacterized protein [Source:UniProtKB/TrEMBL%3BAcc:G4MZX2]	broad_genes	G4MZX2	G4MZX2_MAGO7	unreviewed	Uncharacterized protein	MGG_16594	Magnaporthe oryzae (strain 70-15 / ATCC MYA-4617 / FGSC 8958) (Rice blast fungus) (Pyricularia oryzae)	58
				3	234380	237020	MGG_16595		protein_coding	Putative uncharacterized protein [Source:UniProtKB/TrEMBL%3BAcc:G4MZX3]	broad_genes	G4MZX3	G4MZX3_MAGO7	unreviewed	Uncharacterized protein	MGG_16595	Magnaporthe oryzae (strain 70-15 / ATCC MYA-4617 / FGSC 8958) (Rice blast fungus) (Pyricularia oryzae)	481
				3	236966	240252	MGG_16596		protein_coding	Putative uncharacterized protein [Source:UniProtKB/TrEMBL%3BAcc:G4MZX4]	broad_genes	G4MZX4	G4MZX4_MAGO7	unreviewed	Uncharacterized protein	MGG_16596	Magnaporthe oryzae (strain 70-15 / ATCC MYA-4617 / FGSC 8958) (Rice blast fungus) (Pyricularia oryzae)	813	carbohydrate metabolic process [GO:0005975]		aldehyde-lyase activity [GO:0016832]; carbohydrate metabolic process [GO:0005975]	aldehyde-lyase activity [GO:0016832]	GO:0005975; GO:0016832
				3	240120	241532	MGG_09117		protein_coding	Putative uncharacterized protein [Source:UniProtKB/TrEMBL%3BAcc:G4MZX5]	broad_genes	G4MZX5	G4MZX5_MAGO7	unreviewed	Uncharacterized protein	MGG_09117	Magnaporthe oryzae (strain 70-15 / ATCC MYA-4617 / FGSC 8958) (Rice blast fungus) (Pyricularia oryzae)	433		integral component of membrane [GO:0016021]	integral component of membrane [GO:0016021]		GO:0016021
				3	243059	246231	MGG_09118		protein_coding	Putative uncharacterized protein [Source:UniProtKB/TrEMBL%3BAcc:G4MZX6]	broad_genes	G4MZX6	G4MZX6_MAGO7	unreviewed	Zn(2)-C6 fungal-type domain-containing protein	MGG_09118	Magnaporthe oryzae (strain 70-15 / ATCC MYA-4617 / FGSC 8958) (Rice blast fungus) (Pyricularia oryzae)	803	transcription, DNA-templated [GO:0006351]	nucleus [GO:0005634]	nucleus [GO:0005634]; DNA binding [GO:0003677]; DNA-binding transcription factor activity, RNA polymerase II-specific [GO:0000981]; zinc ion binding [GO:0008270]; transcription, DNA-templated [GO:0006351]	DNA binding [GO:0003677]; DNA-binding transcription factor activity, RNA polymerase II-specific [GO:0000981]; zinc ion binding [GO:0008270]	GO:0000981; GO:0003677; GO:0005634; GO:0006351; GO:0008270
				3	245969	247908	MGG_13349		protein_coding	HAL protein kinase [Source:UniProtKB/TrEMBL%3BAcc:G4MZX7]	broad_genes	G4MZX7	G4MZX7_MAGO7	unreviewed	HAL protein kinase	MGG_13349	Magnaporthe oryzae (strain 70-15 / ATCC MYA-4617 / FGSC 8958) (Rice blast fungus) (Pyricularia oryzae)	403			ATP binding [GO:0005524]; protein kinase activity [GO:0004672]	ATP binding [GO:0005524]; protein kinase activity [GO:0004672]	GO:0004672; GO:0005524
				3	248371	251831	MGG_09119		protein_coding	Potassium transporter [Source:UniProtKB/TrEMBL%3BAcc:G4N084]	broad_genes	G4N084	G4N084_MAGO7	unreviewed	Potassium transporter	MGG_09119	Magnaporthe oryzae (strain 70-15 / ATCC MYA-4617 / FGSC 8958) (Rice blast fungus) (Pyricularia oryzae)	677	cellular potassium ion homeostasis [GO:0030007]	integral component of plasma membrane [GO:0005887]	integral component of plasma membrane [GO:0005887]; potassium ion transmembrane transporter activity [GO:0015079]; cellular potassium ion homeostasis [GO:0030007]	potassium ion transmembrane transporter activity [GO:0015079]	GO:0005887; GO:0015079; GO:0030007
				3	254844	255306	MGG_16597		pseudogene		broad_genes
				3	268734	269196	MGG_16598		pseudogene		broad_genes
				3	286981	287443	MGG_16599		pseudogene		broad_genes
				3	291606	292055	MGG_09144		protein_coding	Putative uncharacterized protein [Source:UniProtKB/TrEMBL%3BAcc:G5EHB8]	broad_genes	G5EHB8	G5EHB8_MAGO7	unreviewed	Uncharacterized protein	MGCH7_ch7g946 MGG_09144	Magnaporthe oryzae (strain 70-15 / ATCC MYA-4617 / FGSC 8958) (Rice blast fungus) (Pyricularia oryzae)	149		extracellular space [GO:0005615]	extracellular space [GO:0005615]; toxin activity [GO:0090729]	toxin activity [GO:0090729]	GO:0005615; GO:0090729
				3	292697	293508	MGG_16600		protein_coding	Putative uncharacterized protein [Source:UniProtKB/TrEMBL%3BAcc:G5EHF1]	broad_genes	G5EHF1	G5EHF1_MAGO7	unreviewed	Uncharacterized protein	MGCH7_ch7g947 MGG_16600	Magnaporthe oryzae (strain 70-15 / ATCC MYA-4617 / FGSC 8958) (Rice blast fungus) (Pyricularia oryzae)	207
				3	294127	295792	MGG_09146		protein_coding	RTA1 domain-containing protein [Source:UniProtKB/TrEMBL%3BAcc:G5EHQ1]	broad_genes	G5EHQ1	G5EHQ1_MAGO7	unreviewed	RTA1 domain-containing protein	MGCH7_ch7g948 MGG_09146	Magnaporthe oryzae (strain 70-15 / ATCC MYA-4617 / FGSC 8958) (Rice blast fungus) (Pyricularia oryzae)	295		integral component of membrane [GO:0016021]	integral component of membrane [GO:0016021]		GO:0016021
				3	295827	296873	MGG_09147		protein_coding	Putative uncharacterized protein [Source:UniProtKB/TrEMBL%3BAcc:G5EH46]	broad_genes	G5EH46	G5EH46_MAGO7	unreviewed	Uncharacterized protein	MGCH7_ch7g949 MGG_09147	Magnaporthe oryzae (strain 70-15 / ATCC MYA-4617 / FGSC 8958) (Rice blast fungus) (Pyricularia oryzae)	348
				3	297557	298849	MGG_09148		protein_coding	Putative uncharacterized protein [Source:UniProtKB/TrEMBL%3BAcc:G4N092]	broad_genes	G4N092	G4N092_MAGO7	unreviewed	Uncharacterized protein	MGG_09148	Magnaporthe oryzae (strain 70-15 / ATCC MYA-4617 / FGSC 8958) (Rice blast fungus) (Pyricularia oryzae)	340	carbohydrate metabolic process [GO:0005975]		hydrolase activity, hydrolyzing O-glycosyl compounds [GO:0004553]; carbohydrate metabolic process [GO:0005975]	hydrolase activity, hydrolyzing O-glycosyl compounds [GO:0004553]	GO:0004553; GO:0005975
				3	298141	300854	MGG_13350		protein_coding	Putative uncharacterized protein [Source:UniProtKB/TrEMBL%3BAcc:G4N093]	broad_genes	G4N093	G4N093_MAGO7	unreviewed	Zn(2)-C6 fungal-type domain-containing protein	MGG_13350	Magnaporthe oryzae (strain 70-15 / ATCC MYA-4617 / FGSC 8958) (Rice blast fungus) (Pyricularia oryzae)	471		nucleus [GO:0005634]	nucleus [GO:0005634]; DNA-binding transcription factor activity, RNA polymerase II-specific [GO:0000981]; zinc ion binding [GO:0008270]	DNA-binding transcription factor activity, RNA polymerase II-specific [GO:0000981]; zinc ion binding [GO:0008270]	GO:0000981; GO:0005634; GO:0008270	PHI:5654	Zn2Cys6 transcription factor	0	unaffected pathogenicity
				3	304000	307126	MGG_09149		protein_coding	Putative uncharacterized protein [Source:UniProtKB/TrEMBL%3BAcc:G4N094]	broad_genes	G4N094	G4N094_MAGO7	unreviewed	Uncharacterized protein	MGG_09149	Magnaporthe oryzae (strain 70-15 / ATCC MYA-4617 / FGSC 8958) (Rice blast fungus) (Pyricularia oryzae)	974
10	IRBlsh-S_4_586828	4	586828	4	536751	537119	MGG_17033		protein_coding	Putative uncharacterized protein [Source:UniProtKB/TrEMBL%3BAcc:G4N5U2]	broad_genes	G4N5U2	G4N5U2_MAGO7	unreviewed	Uncharacterized protein	MGG_17033	Magnaporthe oryzae (strain 70-15 / ATCC MYA-4617 / FGSC 8958) (Rice blast fungus) (Pyricularia oryzae)	97
				4	537409	537819	MGG_08532		protein_coding	Putative uncharacterized protein [Source:UniProtKB/TrEMBL%3BAcc:G4N5U3]	broad_genes	G4N5U3	G4N5U3_MAGO7	unreviewed	Uncharacterized protein	MGG_08532	Magnaporthe oryzae (strain 70-15 / ATCC MYA-4617 / FGSC 8958) (Rice blast fungus) (Pyricularia oryzae)	134
				4	538838	539397	MGG_15360		protein_coding	Putative uncharacterized protein [Source:UniProtKB/TrEMBL%3BAcc:G4N5U4]	broad_genes	G4N5U4	G4N5U4_MAGO7	unreviewed	Uncharacterized protein	MGG_15360	Magnaporthe oryzae (strain 70-15 / ATCC MYA-4617 / FGSC 8958) (Rice blast fungus) (Pyricularia oryzae)	68
				4	539975	540130	MGG_17034		protein_coding	Putative uncharacterized protein [Source:UniProtKB/TrEMBL%3BAcc:G4N5U5]	broad_genes	G4N5U5	G4N5U5_MAGO7	unreviewed	Uncharacterized protein	MGG_17034	Magnaporthe oryzae (strain 70-15 / ATCC MYA-4617 / FGSC 8958) (Rice blast fungus) (Pyricularia oryzae)	51
				4	541967	545506	MGG_08533		protein_coding	Putative uncharacterized protein [Source:UniProtKB/TrEMBL%3BAcc:G4N5U6]	broad_genes	G4N5U6	G4N5U6_MAGO7	unreviewed	Ankyrin_rpt-contain_dom domain-containing protein	MGG_08533	Magnaporthe oryzae (strain 70-15 / ATCC MYA-4617 / FGSC 8958) (Rice blast fungus) (Pyricularia oryzae)	1179
				4	545893	546465	MGG_13985		protein_coding	Putative uncharacterized protein [Source:UniProtKB/TrEMBL%3BAcc:G4N5U7]	broad_genes	G4N5U7	G4N5U7_MAGO7	unreviewed	CENP-V/GFA domain-containing protein	MGG_13985	Magnaporthe oryzae (strain 70-15 / ATCC MYA-4617 / FGSC 8958) (Rice blast fungus) (Pyricularia oryzae)	149			carbon-sulfur lyase activity [GO:0016846]; metal ion binding [GO:0046872]	carbon-sulfur lyase activity [GO:0016846]; metal ion binding [GO:0046872]	GO:0016846; GO:0046872
				4	546709	548885	MGG_13986		protein_coding	Delta(14)-sterol reductase [Source:UniProtKB/TrEMBL%3BAcc:G4N5U8]	broad_genes	G4N5U8	G4N5U8_MAGO7	unreviewed	Delta(14)-sterol reductase	MGG_13986	Magnaporthe oryzae (strain 70-15 / ATCC MYA-4617 / FGSC 8958) (Rice blast fungus) (Pyricularia oryzae)	480	sterol biosynthetic process [GO:0016126]	integral component of membrane [GO:0016021]	integral component of membrane [GO:0016021]; oxidoreductase activity, acting on the CH-CH group of donors, NAD or NADP as acceptor [GO:0016628]; sterol biosynthetic process [GO:0016126]	oxidoreductase activity, acting on the CH-CH group of donors, NAD or NADP as acceptor [GO:0016628]	GO:0016021; GO:0016126; GO:0016628
				4	549720	551007	MGG_08535		protein_coding	Putative uncharacterized protein [Source:UniProtKB/TrEMBL%3BAcc:G4N5U9]	broad_genes	G4N5U9	G4N5U9_MAGO7	unreviewed	MARVEL domain-containing protein	MGG_08535	Magnaporthe oryzae (strain 70-15 / ATCC MYA-4617 / FGSC 8958) (Rice blast fungus) (Pyricularia oryzae)	170		integral component of membrane [GO:0016021]	integral component of membrane [GO:0016021]		GO:0016021
				4	554732	559883	MGG_08536		protein_coding	Putative uncharacterized protein [Source:UniProtKB/TrEMBL%3BAcc:G4N5V0]	broad_genes	G4N5V0	G4N5V0_MAGO7	unreviewed	Zn(2)-C6 fungal-type domain-containing protein	MGG_08536	Magnaporthe oryzae (strain 70-15 / ATCC MYA-4617 / FGSC 8958) (Rice blast fungus) (Pyricularia oryzae)	747		nucleus [GO:0005634]	nucleus [GO:0005634]; DNA-binding transcription factor activity, RNA polymerase II-specific [GO:0000981]; zinc ion binding [GO:0008270]	DNA-binding transcription factor activity, RNA polymerase II-specific [GO:0000981]; zinc ion binding [GO:0008270]	GO:0000981; GO:0005634; GO:0008270
				4	562162	563603	MGG_08537		protein_coding	Endoglucanase-1%3B Endoglucanase-1%2C variant [Source:UniProtKB/TrEMBL%3BAcc:G4N5V2]	broad_genes	G4N5V2	CE12B_MAGO7	reviewed	Endoglucanase cel12B (EC 3.2.1.4) (Cellulase cel12B) (Endo-1,4-beta-glucanase cel12B)	cel12B MGG_08537	Magnaporthe oryzae (strain 70-15 / ATCC MYA-4617 / FGSC 8958) (Rice blast fungus) (Pyricularia oryzae)	264	cellulose catabolic process [GO:0030245]	extracellular region [GO:0005576]	extracellular region [GO:0005576]; cellulase activity [GO:0008810]; cellulose catabolic process [GO:0030245]	cellulase activity [GO:0008810]	GO:0005576; GO:0008810; GO:0030245
				4	566543	567508	MGG_15359		protein_coding	Putative uncharacterized protein [Source:UniProtKB/TrEMBL%3BAcc:G4N5V3]	broad_genes	G4N5V3	G4N5V3_MAGO7	unreviewed	Uncharacterized protein	MGG_15359	Magnaporthe oryzae (strain 70-15 / ATCC MYA-4617 / FGSC 8958) (Rice blast fungus) (Pyricularia oryzae)	281
				4	568130	568224	EFMOG00000000179	tRNA-Ala	tRNA_pseudogene	tRNA-Ala for anticodon CGC [Source:TRNASCAN_SE%3BAcc:tRNA-Ala]	ncrna_eg	tRNA-Ala
				4	568130	568224	ENSRNA049561092	tRNA-Ala	tRNA	tRNA-Ala for anticodon CGC	trnascan_gene
				4	571498	572710	MGG_08539		protein_coding	Putative uncharacterized protein [Source:UniProtKB/TrEMBL%3BAcc:G4N5V4]	broad_genes	G4N5V4	G4N5V4_MAGO7	unreviewed	SRR1 domain-containing protein	MGG_08539	Magnaporthe oryzae (strain 70-15 / ATCC MYA-4617 / FGSC 8958) (Rice blast fungus) (Pyricularia oryzae)	374
				4	573240	575255	MGG_08540		protein_coding	Pyoverdine/dityrosine biosynthesis family protein [Source:UniProtKB/TrEMBL%3BAcc:G4N5V5]	broad_genes	G4N5V5	G4N5V5_MAGO7	unreviewed	Pyoverdine/dityrosine biosynthesis family protein	MGG_08540	Magnaporthe oryzae (strain 70-15 / ATCC MYA-4617 / FGSC 8958) (Rice blast fungus) (Pyricularia oryzae)	671			oxidoreductase activity [GO:0016491]	oxidoreductase activity [GO:0016491]	GO:0016491
				4	576176	576247	EFMOG00000000240	tRNA-Pseudo	tRNA_pseudogene	tRNA-Pseudo for anticodon GUU [Source:TRNASCAN_SE%3BAcc:tRNA-Pseudo]	ncrna_eg	tRNA-Pseudo
				4	577086	578950	MGG_08541		protein_coding	FAD monooxygenase [Source:UniProtKB/TrEMBL%3BAcc:G4N5V6]	broad_genes	G4N5V6	G4N5V6_MAGO7	unreviewed	FAD monooxygenase	MGG_08541	Magnaporthe oryzae (strain 70-15 / ATCC MYA-4617 / FGSC 8958) (Rice blast fungus) (Pyricularia oryzae)	517			FAD binding [GO:0071949]; monooxygenase activity [GO:0004497]	FAD binding [GO:0071949]; monooxygenase activity [GO:0004497]	GO:0004497; GO:0071949
				4	579118	582900	MGG_08542		protein_coding	Putative uncharacterized protein [Source:UniProtKB/TrEMBL%3BAcc:G4N5V7]	broad_genes	G4N5V7	G4N5V7_MAGO7	unreviewed	NACHT domain-containing protein	MGG_08542	Magnaporthe oryzae (strain 70-15 / ATCC MYA-4617 / FGSC 8958) (Rice blast fungus) (Pyricularia oryzae)	1186
				4	583447	584667	MGG_08543		protein_coding	Putative uncharacterized protein [Source:UniProtKB/TrEMBL%3BAcc:G4N5V8]	broad_genes	G4N5V8	G4N5V8_MAGO7	unreviewed	Uncharacterized protein	MGG_08543	Magnaporthe oryzae (strain 70-15 / ATCC MYA-4617 / FGSC 8958) (Rice blast fungus) (Pyricularia oryzae)	106
				4	588558	593523	MGG_17035		protein_coding	Putative uncharacterized protein [Source:UniProtKB/TrEMBL%3BAcc:G4N5V9]	broad_genes	G4N5V9	G4N5V9_MAGO7	unreviewed	Uncharacterized protein	MGG_17035	Magnaporthe oryzae (strain 70-15 / ATCC MYA-4617 / FGSC 8958) (Rice blast fungus) (Pyricularia oryzae)	273
				4	593840	594450	MGG_08546		protein_coding	Putative uncharacterized protein [Source:UniProtKB/TrEMBL%3BAcc:G4N5W3]	broad_genes	G4N5W3	G4N5W3_MAGO7	unreviewed	Uncharacterized protein	MGG_08546	Magnaporthe oryzae (strain 70-15 / ATCC MYA-4617 / FGSC 8958) (Rice blast fungus) (Pyricularia oryzae)	130
				4	595923	601005	MGG_08547		protein_coding	CAMK/CAMK1 protein kinase [Source:UniProtKB/TrEMBL%3BAcc:G4N5W4]	broad_genes	G4N5W4	G4N5W4_MAGO7	unreviewed	CAMK/CAMK1 protein kinase	MGG_08547	Magnaporthe oryzae (strain 70-15 / ATCC MYA-4617 / FGSC 8958) (Rice blast fungus) (Pyricularia oryzae)	641			ATP binding [GO:0005524]; protein kinase activity [GO:0004672]	ATP binding [GO:0005524]; protein kinase activity [GO:0004672]	GO:0004672; GO:0005524
				4	601716	602004	MGG_17036		protein_coding	Putative uncharacterized protein [Source:UniProtKB/TrEMBL%3BAcc:G4N5W5]	broad_genes	G4N5W5	G4N5W5_MAGO7	unreviewed	Uncharacterized protein	MGG_17036	Magnaporthe oryzae (strain 70-15 / ATCC MYA-4617 / FGSC 8958) (Rice blast fungus) (Pyricularia oryzae)	76
				4	603516	605279	MGG_08548		protein_coding	Proline-specific permease [Source:UniProtKB/TrEMBL%3BAcc:G4N5W6]	broad_genes	G4N5W6	G4N5W6_MAGO7	unreviewed	Proline-specific permease	MGG_08548	Magnaporthe oryzae (strain 70-15 / ATCC MYA-4617 / FGSC 8958) (Rice blast fungus) (Pyricularia oryzae)	587	amino acid transport [GO:0006865]; transmembrane transport [GO:0055085]	integral component of membrane [GO:0016021]	integral component of membrane [GO:0016021]; amino acid transport [GO:0006865]; transmembrane transport [GO:0055085]		GO:0006865; GO:0016021; GO:0055085
				4	605786	608017	MGG_08549		protein_coding	CAMK protein kinase [Source:UniProtKB/TrEMBL%3BAcc:G4N5W7]	broad_genes	G4N5W7	G4N5W7_MAGO7	unreviewed	CAMK protein kinase (Fragment)	MGG_08549	Magnaporthe oryzae (strain 70-15 / ATCC MYA-4617 / FGSC 8958) (Rice blast fungus) (Pyricularia oryzae)	686			ATP binding [GO:0005524]; chaperone binding [GO:0051087]; protein kinase activity [GO:0004672]	ATP binding [GO:0005524]; chaperone binding [GO:0051087]; protein kinase activity [GO:0004672]	GO:0004672; GO:0005524; GO:0051087
				4	609563	611307	MGG_08550		protein_coding	Lipolytic enzyme [Source:UniProtKB/TrEMBL%3BAcc:G4N5W8]	broad_genes	G4N5W8	G4N5W8_MAGO7	unreviewed	Lipolytic enzyme	MGG_08550	Magnaporthe oryzae (strain 70-15 / ATCC MYA-4617 / FGSC 8958) (Rice blast fungus) (Pyricularia oryzae)	360			carboxylic ester hydrolase activity [GO:0052689]	carboxylic ester hydrolase activity [GO:0052689]	GO:0052689
				4	613133	614583	MGG_13993		protein_coding	Putative uncharacterized protein [Source:UniProtKB/TrEMBL%3BAcc:G4N5W9]	broad_genes	G4N5W9	G4N5W9_MAGO7	unreviewed	GH131_N domain-containing protein	MGG_13993	Magnaporthe oryzae (strain 70-15 / ATCC MYA-4617 / FGSC 8958) (Rice blast fungus) (Pyricularia oryzae)	302
				4	621904	625480	MGG_08551		protein_coding	Putative uncharacterized protein [Source:UniProtKB/TrEMBL%3BAcc:G4N5X0]	broad_genes	G4N5X0	G4N5X0_MAGO7	unreviewed	Fucose-specific lectin	MGG_08551	Magnaporthe oryzae (strain 70-15 / ATCC MYA-4617 / FGSC 8958) (Rice blast fungus) (Pyricularia oryzae)	583		integral component of membrane [GO:0016021]	integral component of membrane [GO:0016021]		GO:0016021
				4	624925	628120	MGG_13994		protein_coding	Putative uncharacterized protein [Source:UniProtKB/TrEMBL%3BAcc:G4N5X1]	broad_genes	G4N5X1	G4N5X1_MAGO7	unreviewed	Zn(2)-C6 fungal-type domain-containing protein	MGG_13994	Magnaporthe oryzae (strain 70-15 / ATCC MYA-4617 / FGSC 8958) (Rice blast fungus) (Pyricularia oryzae)	798	transcription, DNA-templated [GO:0006351]	nucleus [GO:0005634]	nucleus [GO:0005634]; DNA binding [GO:0003677]; DNA-binding transcription factor activity, RNA polymerase II-specific [GO:0000981]; zinc ion binding [GO:0008270]; transcription, DNA-templated [GO:0006351]	DNA binding [GO:0003677]; DNA-binding transcription factor activity, RNA polymerase II-specific [GO:0000981]; zinc ion binding [GO:0008270]	GO:0000981; GO:0003677; GO:0005634; GO:0006351; GO:0008270
				4	628650	629544	MGG_08552		protein_coding	Putative uncharacterized protein [Source:UniProtKB/TrEMBL%3BAcc:G4N5X2]	broad_genes	G4N5X2	G4N5X2_MAGO7	unreviewed	Uncharacterized protein	MGG_08552	Magnaporthe oryzae (strain 70-15 / ATCC MYA-4617 / FGSC 8958) (Rice blast fungus) (Pyricularia oryzae)	116
				4	630792	631130	MGG_17037		protein_coding	Putative uncharacterized protein [Source:UniProtKB/TrEMBL%3BAcc:G4N5X3]	broad_genes	G4N5X3	G4N5X3_MAGO7	unreviewed	Uncharacterized protein	MGG_17037	Magnaporthe oryzae (strain 70-15 / ATCC MYA-4617 / FGSC 8958) (Rice blast fungus) (Pyricularia oryzae)	75
				4	634885	635131	MGG_13996		protein_coding	Putative uncharacterized protein [Source:UniProtKB/TrEMBL%3BAcc:G4N5X4]	broad_genes	G4N5X4	G4N5X4_MAGO7	unreviewed	Uncharacterized protein	MGG_13996	Magnaporthe oryzae (strain 70-15 / ATCC MYA-4617 / FGSC 8958) (Rice blast fungus) (Pyricularia oryzae)	64
				4	636217	637052	MGG_17038		protein_coding	Putative uncharacterized protein [Source:UniProtKB/TrEMBL%3BAcc:G4N5X5]	broad_genes	G4N5X5	G4N5X5_MAGO7	unreviewed	Uncharacterized protein	MGG_17038	Magnaporthe oryzae (strain 70-15 / ATCC MYA-4617 / FGSC 8958) (Rice blast fungus) (Pyricularia oryzae)	217
11	IRBlsh-S_5_4455619	5	4455619	5	4400230	4412433	MGG_00022		protein_coding	Bassianolide synthetase [Source:UniProtKB/TrEMBL%3BAcc:G4NF21]	broad_genes	G4NF21	G4NF21_MAGO7	unreviewed	Bassianolide synthetase	MGG_00022	Magnaporthe oryzae (strain 70-15 / ATCC MYA-4617 / FGSC 8958) (Rice blast fungus) (Pyricularia oryzae)	4067			ligase activity [GO:0016874]; phosphopantetheine binding [GO:0031177]	ligase activity [GO:0016874]; phosphopantetheine binding [GO:0031177]	GO:0016874; GO:0031177
				5	4412695	4414108	MGG_00021		protein_coding	Putative uncharacterized protein [Source:UniProtKB/TrEMBL%3BAcc:G4NF22]	broad_genes	G4NF22	G4NF22_MAGO7	unreviewed	Uncharacterized protein	MGG_00021	Magnaporthe oryzae (strain 70-15 / ATCC MYA-4617 / FGSC 8958) (Rice blast fungus) (Pyricularia oryzae)	434		nucleus [GO:0005634]	nucleus [GO:0005634]; DNA-binding transcription factor activity, RNA polymerase II-specific [GO:0000981]; zinc ion binding [GO:0008270]	DNA-binding transcription factor activity, RNA polymerase II-specific [GO:0000981]; zinc ion binding [GO:0008270]	GO:0000981; GO:0005634; GO:0008270	PHI:5662	Zn2Cys6 transcription factor	0	unaffected pathogenicity
				5	4415242	4417054	MGG_00020		protein_coding	Putative uncharacterized protein [Source:UniProtKB/TrEMBL%3BAcc:G4NF23]	broad_genes	G4NF23	G4NF23_MAGO7	unreviewed	Uncharacterized protein	MGG_00020	Magnaporthe oryzae (strain 70-15 / ATCC MYA-4617 / FGSC 8958) (Rice blast fungus) (Pyricularia oryzae)	507
				5	4418626	4419119	MGG_00019		protein_coding	Putative uncharacterized protein [Source:UniProtKB/TrEMBL%3BAcc:G4NF24]	broad_genes	G4NF24	G4NF24_MAGO7	unreviewed	Uncharacterized protein	MGG_00019	Magnaporthe oryzae (strain 70-15 / ATCC MYA-4617 / FGSC 8958) (Rice blast fungus) (Pyricularia oryzae)	130
				5	4420313	4422816	MGG_00018		protein_coding	Integral membrane protein [Source:UniProtKB/TrEMBL%3BAcc:G4NF25]	broad_genes	G4NF25	G4NF25_MAGO7	unreviewed	Integral membrane protein	MGG_00018	Magnaporthe oryzae (strain 70-15 / ATCC MYA-4617 / FGSC 8958) (Rice blast fungus) (Pyricularia oryzae)	596		integral component of membrane [GO:0016021]	integral component of membrane [GO:0016021]; transmembrane transporter activity [GO:0022857]	transmembrane transporter activity [GO:0022857]	GO:0016021; GO:0022857
				5	4422734	4426205	MGG_00017		protein_coding	L-aminoadipate-semialdehyde dehydrogenase [Source:UniProtKB/TrEMBL%3BAcc:G4NF26]	broad_genes	G4NF26	G4NF26_MAGO7	unreviewed	L-aminoadipate-semialdehyde dehydrogenase	MGG_00017	Magnaporthe oryzae (strain 70-15 / ATCC MYA-4617 / FGSC 8958) (Rice blast fungus) (Pyricularia oryzae)	1079
				5	4426467	4428237	MGG_11697		protein_coding	Carbamoylphosphate synthase large subunit [Source:UniProtKB/TrEMBL%3BAcc:G4NF27]	broad_genes	G4NF27	G4NF27_MAGO7	unreviewed	Carbamoylphosphate synthase large subunit	MGG_11697	Magnaporthe oryzae (strain 70-15 / ATCC MYA-4617 / FGSC 8958) (Rice blast fungus) (Pyricularia oryzae)	553		integral component of membrane [GO:0016021]	integral component of membrane [GO:0016021]; ATP binding [GO:0005524]; metal ion binding [GO:0046872]	ATP binding [GO:0005524]; metal ion binding [GO:0046872]	GO:0005524; GO:0016021; GO:0046872
				5	4429065	4430803	MGG_00016		protein_coding	2-epi-5-epi-valiolone synthase [Source:UniProtKB/TrEMBL%3BAcc:G4NF28]	broad_genes	G4NF28	G4NF28_MAGO7	unreviewed	2-epi-5-epi-valiolone synthase	MGG_00016	Magnaporthe oryzae (strain 70-15 / ATCC MYA-4617 / FGSC 8958) (Rice blast fungus) (Pyricularia oryzae)	486	antibiotic biosynthetic process [GO:0017000]		lyase activity [GO:0016829]; antibiotic biosynthetic process [GO:0017000]	lyase activity [GO:0016829]	GO:0016829; GO:0017000
				5	4431948	4433049	MGG_00015		protein_coding	Catechol O-methyltransferase [Source:UniProtKB/TrEMBL%3BAcc:G4NF29]	broad_genes	G4NF29	G4NF29_MAGO7	unreviewed	Catechol O-methyltransferase	MGG_00015	Magnaporthe oryzae (strain 70-15 / ATCC MYA-4617 / FGSC 8958) (Rice blast fungus) (Pyricularia oryzae)	266	methylation [GO:0032259]		O-methyltransferase activity [GO:0008171]; methylation [GO:0032259]	O-methyltransferase activity [GO:0008171]	GO:0008171; GO:0032259
				5	4438518	4439948	MGG_14724		protein_coding	Putative uncharacterized protein [Source:UniProtKB/TrEMBL%3BAcc:G4NEV3]	broad_genes	G4NEV3	G4NEV3_MAGO7	unreviewed	Uncharacterized protein	MGG_00035 MGG_14724	Magnaporthe oryzae (strain 70-15 / ATCC MYA-4617 / FGSC 8958) (Rice blast fungus) (Pyricularia oryzae)	476
				5	4444362	4445167	MGG_00013		protein_coding	Putative uncharacterized protein [Source:UniProtKB/TrEMBL%3BAcc:G4NF31]	broad_genes	G4NF31	G4NF31_MAGO7	unreviewed	Uncharacterized protein	MGG_00013	Magnaporthe oryzae (strain 70-15 / ATCC MYA-4617 / FGSC 8958) (Rice blast fungus) (Pyricularia oryzae)	175
				5	4445632	4446261	MGG_17551		protein_coding	Putative uncharacterized protein [Source:UniProtKB/TrEMBL%3BAcc:G4NF32]	broad_genes	G4NF32	G4NF32_MAGO7	unreviewed	Uncharacterized protein	MGG_17551	Magnaporthe oryzae (strain 70-15 / ATCC MYA-4617 / FGSC 8958) (Rice blast fungus) (Pyricularia oryzae)	161
				5	4453288	4455595	MGG_00010		protein_coding	Putative uncharacterized protein [Source:UniProtKB/TrEMBL%3BAcc:G4NF33]	broad_genes	G4NF33	G4NF33_MAGO7	unreviewed	Uncharacterized protein	MGG_00010	Magnaporthe oryzae (strain 70-15 / ATCC MYA-4617 / FGSC 8958) (Rice blast fungus) (Pyricularia oryzae)	555		integral component of membrane [GO:0016021]	integral component of membrane [GO:0016021]; transmembrane transporter activity [GO:0022857]	transmembrane transporter activity [GO:0022857]	GO:0016021; GO:0022857
				5	4456462	4456893	MGG_17552		pseudogene		broad_genes
				5	4459061	4460892	MGG_17553		protein_coding	Putative uncharacterized protein [Source:UniProtKB/TrEMBL%3BAcc:G4NF35]	broad_genes	G4NF35	G4NF35_MAGO7	unreviewed	CCHC-type domain-containing protein	MGG_17553	Magnaporthe oryzae (strain 70-15 / ATCC MYA-4617 / FGSC 8958) (Rice blast fungus) (Pyricularia oryzae)	560			nucleic acid binding [GO:0003676]; zinc ion binding [GO:0008270]	nucleic acid binding [GO:0003676]; zinc ion binding [GO:0008270]	GO:0003676; GO:0008270
				5	4464494	4465195	MGG_17554		protein_coding	Putative uncharacterized protein [Source:UniProtKB/TrEMBL%3BAcc:G4NF36]	broad_genes	G4NF36	G4NF36_MAGO7	unreviewed	Uncharacterized protein	MGG_17554	Magnaporthe oryzae (strain 70-15 / ATCC MYA-4617 / FGSC 8958) (Rice blast fungus) (Pyricularia oryzae)	191
				5	4469273	4470286	MGG_00005		protein_coding	Putative uncharacterized protein [Source:UniProtKB/TrEMBL%3BAcc:G4NF37]	broad_genes	G4NF37	G4NF37_MAGO7	unreviewed	Uncharacterized protein	MGG_00005 MGG_15483	Magnaporthe oryzae (strain 70-15 / ATCC MYA-4617 / FGSC 8958) (Rice blast fungus) (Pyricularia oryzae)	160
				5	4471747	4472229	MGG_17555		protein_coding	Putative uncharacterized protein [Source:UniProtKB/TrEMBL%3BAcc:G4MXX7]	broad_genes	G4MXX7	G4MXX7_MAGO7	unreviewed	Uncharacterized protein	MGG_15981 MGG_17555	Magnaporthe oryzae (strain 70-15 / ATCC MYA-4617 / FGSC 8958) (Rice blast fungus) (Pyricularia oryzae)	119
				5	4481942	4482343	MGG_14725		protein_coding	Putative uncharacterized protein [Source:UniProtKB/TrEMBL%3BAcc:G4MXV9]	broad_genes	G4MXV9	G4MXV9_MAGO7	unreviewed	Uncharacterized protein	MGG_08230 MGG_14725	Magnaporthe oryzae (strain 70-15 / ATCC MYA-4617 / FGSC 8958) (Rice blast fungus) (Pyricularia oryzae)	133
				5	4483392	4485833	MGG_14726		protein_coding	Alpha-L-arabinofuranosidase [Source:UniProtKB/TrEMBL%3BAcc:G4NF40]	broad_genes	G4NF40	G4NF40_MAGO7	unreviewed	Non-reducing end alpha-L-arabinofuranosidase (EC 3.2.1.55)	MGG_14726	Magnaporthe oryzae (strain 70-15 / ATCC MYA-4617 / FGSC 8958) (Rice blast fungus) (Pyricularia oryzae)	459	L-arabinose metabolic process [GO:0046373]; xylan catabolic process [GO:0045493]	extracellular region [GO:0005576]	extracellular region [GO:0005576]; alpha-L-arabinofuranosidase activity [GO:0046556]; cellulose binding [GO:0030248]; L-arabinose metabolic process [GO:0046373]; xylan catabolic process [GO:0045493]	alpha-L-arabinofuranosidase activity [GO:0046556]; cellulose binding [GO:0030248]	GO:0005576; GO:0030248; GO:0045493; GO:0046373; GO:0046556
				5	4486388	4487569	MGG_14727		protein_coding	Putative uncharacterized protein [Source:UniProtKB/TrEMBL%3BAcc:G4NF41]	broad_genes	G4NF41	G4NF41_MAGO7	unreviewed	Uncharacterized protein	MGG_08232 MGG_14727	Magnaporthe oryzae (strain 70-15 / ATCC MYA-4617 / FGSC 8958) (Rice blast fungus) (Pyricularia oryzae)	393		integral component of membrane [GO:0016021]	integral component of membrane [GO:0016021]		GO:0016021
12	IRBlsh-S_7_2400656	7	2400656	7	2350099	2350697	MGG_18028		protein_coding	Putative uncharacterized protein [Source:UniProtKB/TrEMBL%3BAcc:G4NJW0]	broad_genes	G4NJW0	G4NJW0_MAGO7	unreviewed	Uncharacterized protein	MGG_18028	Magnaporthe oryzae (strain 70-15 / ATCC MYA-4617 / FGSC 8958) (Rice blast fungus) (Pyricularia oryzae)	194
				7	2351199	2352836	MGG_02570		protein_coding	Dienelactone hydrolase [Source:UniProtKB/TrEMBL%3BAcc:G4NJW1]	broad_genes	G4NJW1	G4NJW1_MAGO7	unreviewed	Dienelactone hydrolase	MGG_02570	Magnaporthe oryzae (strain 70-15 / ATCC MYA-4617 / FGSC 8958) (Rice blast fungus) (Pyricularia oryzae)	338			hydrolase activity [GO:0016787]	hydrolase activity [GO:0016787]	GO:0016787
				7	2353063	2358537	MGG_02569		protein_coding	Putative uncharacterized protein [Source:UniProtKB/TrEMBL%3BAcc:G5EHW5]	broad_genes	G5EHW5	G5EHW5_MAGO7	unreviewed	Uncharacterized protein	MGCH7_ch7g282 MGG_02569	Magnaporthe oryzae (strain 70-15 / ATCC MYA-4617 / FGSC 8958) (Rice blast fungus) (Pyricularia oryzae)	1671
				7	2358944	2359727	MGG_02568		protein_coding	Ubiquitin-conjugating enzyme E2 35 [Source:UniProtKB/TrEMBL%3BAcc:G4NJW3]	broad_genes	G4NJW3	G4NJW3_MAGO7	unreviewed	Ubiquitin-conjugating enzyme E2 35	MGG_02568	Magnaporthe oryzae (strain 70-15 / ATCC MYA-4617 / FGSC 8958) (Rice blast fungus) (Pyricularia oryzae)	150			ATP binding [GO:0005524]; transferase activity [GO:0016740]	ATP binding [GO:0005524]; transferase activity [GO:0016740]	GO:0005524; GO:0016740
				7	2361862	2364157	MGG_02567		protein_coding	Putative uncharacterized protein [Source:UniProtKB/TrEMBL%3BAcc:G5EHX6]	broad_genes	G5EHX6	G5EHX6_MAGO7	unreviewed	Uncharacterized protein	MGCH7_ch7g280 MGG_02567	Magnaporthe oryzae (strain 70-15 / ATCC MYA-4617 / FGSC 8958) (Rice blast fungus) (Pyricularia oryzae)	224
				7	2364688	2366635	MGG_02566		protein_coding	Trans-2-enoyl-CoA reductase [Source:UniProtKB/TrEMBL%3BAcc:G5EHT4]	broad_genes	G5EHT4	G5EHT4_MAGO7	unreviewed	Trans-2-enoyl-CoA reductase	MGCH7_ch7g279 MGG_02566	Magnaporthe oryzae (strain 70-15 / ATCC MYA-4617 / FGSC 8958) (Rice blast fungus) (Pyricularia oryzae)	428			oxidoreductase activity [GO:0016491]	oxidoreductase activity [GO:0016491]	GO:0016491
				7	2366665	2368305	MGG_02565		protein_coding	Putative uncharacterized protein [Source:UniProtKB/TrEMBL%3BAcc:G5EHT0]	broad_genes	G5EHT0	G5EHT0_MAGO7	unreviewed	Uncharacterized protein	MGCH7_ch7g278 MGG_02565	Magnaporthe oryzae (strain 70-15 / ATCC MYA-4617 / FGSC 8958) (Rice blast fungus) (Pyricularia oryzae)	546
				7	2369751	2370659	MGG_02564		protein_coding	Putative uncharacterized protein [Source:UniProtKB/TrEMBL%3BAcc:G5EI28]	broad_genes	G5EI28	G5EI28_MAGO7	unreviewed	Uncharacterized protein	MGCH7_ch7g277 MGG_02564	Magnaporthe oryzae (strain 70-15 / ATCC MYA-4617 / FGSC 8958) (Rice blast fungus) (Pyricularia oryzae)	302
				7	2371189	2372173	MGG_18029		protein_coding	Putative uncharacterized protein [Source:UniProtKB/TrEMBL%3BAcc:G5EH49]	broad_genes	G5EH49	G5EH49_MAGO7	unreviewed	Uncharacterized protein	MGCH7_ch7g276 MGG_18029	Magnaporthe oryzae (strain 70-15 / ATCC MYA-4617 / FGSC 8958) (Rice blast fungus) (Pyricularia oryzae)	109
				7	2373169	2374580	MGG_02562		protein_coding	Initiation-specific alpha-1%2C6-mannosyltransferase [Source:UniProtKB/TrEMBL%3BAcc:G5EGZ0]	broad_genes	G5EGZ0	G5EGZ0_MAGO7	unreviewed	Initiation-specific alpha-1,6-mannosyltransferase	MGCH7_ch7g275 MGG_02562	Magnaporthe oryzae (strain 70-15 / ATCC MYA-4617 / FGSC 8958) (Rice blast fungus) (Pyricularia oryzae)	333			alpha-1,6-mannosyltransferase activity [GO:0000009]	alpha-1,6-mannosyltransferase activity [GO:0000009]	GO:0000009
				7	2375209	2375899	MGG_18030		protein_coding	Putative uncharacterized protein [Source:UniProtKB/TrEMBL%3BAcc:G4NJX0]	broad_genes	G4NJX0	G4NJX0_MAGO7	unreviewed	Uncharacterized protein	MGG_18030	Magnaporthe oryzae (strain 70-15 / ATCC MYA-4617 / FGSC 8958) (Rice blast fungus) (Pyricularia oryzae)	118
				7	2375386	2375457	EFMOG00000000252	tRNA-Pseudo	tRNA_pseudogene	tRNA-Pseudo for anticodon GUU [Source:TRNASCAN_SE%3BAcc:tRNA-Pseudo]	ncrna_eg	tRNA-Pseudo
				7	2375858	2376168	MGG_02561		protein_coding	Putative uncharacterized protein [Source:UniProtKB/TrEMBL%3BAcc:G4NJX1]	broad_genes	G4NJX1	G4NJX1_MAGO7	unreviewed	Uncharacterized protein	MGG_02561	Magnaporthe oryzae (strain 70-15 / ATCC MYA-4617 / FGSC 8958) (Rice blast fungus) (Pyricularia oryzae)	74
				7	2378914	2379591	MGG_02560		protein_coding	Putative uncharacterized protein [Source:UniProtKB/TrEMBL%3BAcc:G4NJX2]	broad_genes	G4NJX2	G4NJX2_MAGO7	unreviewed	Uncharacterized protein	MGG_02560	Magnaporthe oryzae (strain 70-15 / ATCC MYA-4617 / FGSC 8958) (Rice blast fungus) (Pyricularia oryzae)	160
				7	2379832	2381336	MGG_02559		protein_coding	MOSC domain-containing protein [Source:UniProtKB/TrEMBL%3BAcc:G5EH16]	broad_genes	G5EH16	G5EH16_MAGO7	unreviewed	MOSC domain-containing protein	MGCH7_ch7g272 MGG_02559	Magnaporthe oryzae (strain 70-15 / ATCC MYA-4617 / FGSC 8958) (Rice blast fungus) (Pyricularia oryzae)	397			catalytic activity [GO:0003824]; molybdenum ion binding [GO:0030151]; pyridoxal phosphate binding [GO:0030170]	catalytic activity [GO:0003824]; molybdenum ion binding [GO:0030151]; pyridoxal phosphate binding [GO:0030170]	GO:0003824; GO:0030151; GO:0030170
				7	2382678	2384103	MGG_12664		protein_coding	Putative uncharacterized protein [Source:UniProtKB/TrEMBL%3BAcc:G4NJX4]	broad_genes	G4NJX4	G4NJX4_MAGO7	unreviewed	DLH domain-containing protein	MGG_12664	Magnaporthe oryzae (strain 70-15 / ATCC MYA-4617 / FGSC 8958) (Rice blast fungus) (Pyricularia oryzae)	258			hydrolase activity [GO:0016787]	hydrolase activity [GO:0016787]	GO:0016787
				7	2384503	2384581	EFMOG00000000229	tRNA-Gln	tRNA_pseudogene	tRNA-Gln for anticodon CUG [Source:TRNASCAN_SE%3BAcc:tRNA-Gln]	ncrna_eg	tRNA-Gln
				7	2384503	2384581	ENSRNA049560484	tRNA-Gln	tRNA	tRNA-Gln for anticodon CUG	trnascan_gene
				7	2384769	2385474	MGG_18031		protein_coding	Putative uncharacterized protein [Source:UniProtKB/TrEMBL%3BAcc:G4NJX5]	broad_genes	G4NJX5	G4NJX5_MAGO7	unreviewed	Uncharacterized protein	MGG_18031	Magnaporthe oryzae (strain 70-15 / ATCC MYA-4617 / FGSC 8958) (Rice blast fungus) (Pyricularia oryzae)	151
				7	2387074	2388149	MGG_02557		protein_coding	Putative uncharacterized protein [Source:UniProtKB/TrEMBL%3BAcc:G4NJX6]	broad_genes	G4NJX6	G4NJX6_MAGO7	unreviewed	Uncharacterized protein	MGG_02557	Magnaporthe oryzae (strain 70-15 / ATCC MYA-4617 / FGSC 8958) (Rice blast fungus) (Pyricularia oryzae)	321
				7	2388447	2388989	MGG_02556		protein_coding	Putative uncharacterized protein [Source:UniProtKB/TrEMBL%3BAcc:G4NJX7]	broad_genes	G4NJX7	G4NJX7_MAGO7	unreviewed	Uncharacterized protein	MGG_02556	Magnaporthe oryzae (strain 70-15 / ATCC MYA-4617 / FGSC 8958) (Rice blast fungus) (Pyricularia oryzae)	139
				7	2394131	2394202	EFMOG00000000024	tRNA-Pseudo	tRNA_pseudogene	tRNA-Pseudo for anticodon GUU [Source:TRNASCAN_SE%3BAcc:tRNA-Pseudo]	ncrna_eg	tRNA-Pseudo
				7	2394388	2395048	MGG_15035		protein_coding	Putative uncharacterized protein [Source:UniProtKB/TrEMBL%3BAcc:G4NJX8]	broad_genes	G4NJX8	G4NJX8_MAGO7	unreviewed	Uncharacterized protein	MGG_15035	Magnaporthe oryzae (strain 70-15 / ATCC MYA-4617 / FGSC 8958) (Rice blast fungus) (Pyricularia oryzae)	195
				7	2396291	2397630	MGG_12668		protein_coding	Putative uncharacterized protein [Source:UniProtKB/TrEMBL%3BAcc:G4NJX9]	broad_genes	G4NJX9	G4NJX9_MAGO7	unreviewed	Uncharacterized protein	MGG_12668	Magnaporthe oryzae (strain 70-15 / ATCC MYA-4617 / FGSC 8958) (Rice blast fungus) (Pyricularia oryzae)	337
				7	2404160	2405547	MGG_02550		protein_coding	Putative uncharacterized protein [Source:UniProtKB/TrEMBL%3BAcc:G4NJY0]	broad_genes	G4NJY0	G4NJY0_MAGO7	unreviewed	Uncharacterized protein	MGG_02550	Magnaporthe oryzae (strain 70-15 / ATCC MYA-4617 / FGSC 8958) (Rice blast fungus) (Pyricularia oryzae)	430
				7	2406395	2407483	MGG_02549		protein_coding	Putative uncharacterized protein [Source:UniProtKB/TrEMBL%3BAcc:G5EH97]	broad_genes	G5EH97	G5EH97_MAGO7	unreviewed	AIG1-type G domain-containing protein	MGCH7_ch7g265 MGG_02549	Magnaporthe oryzae (strain 70-15 / ATCC MYA-4617 / FGSC 8958) (Rice blast fungus) (Pyricularia oryzae)	338			GTP binding [GO:0005525]	GTP binding [GO:0005525]	GO:0005525
				7	2408209	2410751	MGG_02548		protein_coding	Putative uncharacterized protein [Source:UniProtKB/TrEMBL%3BAcc:G4NJY2]	broad_genes	G4NJY2	G4NJY2_MAGO7	unreviewed	Uncharacterized protein	MGG_02548	Magnaporthe oryzae (strain 70-15 / ATCC MYA-4617 / FGSC 8958) (Rice blast fungus) (Pyricularia oryzae)	570			ATP binding [GO:0005524]	ATP binding [GO:0005524]	GO:0005524
				7	2413826	2414269	MGG_02546		protein_coding	Putative uncharacterized protein [Source:UniProtKB/TrEMBL%3BAcc:G5EHV4]	broad_genes	G5EHV4	G5EHV4_MAGO7	unreviewed	Uncharacterized protein	MGCH7_ch7g263 MGG_02546	Magnaporthe oryzae (strain 70-15 / ATCC MYA-4617 / FGSC 8958) (Rice blast fungus) (Pyricularia oryzae)	147
				7	2414852	2415915	MGG_02545		protein_coding	Putative uncharacterized protein [Source:UniProtKB/TrEMBL%3BAcc:G5EHB6]	broad_genes	G5EHB6	G5EHB6_MAGO7	unreviewed	EthD domain-containing protein	MGCH7_ch7g262 MGG_02545	Magnaporthe oryzae (strain 70-15 / ATCC MYA-4617 / FGSC 8958) (Rice blast fungus) (Pyricularia oryzae)	126			oxidoreductase activity [GO:0016491]	oxidoreductase activity [GO:0016491]	GO:0016491
				7	2416209	2417905	MGG_02544		protein_coding	D-arabinitol dehydrogenase [Source:UniProtKB/TrEMBL%3BAcc:G4NK29]	broad_genes	G4NK29	G4NK29_MAGO7	unreviewed	D-arabinitol dehydrogenase	MGG_02544	Magnaporthe oryzae (strain 70-15 / ATCC MYA-4617 / FGSC 8958) (Rice blast fungus) (Pyricularia oryzae)	363			oxidoreductase activity [GO:0016491]	oxidoreductase activity [GO:0016491]	GO:0016491
				7	2418800	2419850	MGG_02543		protein_coding	Putative uncharacterized protein [Source:UniProtKB/TrEMBL%3BAcc:G4NK30]	broad_genes	G4NK30	G4NK30_MAGO7	unreviewed	SGNH_hydro domain-containing protein	MGG_02543	Magnaporthe oryzae (strain 70-15 / ATCC MYA-4617 / FGSC 8958) (Rice blast fungus) (Pyricularia oryzae)	291
				7	2425160	2428033	MGG_02542		protein_coding	Putative uncharacterized protein [Source:UniProtKB/TrEMBL%3BAcc:G4NK31]	broad_genes	G4NK31	G4NK31_MAGO7	unreviewed	Uncharacterized protein	MGG_02542	Magnaporthe oryzae (strain 70-15 / ATCC MYA-4617 / FGSC 8958) (Rice blast fungus) (Pyricularia oryzae)	832
				7	2431515	2433908	MGG_02541		protein_coding	Methylcrotonoyl-CoA carboxylase subunit beta [Source:UniProtKB/TrEMBL%3BAcc:G5EH95]	broad_genes	G5EH95	G5EH95_MAGO7	unreviewed	Methylcrotonoyl-CoA carboxylase subunit beta	MGCH7_ch7g257 MGG_02541	Magnaporthe oryzae (strain 70-15 / ATCC MYA-4617 / FGSC 8958) (Rice blast fungus) (Pyricularia oryzae)	605			ligase activity [GO:0016874]	ligase activity [GO:0016874]	GO:0016874
				7	2434073	2436238	MGG_02540		protein_coding	Isovaleryl-CoA dehydrogenase 2 [Source:UniProtKB/TrEMBL%3BAcc:G5EHZ3]	broad_genes	G5EHZ3	G5EHZ3_MAGO7	unreviewed	Isovaleryl-CoA dehydrogenase 2	MGCH7_ch7g256 MGG_02540	Magnaporthe oryzae (strain 70-15 / ATCC MYA-4617 / FGSC 8958) (Rice blast fungus) (Pyricularia oryzae)	470			acyl-CoA dehydrogenase activity [GO:0003995]; flavin adenine dinucleotide binding [GO:0050660]	acyl-CoA dehydrogenase activity [GO:0003995]; flavin adenine dinucleotide binding [GO:0050660]	GO:0003995; GO:0050660
				7	2440057	2440577	MGG_18032		protein_coding	Putative uncharacterized protein [Source:UniProtKB/TrEMBL%3BAcc:G4NK34]	broad_genes	G4NK34	G4NK34_MAGO7	unreviewed	Uncharacterized protein	MGG_18032	Magnaporthe oryzae (strain 70-15 / ATCC MYA-4617 / FGSC 8958) (Rice blast fungus) (Pyricularia oryzae)	62
				7	2440802	2442509	MGG_02539		protein_coding	Putative uncharacterized protein [Source:UniProtKB/TrEMBL%3BAcc:G4NK35]	broad_genes	G4NK35	G4NK35_MAGO7	unreviewed	Nudix hydrolase domain-containing protein	MGG_02539	Magnaporthe oryzae (strain 70-15 / ATCC MYA-4617 / FGSC 8958) (Rice blast fungus) (Pyricularia oryzae)	339			hydrolase activity [GO:0016787]	hydrolase activity [GO:0016787]	GO:0016787
				7	2444399	2446750	MGG_02538		protein_coding	Glutamine synthetase [Source:UniProtKB/TrEMBL%3BAcc:G5EHD8]	broad_genes	G5EHD8	G5EHD8_MAGO7	unreviewed	Glutamine synthetase	MGCH7_ch7g251 MGG_02538	Magnaporthe oryzae (strain 70-15 / ATCC MYA-4617 / FGSC 8958) (Rice blast fungus) (Pyricularia oryzae)	481	glutamine biosynthetic process [GO:0006542]		glutamate-ammonia ligase activity [GO:0004356]; glutamine biosynthetic process [GO:0006542]	glutamate-ammonia ligase activity [GO:0004356]	GO:0004356; GO:0006542
				7	2446944	2448938	MGG_12670		protein_coding	Putative uncharacterized protein [Source:UniProtKB/TrEMBL%3BAcc:G4NK37]	broad_genes	G4NK37	G4NK37_MAGO7	unreviewed	Thioredoxin domain-containing protein	MGG_12670	Magnaporthe oryzae (strain 70-15 / ATCC MYA-4617 / FGSC 8958) (Rice blast fungus) (Pyricularia oryzae)	189
				7	2447952	2449265	MGG_12671		protein_coding	Putative uncharacterized protein [Source:UniProtKB/TrEMBL%3BAcc:G5EH17]	broad_genes	G5EH17	G5EH17_MAGO7	unreviewed	Uncharacterized protein	MGCH7_ch7g249 MGG_12671	Magnaporthe oryzae (strain 70-15 / ATCC MYA-4617 / FGSC 8958) (Rice blast fungus) (Pyricularia oryzae)	148			racemase and epimerase activity, acting on carbohydrates and derivatives [GO:0016857]	racemase and epimerase activity, acting on carbohydrates and derivatives [GO:0016857]	GO:0016857
				7	2450497	2453618	MGG_12672		protein_coding	Putative uncharacterized protein [Source:UniProtKB/TrEMBL%3BAcc:G5EHC5]	broad_genes	G5EHC5	G5EHC5_MAGO7	unreviewed	Uncharacterized protein	MGCH7_ch7g248 MGG_12672	Magnaporthe oryzae (strain 70-15 / ATCC MYA-4617 / FGSC 8958) (Rice blast fungus) (Pyricularia oryzae)	545		integral component of membrane [GO:0016021]	integral component of membrane [GO:0016021]		GO:0016021
13	IRBlsh-S_7_2400798	7	2400798	7	2351199	2352836	MGG_02570		protein_coding	Dienelactone hydrolase [Source:UniProtKB/TrEMBL%3BAcc:G4NJW1]	broad_genes	G4NJW1	G4NJW1_MAGO7	unreviewed	Dienelactone hydrolase	MGG_02570	Magnaporthe oryzae (strain 70-15 / ATCC MYA-4617 / FGSC 8958) (Rice blast fungus) (Pyricularia oryzae)	338			hydrolase activity [GO:0016787]	hydrolase activity [GO:0016787]	GO:0016787
				7	2353063	2358537	MGG_02569		protein_coding	Putative uncharacterized protein [Source:UniProtKB/TrEMBL%3BAcc:G5EHW5]	broad_genes	G5EHW5	G5EHW5_MAGO7	unreviewed	Uncharacterized protein	MGCH7_ch7g282 MGG_02569	Magnaporthe oryzae (strain 70-15 / ATCC MYA-4617 / FGSC 8958) (Rice blast fungus) (Pyricularia oryzae)	1671
				7	2358944	2359727	MGG_02568		protein_coding	Ubiquitin-conjugating enzyme E2 35 [Source:UniProtKB/TrEMBL%3BAcc:G4NJW3]	broad_genes	G4NJW3	G4NJW3_MAGO7	unreviewed	Ubiquitin-conjugating enzyme E2 35	MGG_02568	Magnaporthe oryzae (strain 70-15 / ATCC MYA-4617 / FGSC 8958) (Rice blast fungus) (Pyricularia oryzae)	150			ATP binding [GO:0005524]; transferase activity [GO:0016740]	ATP binding [GO:0005524]; transferase activity [GO:0016740]	GO:0005524; GO:0016740
				7	2361862	2364157	MGG_02567		protein_coding	Putative uncharacterized protein [Source:UniProtKB/TrEMBL%3BAcc:G5EHX6]	broad_genes	G5EHX6	G5EHX6_MAGO7	unreviewed	Uncharacterized protein	MGCH7_ch7g280 MGG_02567	Magnaporthe oryzae (strain 70-15 / ATCC MYA-4617 / FGSC 8958) (Rice blast fungus) (Pyricularia oryzae)	224
				7	2364688	2366635	MGG_02566		protein_coding	Trans-2-enoyl-CoA reductase [Source:UniProtKB/TrEMBL%3BAcc:G5EHT4]	broad_genes	G5EHT4	G5EHT4_MAGO7	unreviewed	Trans-2-enoyl-CoA reductase	MGCH7_ch7g279 MGG_02566	Magnaporthe oryzae (strain 70-15 / ATCC MYA-4617 / FGSC 8958) (Rice blast fungus) (Pyricularia oryzae)	428			oxidoreductase activity [GO:0016491]	oxidoreductase activity [GO:0016491]	GO:0016491
				7	2366665	2368305	MGG_02565		protein_coding	Putative uncharacterized protein [Source:UniProtKB/TrEMBL%3BAcc:G5EHT0]	broad_genes	G5EHT0	G5EHT0_MAGO7	unreviewed	Uncharacterized protein	MGCH7_ch7g278 MGG_02565	Magnaporthe oryzae (strain 70-15 / ATCC MYA-4617 / FGSC 8958) (Rice blast fungus) (Pyricularia oryzae)	546
				7	2369751	2370659	MGG_02564		protein_coding	Putative uncharacterized protein [Source:UniProtKB/TrEMBL%3BAcc:G5EI28]	broad_genes	G5EI28	G5EI28_MAGO7	unreviewed	Uncharacterized protein	MGCH7_ch7g277 MGG_02564	Magnaporthe oryzae (strain 70-15 / ATCC MYA-4617 / FGSC 8958) (Rice blast fungus) (Pyricularia oryzae)	302
				7	2371189	2372173	MGG_18029		protein_coding	Putative uncharacterized protein [Source:UniProtKB/TrEMBL%3BAcc:G5EH49]	broad_genes	G5EH49	G5EH49_MAGO7	unreviewed	Uncharacterized protein	MGCH7_ch7g276 MGG_18029	Magnaporthe oryzae (strain 70-15 / ATCC MYA-4617 / FGSC 8958) (Rice blast fungus) (Pyricularia oryzae)	109
				7	2373169	2374580	MGG_02562		protein_coding	Initiation-specific alpha-1%2C6-mannosyltransferase [Source:UniProtKB/TrEMBL%3BAcc:G5EGZ0]	broad_genes	G5EGZ0	G5EGZ0_MAGO7	unreviewed	Initiation-specific alpha-1,6-mannosyltransferase	MGCH7_ch7g275 MGG_02562	Magnaporthe oryzae (strain 70-15 / ATCC MYA-4617 / FGSC 8958) (Rice blast fungus) (Pyricularia oryzae)	333			alpha-1,6-mannosyltransferase activity [GO:0000009]	alpha-1,6-mannosyltransferase activity [GO:0000009]	GO:0000009
				7	2375209	2375899	MGG_18030		protein_coding	Putative uncharacterized protein [Source:UniProtKB/TrEMBL%3BAcc:G4NJX0]	broad_genes	G4NJX0	G4NJX0_MAGO7	unreviewed	Uncharacterized protein	MGG_18030	Magnaporthe oryzae (strain 70-15 / ATCC MYA-4617 / FGSC 8958) (Rice blast fungus) (Pyricularia oryzae)	118
				7	2375386	2375457	EFMOG00000000252	tRNA-Pseudo	tRNA_pseudogene	tRNA-Pseudo for anticodon GUU [Source:TRNASCAN_SE%3BAcc:tRNA-Pseudo]	ncrna_eg	tRNA-Pseudo
				7	2375858	2376168	MGG_02561		protein_coding	Putative uncharacterized protein [Source:UniProtKB/TrEMBL%3BAcc:G4NJX1]	broad_genes	G4NJX1	G4NJX1_MAGO7	unreviewed	Uncharacterized protein	MGG_02561	Magnaporthe oryzae (strain 70-15 / ATCC MYA-4617 / FGSC 8958) (Rice blast fungus) (Pyricularia oryzae)	74
				7	2378914	2379591	MGG_02560		protein_coding	Putative uncharacterized protein [Source:UniProtKB/TrEMBL%3BAcc:G4NJX2]	broad_genes	G4NJX2	G4NJX2_MAGO7	unreviewed	Uncharacterized protein	MGG_02560	Magnaporthe oryzae (strain 70-15 / ATCC MYA-4617 / FGSC 8958) (Rice blast fungus) (Pyricularia oryzae)	160
				7	2379832	2381336	MGG_02559		protein_coding	MOSC domain-containing protein [Source:UniProtKB/TrEMBL%3BAcc:G5EH16]	broad_genes	G5EH16	G5EH16_MAGO7	unreviewed	MOSC domain-containing protein	MGCH7_ch7g272 MGG_02559	Magnaporthe oryzae (strain 70-15 / ATCC MYA-4617 / FGSC 8958) (Rice blast fungus) (Pyricularia oryzae)	397			catalytic activity [GO:0003824]; molybdenum ion binding [GO:0030151]; pyridoxal phosphate binding [GO:0030170]	catalytic activity [GO:0003824]; molybdenum ion binding [GO:0030151]; pyridoxal phosphate binding [GO:0030170]	GO:0003824; GO:0030151; GO:0030170
				7	2382678	2384103	MGG_12664		protein_coding	Putative uncharacterized protein [Source:UniProtKB/TrEMBL%3BAcc:G4NJX4]	broad_genes	G4NJX4	G4NJX4_MAGO7	unreviewed	DLH domain-containing protein	MGG_12664	Magnaporthe oryzae (strain 70-15 / ATCC MYA-4617 / FGSC 8958) (Rice blast fungus) (Pyricularia oryzae)	258			hydrolase activity [GO:0016787]	hydrolase activity [GO:0016787]	GO:0016787
				7	2384503	2384581	EFMOG00000000229	tRNA-Gln	tRNA_pseudogene	tRNA-Gln for anticodon CUG [Source:TRNASCAN_SE%3BAcc:tRNA-Gln]	ncrna_eg	tRNA-Gln
				7	2384503	2384581	ENSRNA049560484	tRNA-Gln	tRNA	tRNA-Gln for anticodon CUG	trnascan_gene
				7	2384769	2385474	MGG_18031		protein_coding	Putative uncharacterized protein [Source:UniProtKB/TrEMBL%3BAcc:G4NJX5]	broad_genes	G4NJX5	G4NJX5_MAGO7	unreviewed	Uncharacterized protein	MGG_18031	Magnaporthe oryzae (strain 70-15 / ATCC MYA-4617 / FGSC 8958) (Rice blast fungus) (Pyricularia oryzae)	151
				7	2387074	2388149	MGG_02557		protein_coding	Putative uncharacterized protein [Source:UniProtKB/TrEMBL%3BAcc:G4NJX6]	broad_genes	G4NJX6	G4NJX6_MAGO7	unreviewed	Uncharacterized protein	MGG_02557	Magnaporthe oryzae (strain 70-15 / ATCC MYA-4617 / FGSC 8958) (Rice blast fungus) (Pyricularia oryzae)	321
				7	2388447	2388989	MGG_02556		protein_coding	Putative uncharacterized protein [Source:UniProtKB/TrEMBL%3BAcc:G4NJX7]	broad_genes	G4NJX7	G4NJX7_MAGO7	unreviewed	Uncharacterized protein	MGG_02556	Magnaporthe oryzae (strain 70-15 / ATCC MYA-4617 / FGSC 8958) (Rice blast fungus) (Pyricularia oryzae)	139
				7	2394131	2394202	EFMOG00000000024	tRNA-Pseudo	tRNA_pseudogene	tRNA-Pseudo for anticodon GUU [Source:TRNASCAN_SE%3BAcc:tRNA-Pseudo]	ncrna_eg	tRNA-Pseudo
				7	2394388	2395048	MGG_15035		protein_coding	Putative uncharacterized protein [Source:UniProtKB/TrEMBL%3BAcc:G4NJX8]	broad_genes	G4NJX8	G4NJX8_MAGO7	unreviewed	Uncharacterized protein	MGG_15035	Magnaporthe oryzae (strain 70-15 / ATCC MYA-4617 / FGSC 8958) (Rice blast fungus) (Pyricularia oryzae)	195
				7	2396291	2397630	MGG_12668		protein_coding	Putative uncharacterized protein [Source:UniProtKB/TrEMBL%3BAcc:G4NJX9]	broad_genes	G4NJX9	G4NJX9_MAGO7	unreviewed	Uncharacterized protein	MGG_12668	Magnaporthe oryzae (strain 70-15 / ATCC MYA-4617 / FGSC 8958) (Rice blast fungus) (Pyricularia oryzae)	337
				7	2404160	2405547	MGG_02550		protein_coding	Putative uncharacterized protein [Source:UniProtKB/TrEMBL%3BAcc:G4NJY0]	broad_genes	G4NJY0	G4NJY0_MAGO7	unreviewed	Uncharacterized protein	MGG_02550	Magnaporthe oryzae (strain 70-15 / ATCC MYA-4617 / FGSC 8958) (Rice blast fungus) (Pyricularia oryzae)	430
				7	2406395	2407483	MGG_02549		protein_coding	Putative uncharacterized protein [Source:UniProtKB/TrEMBL%3BAcc:G5EH97]	broad_genes	G5EH97	G5EH97_MAGO7	unreviewed	AIG1-type G domain-containing protein	MGCH7_ch7g265 MGG_02549	Magnaporthe oryzae (strain 70-15 / ATCC MYA-4617 / FGSC 8958) (Rice blast fungus) (Pyricularia oryzae)	338			GTP binding [GO:0005525]	GTP binding [GO:0005525]	GO:0005525
				7	2408209	2410751	MGG_02548		protein_coding	Putative uncharacterized protein [Source:UniProtKB/TrEMBL%3BAcc:G4NJY2]	broad_genes	G4NJY2	G4NJY2_MAGO7	unreviewed	Uncharacterized protein	MGG_02548	Magnaporthe oryzae (strain 70-15 / ATCC MYA-4617 / FGSC 8958) (Rice blast fungus) (Pyricularia oryzae)	570			ATP binding [GO:0005524]	ATP binding [GO:0005524]	GO:0005524
				7	2413826	2414269	MGG_02546		protein_coding	Putative uncharacterized protein [Source:UniProtKB/TrEMBL%3BAcc:G5EHV4]	broad_genes	G5EHV4	G5EHV4_MAGO7	unreviewed	Uncharacterized protein	MGCH7_ch7g263 MGG_02546	Magnaporthe oryzae (strain 70-15 / ATCC MYA-4617 / FGSC 8958) (Rice blast fungus) (Pyricularia oryzae)	147
				7	2414852	2415915	MGG_02545		protein_coding	Putative uncharacterized protein [Source:UniProtKB/TrEMBL%3BAcc:G5EHB6]	broad_genes	G5EHB6	G5EHB6_MAGO7	unreviewed	EthD domain-containing protein	MGCH7_ch7g262 MGG_02545	Magnaporthe oryzae (strain 70-15 / ATCC MYA-4617 / FGSC 8958) (Rice blast fungus) (Pyricularia oryzae)	126			oxidoreductase activity [GO:0016491]	oxidoreductase activity [GO:0016491]	GO:0016491
				7	2416209	2417905	MGG_02544		protein_coding	D-arabinitol dehydrogenase [Source:UniProtKB/TrEMBL%3BAcc:G4NK29]	broad_genes	G4NK29	G4NK29_MAGO7	unreviewed	D-arabinitol dehydrogenase	MGG_02544	Magnaporthe oryzae (strain 70-15 / ATCC MYA-4617 / FGSC 8958) (Rice blast fungus) (Pyricularia oryzae)	363			oxidoreductase activity [GO:0016491]	oxidoreductase activity [GO:0016491]	GO:0016491
				7	2418800	2419850	MGG_02543		protein_coding	Putative uncharacterized protein [Source:UniProtKB/TrEMBL%3BAcc:G4NK30]	broad_genes	G4NK30	G4NK30_MAGO7	unreviewed	SGNH_hydro domain-containing protein	MGG_02543	Magnaporthe oryzae (strain 70-15 / ATCC MYA-4617 / FGSC 8958) (Rice blast fungus) (Pyricularia oryzae)	291
				7	2425160	2428033	MGG_02542		protein_coding	Putative uncharacterized protein [Source:UniProtKB/TrEMBL%3BAcc:G4NK31]	broad_genes	G4NK31	G4NK31_MAGO7	unreviewed	Uncharacterized protein	MGG_02542	Magnaporthe oryzae (strain 70-15 / ATCC MYA-4617 / FGSC 8958) (Rice blast fungus) (Pyricularia oryzae)	832
				7	2431515	2433908	MGG_02541		protein_coding	Methylcrotonoyl-CoA carboxylase subunit beta [Source:UniProtKB/TrEMBL%3BAcc:G5EH95]	broad_genes	G5EH95	G5EH95_MAGO7	unreviewed	Methylcrotonoyl-CoA carboxylase subunit beta	MGCH7_ch7g257 MGG_02541	Magnaporthe oryzae (strain 70-15 / ATCC MYA-4617 / FGSC 8958) (Rice blast fungus) (Pyricularia oryzae)	605			ligase activity [GO:0016874]	ligase activity [GO:0016874]	GO:0016874
				7	2434073	2436238	MGG_02540		protein_coding	Isovaleryl-CoA dehydrogenase 2 [Source:UniProtKB/TrEMBL%3BAcc:G5EHZ3]	broad_genes	G5EHZ3	G5EHZ3_MAGO7	unreviewed	Isovaleryl-CoA dehydrogenase 2	MGCH7_ch7g256 MGG_02540	Magnaporthe oryzae (strain 70-15 / ATCC MYA-4617 / FGSC 8958) (Rice blast fungus) (Pyricularia oryzae)	470			acyl-CoA dehydrogenase activity [GO:0003995]; flavin adenine dinucleotide binding [GO:0050660]	acyl-CoA dehydrogenase activity [GO:0003995]; flavin adenine dinucleotide binding [GO:0050660]	GO:0003995; GO:0050660
				7	2440057	2440577	MGG_18032		protein_coding	Putative uncharacterized protein [Source:UniProtKB/TrEMBL%3BAcc:G4NK34]	broad_genes	G4NK34	G4NK34_MAGO7	unreviewed	Uncharacterized protein	MGG_18032	Magnaporthe oryzae (strain 70-15 / ATCC MYA-4617 / FGSC 8958) (Rice blast fungus) (Pyricularia oryzae)	62
				7	2440802	2442509	MGG_02539		protein_coding	Putative uncharacterized protein [Source:UniProtKB/TrEMBL%3BAcc:G4NK35]	broad_genes	G4NK35	G4NK35_MAGO7	unreviewed	Nudix hydrolase domain-containing protein	MGG_02539	Magnaporthe oryzae (strain 70-15 / ATCC MYA-4617 / FGSC 8958) (Rice blast fungus) (Pyricularia oryzae)	339			hydrolase activity [GO:0016787]	hydrolase activity [GO:0016787]	GO:0016787
				7	2444399	2446750	MGG_02538		protein_coding	Glutamine synthetase [Source:UniProtKB/TrEMBL%3BAcc:G5EHD8]	broad_genes	G5EHD8	G5EHD8_MAGO7	unreviewed	Glutamine synthetase	MGCH7_ch7g251 MGG_02538	Magnaporthe oryzae (strain 70-15 / ATCC MYA-4617 / FGSC 8958) (Rice blast fungus) (Pyricularia oryzae)	481	glutamine biosynthetic process [GO:0006542]		glutamate-ammonia ligase activity [GO:0004356]; glutamine biosynthetic process [GO:0006542]	glutamate-ammonia ligase activity [GO:0004356]	GO:0004356; GO:0006542
				7	2446944	2448938	MGG_12670		protein_coding	Putative uncharacterized protein [Source:UniProtKB/TrEMBL%3BAcc:G4NK37]	broad_genes	G4NK37	G4NK37_MAGO7	unreviewed	Thioredoxin domain-containing protein	MGG_12670	Magnaporthe oryzae (strain 70-15 / ATCC MYA-4617 / FGSC 8958) (Rice blast fungus) (Pyricularia oryzae)	189
				7	2447952	2449265	MGG_12671		protein_coding	Putative uncharacterized protein [Source:UniProtKB/TrEMBL%3BAcc:G5EH17]	broad_genes	G5EH17	G5EH17_MAGO7	unreviewed	Uncharacterized protein	MGCH7_ch7g249 MGG_12671	Magnaporthe oryzae (strain 70-15 / ATCC MYA-4617 / FGSC 8958) (Rice blast fungus) (Pyricularia oryzae)	148			racemase and epimerase activity, acting on carbohydrates and derivatives [GO:0016857]	racemase and epimerase activity, acting on carbohydrates and derivatives [GO:0016857]	GO:0016857
				7	2450497	2453618	MGG_12672		protein_coding	Putative uncharacterized protein [Source:UniProtKB/TrEMBL%3BAcc:G5EHC5]	broad_genes	G5EHC5	G5EHC5_MAGO7	unreviewed	Uncharacterized protein	MGCH7_ch7g248 MGG_12672	Magnaporthe oryzae (strain 70-15 / ATCC MYA-4617 / FGSC 8958) (Rice blast fungus) (Pyricularia oryzae)	545		integral component of membrane [GO:0016021]	integral component of membrane [GO:0016021]		GO:0016021
14	IRBLk-KA_1_425230	1	425230	1	376032	378592	MGG_02047		protein_coding	Putative uncharacterized protein [Source:UniProtKB/TrEMBL%3BAcc:G4MMV9]	broad_genes	G4MMV9	G4MMV9_MAGO7	unreviewed	Uncharacterized protein	MGG_02047	Magnaporthe oryzae (strain 70-15 / ATCC MYA-4617 / FGSC 8958) (Rice blast fungus) (Pyricularia oryzae)	578
				1	381703	383049	MGG_14609		protein_coding	Putative uncharacterized protein [Source:UniProtKB/TrEMBL%3BAcc:G4MMW0]	broad_genes	G4MMW0	G4MMW0_MAGO7	unreviewed	Protein kinase domain-containing protein	MGG_14609	Magnaporthe oryzae (strain 70-15 / ATCC MYA-4617 / FGSC 8958) (Rice blast fungus) (Pyricularia oryzae)	356			ATP binding [GO:0005524]; protein kinase activity [GO:0004672]	ATP binding [GO:0005524]; protein kinase activity [GO:0004672]	GO:0004672; GO:0005524
				1	383220	384221	MGG_16015		protein_coding	Putative uncharacterized protein [Source:UniProtKB/TrEMBL%3BAcc:G4MMW1]	broad_genes	G4MMW1	G4MMW1_MAGO7	unreviewed	Uncharacterized protein	MGG_16015	Magnaporthe oryzae (strain 70-15 / ATCC MYA-4617 / FGSC 8958) (Rice blast fungus) (Pyricularia oryzae)	74
				1	384779	387021	MGG_02049		protein_coding	Interferon-induced GTP-binding protein Mx2 [Source:UniProtKB/TrEMBL%3BAcc:G4MMW2]	broad_genes	G4MMW2	G4MMW2_MAGO7	unreviewed	Interferon-induced GTP-binding protein Mx2	MGG_02049	Magnaporthe oryzae (strain 70-15 / ATCC MYA-4617 / FGSC 8958) (Rice blast fungus) (Pyricularia oryzae)	711			GTP binding [GO:0005525]; GTPase activity [GO:0003924]	GTPase activity [GO:0003924]; GTP binding [GO:0005525]	GO:0003924; GO:0005525
				1	390210	390530	MGG_16016		pseudogene		broad_genes
				1	391152	392821	MGG_02050		protein_coding	Putative uncharacterized protein [Source:UniProtKB/TrEMBL%3BAcc:G4MMW4]	broad_genes	G4MMW4	G4MMW4_MAGO7	unreviewed	Uncharacterized protein	MGG_02050	Magnaporthe oryzae (strain 70-15 / ATCC MYA-4617 / FGSC 8958) (Rice blast fungus) (Pyricularia oryzae)	369
				1	392967	395203	MGG_02051		protein_coding	CAMK protein kinase [Source:UniProtKB/TrEMBL%3BAcc:G4MMW5]	broad_genes	G4MMW5	G4MMW5_MAGO7	unreviewed	CAMK protein kinase	MGG_02051	Magnaporthe oryzae (strain 70-15 / ATCC MYA-4617 / FGSC 8958) (Rice blast fungus) (Pyricularia oryzae)	644			ATP binding [GO:0005524]; protein kinase activity [GO:0004672]	ATP binding [GO:0005524]; protein kinase activity [GO:0004672]	GO:0004672; GO:0005524
				1	398262	398566	MGG_16017		protein_coding	Putative uncharacterized protein [Source:UniProtKB/TrEMBL%3BAcc:G4MMW6]	broad_genes	G4MMW6	G4MMW6_MAGO7	unreviewed	Uncharacterized protein	MGG_16017	Magnaporthe oryzae (strain 70-15 / ATCC MYA-4617 / FGSC 8958) (Rice blast fungus) (Pyricularia oryzae)	84
				1	402666	403459	MGG_16018		protein_coding	Putative uncharacterized protein [Source:UniProtKB/TrEMBL%3BAcc:G4MN74]	broad_genes	G4MN74	G4MN74_MAGO7	unreviewed	Uncharacterized protein	MGG_16018	Magnaporthe oryzae (strain 70-15 / ATCC MYA-4617 / FGSC 8958) (Rice blast fungus) (Pyricularia oryzae)	127
				1	403751	404557	MGG_16019		protein_coding	Putative uncharacterized protein [Source:UniProtKB/TrEMBL%3BAcc:G4MN75]	broad_genes	G4MN75	G4MN75_MAGO7	unreviewed	Uncharacterized protein	MGG_16019	Magnaporthe oryzae (strain 70-15 / ATCC MYA-4617 / FGSC 8958) (Rice blast fungus) (Pyricularia oryzae)	268
				1	404669	405636	MGG_16020		pseudogene		broad_genes
				1	407927	410609	MGG_16021		protein_coding	Putative uncharacterized protein [Source:UniProtKB/TrEMBL%3BAcc:G4MN77]	broad_genes	G4MN77	G4MN77_MAGO7	unreviewed	Uncharacterized protein	MGG_16021	Magnaporthe oryzae (strain 70-15 / ATCC MYA-4617 / FGSC 8958) (Rice blast fungus) (Pyricularia oryzae)	300
				1	410855	411153	MGG_16022		protein_coding	Putative uncharacterized protein [Source:UniProtKB/TrEMBL%3BAcc:G4MN78]	broad_genes	G4MN78	G4MN78_MAGO7	unreviewed	Uncharacterized protein	MGG_16022	Magnaporthe oryzae (strain 70-15 / ATCC MYA-4617 / FGSC 8958) (Rice blast fungus) (Pyricularia oryzae)	79
				1	412177	414468	MGG_02055		protein_coding	Putative uncharacterized protein [Source:UniProtKB/TrEMBL%3BAcc:G4MN79]	broad_genes	G4MN79	G4MN79_MAGO7	unreviewed	Uncharacterized protein	MGG_02055	Magnaporthe oryzae (strain 70-15 / ATCC MYA-4617 / FGSC 8958) (Rice blast fungus) (Pyricularia oryzae)	615
				1	414777	417691	MGG_02056		protein_coding	Putative uncharacterized protein [Source:UniProtKB/TrEMBL%3BAcc:G4MN80]	broad_genes	G4MN80	G4MN80_MAGO7	unreviewed	Uncharacterized protein	MGG_02056	Magnaporthe oryzae (strain 70-15 / ATCC MYA-4617 / FGSC 8958) (Rice blast fungus) (Pyricularia oryzae)	468
				1	418622	418859	MGG_16023		protein_coding	Putative uncharacterized protein [Source:UniProtKB/TrEMBL%3BAcc:G4MN81]	broad_genes	G4MN81	G4MN81_MAGO7	unreviewed	Uncharacterized protein	MGG_16023	Magnaporthe oryzae (strain 70-15 / ATCC MYA-4617 / FGSC 8958) (Rice blast fungus) (Pyricularia oryzae)	56
				1	419224	420823	MGG_13697		protein_coding	Putative uncharacterized protein [Source:UniProtKB/TrEMBL%3BAcc:G4MN82]	broad_genes	G4MN82	G4MN82_MAGO7	unreviewed	Uncharacterized protein	MGG_13697	Magnaporthe oryzae (strain 70-15 / ATCC MYA-4617 / FGSC 8958) (Rice blast fungus) (Pyricularia oryzae)	354
				1	423459	425367	MGG_02058		protein_coding	Mitochondrial chaperone BCS1 [Source:UniProtKB/TrEMBL%3BAcc:G4MN83]	broad_genes	G4MN83	G4MN83_MAGO7	unreviewed	Mitochondrial chaperone BCS1	MGG_02058	Magnaporthe oryzae (strain 70-15 / ATCC MYA-4617 / FGSC 8958) (Rice blast fungus) (Pyricularia oryzae)	566		mitochondrial inner membrane [GO:0005743]	mitochondrial inner membrane [GO:0005743]; ATP binding [GO:0005524]	ATP binding [GO:0005524]	GO:0005524; GO:0005743
				1	425504	436681	MGG_02059		protein_coding	Putative uncharacterized protein [Source:UniProtKB/TrEMBL%3BAcc:G4MN84]	broad_genes	G4MN84	G4MN84_MAGO7	unreviewed	Uncharacterized protein	MGG_02059	Magnaporthe oryzae (strain 70-15 / ATCC MYA-4617 / FGSC 8958) (Rice blast fungus) (Pyricularia oryzae)	2728
				1	436989	438567	MGG_02060		protein_coding	Aromatic amino acid aminotransferase [Source:UniProtKB/TrEMBL%3BAcc:G4MN85]	broad_genes	G4MN85	G4MN85_MAGO7	unreviewed	Aromatic amino acid aminotransferase	MGG_02060	Magnaporthe oryzae (strain 70-15 / ATCC MYA-4617 / FGSC 8958) (Rice blast fungus) (Pyricularia oryzae)	380			transaminase activity [GO:0008483]	transaminase activity [GO:0008483]	GO:0008483
				1	438779	441375	MGG_02061		protein_coding	CAMK protein kinase [Source:UniProtKB/TrEMBL%3BAcc:G4MN86]	broad_genes	G4MN86	G4MN86_MAGO7	unreviewed	CAMK protein kinase	MGG_02061	Magnaporthe oryzae (strain 70-15 / ATCC MYA-4617 / FGSC 8958) (Rice blast fungus) (Pyricularia oryzae)	678			ATP binding [GO:0005524]; protein kinase activity [GO:0004672]	ATP binding [GO:0005524]; protein kinase activity [GO:0004672]	GO:0004672; GO:0005524
				1	441828	443033	MGG_02062		protein_coding	Putative uncharacterized protein [Source:UniProtKB/TrEMBL%3BAcc:G4MN87]	broad_genes	G4MN87	G4MN87_MAGO7	unreviewed	Uncharacterized protein	MGG_02062	Magnaporthe oryzae (strain 70-15 / ATCC MYA-4617 / FGSC 8958) (Rice blast fungus) (Pyricularia oryzae)	401
				1	444783	445572	MGG_02063		protein_coding	Putative uncharacterized protein [Source:UniProtKB/TrEMBL%3BAcc:G4MN88]	broad_genes	G4MN88	G4MN88_MAGO7	unreviewed	Uncharacterized protein	MGG_02063	Magnaporthe oryzae (strain 70-15 / ATCC MYA-4617 / FGSC 8958) (Rice blast fungus) (Pyricularia oryzae)	168
				1	446158	446873	MGG_16024		protein_coding	Putative uncharacterized protein [Source:UniProtKB/TrEMBL%3BAcc:G4MN89]	broad_genes	G4MN89	G4MN89_MAGO7	unreviewed	Uncharacterized protein	MGG_16024	Magnaporthe oryzae (strain 70-15 / ATCC MYA-4617 / FGSC 8958) (Rice blast fungus) (Pyricularia oryzae)	82
				1	447084	449238	MGG_02064		protein_coding	Putative uncharacterized protein [Source:UniProtKB/TrEMBL%3BAcc:G4MN90]	broad_genes	G4MN90	G4MN90_MAGO7	unreviewed	Helo_like_N domain-containing protein	MGG_02064	Magnaporthe oryzae (strain 70-15 / ATCC MYA-4617 / FGSC 8958) (Rice blast fungus) (Pyricularia oryzae)	402
				1	449320	449924	MGG_16025		protein_coding	Putative uncharacterized protein [Source:UniProtKB/TrEMBL%3BAcc:G4MN91]	broad_genes	G4MN91	G4MN91_MAGO7	unreviewed	MADS-box domain-containing protein	MGG_16025	Magnaporthe oryzae (strain 70-15 / ATCC MYA-4617 / FGSC 8958) (Rice blast fungus) (Pyricularia oryzae)	95		nucleus [GO:0005634]	nucleus [GO:0005634]; DNA binding [GO:0003677]; protein dimerization activity [GO:0046983]	DNA binding [GO:0003677]; protein dimerization activity [GO:0046983]	GO:0003677; GO:0005634; GO:0046983
				1	451821	455035	MGG_02065		protein_coding	Kinesin light chain%2C variant [Source:UniProtKB/TrEMBL%3BAcc:G4MN92]	broad_genes	G4MN92	G4MN92_MAGO7	unreviewed	Kinesin light chain, variant	MGG_02065	Magnaporthe oryzae (strain 70-15 / ATCC MYA-4617 / FGSC 8958) (Rice blast fungus) (Pyricularia oryzae)	829	nucleoside metabolic process [GO:0009116]		ADP binding [GO:0043531]; catalytic activity [GO:0003824]; nucleoside metabolic process [GO:0009116]	ADP binding [GO:0043531]; catalytic activity [GO:0003824]	GO:0003824; GO:0009116; GO:0043531
				1	458385	459315	MGG_16026		protein_coding	Putative uncharacterized protein [Source:UniProtKB/TrEMBL%3BAcc:G4MN94]	broad_genes	G4MN94	G4MN94_MAGO7	unreviewed	Uncharacterized protein	MGG_16026	Magnaporthe oryzae (strain 70-15 / ATCC MYA-4617 / FGSC 8958) (Rice blast fungus) (Pyricularia oryzae)	122
				1	461169	462816	MGG_02067		protein_coding	Putative uncharacterized protein [Source:UniProtKB/TrEMBL%3BAcc:G4MN95]	broad_genes	G4MN95	G4MN95_MAGO7	unreviewed	Uncharacterized protein (Fragment)	MGG_02067	Magnaporthe oryzae (strain 70-15 / ATCC MYA-4617 / FGSC 8958) (Rice blast fungus) (Pyricularia oryzae)	270
				1	464651	466024	MGG_16027		protein_coding	Putative uncharacterized protein [Source:UniProtKB/TrEMBL%3BAcc:G4MN96]	broad_genes	G4MN96	G4MN96_MAGO7	unreviewed	Uncharacterized protein	MGG_16027	Magnaporthe oryzae (strain 70-15 / ATCC MYA-4617 / FGSC 8958) (Rice blast fungus) (Pyricularia oryzae)	413
				1	471934	472230	MGG_16028		protein_coding	Putative uncharacterized protein [Source:UniProtKB/TrEMBL%3BAcc:G4MN97]	broad_genes	G4MN97	G4MN97_MAGO7	unreviewed	Uncharacterized protein	MGG_16028	Magnaporthe oryzae (strain 70-15 / ATCC MYA-4617 / FGSC 8958) (Rice blast fungus) (Pyricularia oryzae)	74
				1	472722	473859	MGG_02069		protein_coding	Glyoxalase/bleomycin resistance protein/dioxygenase [Source:UniProtKB/TrEMBL%3BAcc:G4MN98]	broad_genes	G4MN98	G4MN98_MAGO7	unreviewed	Glyoxalase/bleomycin resistance protein/dioxygenase	MGG_02069	Magnaporthe oryzae (strain 70-15 / ATCC MYA-4617 / FGSC 8958) (Rice blast fungus) (Pyricularia oryzae)	131			dioxygenase activity [GO:0051213]	dioxygenase activity [GO:0051213]	GO:0051213
				1	473626	477722	MGG_02070		protein_coding	Putative uncharacterized protein [Source:UniProtKB/TrEMBL%3BAcc:G4MN99]	broad_genes	G4MN99	G4MN99_MAGO7	unreviewed	Uncharacterized protein	MGG_02070	Magnaporthe oryzae (strain 70-15 / ATCC MYA-4617 / FGSC 8958) (Rice blast fungus) (Pyricularia oryzae)	181
				1	475016	477515	MGG_02071		protein_coding	Cryptochrome-1 [Source:UniProtKB/TrEMBL%3BAcc:G4MNA0]	broad_genes	G4MNA0	G4MNA0_MAGO7	unreviewed	Cryptochrome-1	MGG_02071	Magnaporthe oryzae (strain 70-15 / ATCC MYA-4617 / FGSC 8958) (Rice blast fungus) (Pyricularia oryzae)	679
15	IRBLk-KA_1_6669832	1	6669832	1	6627419	6628275	MGG_16480		protein_coding	Putative uncharacterized protein [Source:UniProtKB/TrEMBL%3BAcc:G4MQE7]	broad_genes	G4MQE7	G4MQE7_MAGO7	unreviewed	Uncharacterized protein	MGG_16480	Magnaporthe oryzae (strain 70-15 / ATCC MYA-4617 / FGSC 8958) (Rice blast fungus) (Pyricularia oryzae)	222
				1	6628427	6628498	EFMOG00000000060	tRNA-Pseudo	tRNA_pseudogene	tRNA-Pseudo for anticodon GUU [Source:TRNASCAN_SE%3BAcc:tRNA-Pseudo]	ncrna_eg	tRNA-Pseudo
				1	6630366	6631465	MGG_16481		protein_coding	Putative uncharacterized protein [Source:UniProtKB/TrEMBL%3BAcc:G4MQE8]	broad_genes	G4MQE8	G4MQE8_MAGO7	unreviewed	Metallophos domain-containing protein	MGG_16481	Magnaporthe oryzae (strain 70-15 / ATCC MYA-4617 / FGSC 8958) (Rice blast fungus) (Pyricularia oryzae)	290			hydrolase activity [GO:0016787]	hydrolase activity [GO:0016787]	GO:0016787
				1	6631922	6633258	MGG_15320		protein_coding	Putative uncharacterized protein [Source:UniProtKB/TrEMBL%3BAcc:G4MQE9]	broad_genes	G4MQE9	G4MQE9_MAGO7	unreviewed	BTB domain-containing protein	MGG_15320	Magnaporthe oryzae (strain 70-15 / ATCC MYA-4617 / FGSC 8958) (Rice blast fungus) (Pyricularia oryzae)	209
				1	6635748	6636832	MGG_10887		protein_coding	Putative uncharacterized protein [Source:UniProtKB/TrEMBL%3BAcc:G4MQF0]	broad_genes	G4MQF0	G4MQF0_MAGO7	unreviewed	Uncharacterized protein	MGG_10887	Magnaporthe oryzae (strain 70-15 / ATCC MYA-4617 / FGSC 8958) (Rice blast fungus) (Pyricularia oryzae)	157
				1	6639999	6640693	MGG_16482		protein_coding	Putative uncharacterized protein [Source:UniProtKB/TrEMBL%3BAcc:G4MQF1]	broad_genes	G4MQF1	G4MQF1_MAGO7	unreviewed	Uncharacterized protein	MGG_16482	Magnaporthe oryzae (strain 70-15 / ATCC MYA-4617 / FGSC 8958) (Rice blast fungus) (Pyricularia oryzae)	217
				1	6640940	6641599	MGG_16483		protein_coding	Putative uncharacterized protein [Source:UniProtKB/TrEMBL%3BAcc:G4MQF2]	broad_genes	G4MQF2	G4MQF2_MAGO7	unreviewed	Uncharacterized protein	MGG_16483	Magnaporthe oryzae (strain 70-15 / ATCC MYA-4617 / FGSC 8958) (Rice blast fungus) (Pyricularia oryzae)	219
				1	6650038	6650568	MGG_15319		protein_coding	Putative uncharacterized protein [Source:UniProtKB/TrEMBL%3BAcc:G4MQF3]	broad_genes	G4MQF3	G4MQF3_MAGO7	unreviewed	Uncharacterized protein	MGG_15319	Magnaporthe oryzae (strain 70-15 / ATCC MYA-4617 / FGSC 8958) (Rice blast fungus) (Pyricularia oryzae)	84
				1	6652334	6653725	MGG_15318		protein_coding	Putative uncharacterized protein [Source:UniProtKB/TrEMBL%3BAcc:G4MQF4]	broad_genes	G4MQF4	G4MQF4_MAGO7	unreviewed	Uncharacterized protein	MGG_15318	Magnaporthe oryzae (strain 70-15 / ATCC MYA-4617 / FGSC 8958) (Rice blast fungus) (Pyricularia oryzae)	463
				1	6655279	6655979	MGG_16484		protein_coding	Putative uncharacterized protein [Source:UniProtKB/TrEMBL%3BAcc:G4MQF5]	broad_genes	G4MQF5	G4MQF5_MAGO7	unreviewed	Uncharacterized protein	MGG_16484	Magnaporthe oryzae (strain 70-15 / ATCC MYA-4617 / FGSC 8958) (Rice blast fungus) (Pyricularia oryzae)	61
				1	6657310	6658129	MGG_16485		protein_coding	Putative uncharacterized protein [Source:UniProtKB/TrEMBL%3BAcc:G4MQF6]	broad_genes	G4MQF6	G4MQF6_MAGO7	unreviewed	Uncharacterized protein	MGG_16485	Magnaporthe oryzae (strain 70-15 / ATCC MYA-4617 / FGSC 8958) (Rice blast fungus) (Pyricularia oryzae)	86
				1	6660377	6668526	MGG_16486		protein_coding	Putative uncharacterized protein [Source:UniProtKB/TrEMBL%3BAcc:G4MQF7]	broad_genes	G4MQF7	G4MQF7_MAGO7	unreviewed	Uncharacterized protein	MGG_16486	Magnaporthe oryzae (strain 70-15 / ATCC MYA-4617 / FGSC 8958) (Rice blast fungus) (Pyricularia oryzae)	2382
				1	6664028	6664099	EFMOG00000000357	tRNA-Pseudo	tRNA_pseudogene	tRNA-Pseudo for anticodon GUU [Source:TRNASCAN_SE%3BAcc:tRNA-Pseudo]	ncrna_eg	tRNA-Pseudo
				1	6669695	6670623	MGG_04810		protein_coding	Putative uncharacterized protein [Source:UniProtKB/TrEMBL%3BAcc:G4MQF8]	broad_genes	G4MQF8	G4MQF8_MAGO7	unreviewed	Uncharacterized protein	MGG_04810	Magnaporthe oryzae (strain 70-15 / ATCC MYA-4617 / FGSC 8958) (Rice blast fungus) (Pyricularia oryzae)	117
				1	6670816	6671359	MGG_16487		protein_coding	Putative uncharacterized protein [Source:UniProtKB/TrEMBL%3BAcc:G4MQF9]	broad_genes	G4MQF9	G4MQF9_MAGO7	unreviewed	Uncharacterized protein	MGG_16487	Magnaporthe oryzae (strain 70-15 / ATCC MYA-4617 / FGSC 8958) (Rice blast fungus) (Pyricularia oryzae)	100
				1	6678825	6679376	MGG_16488		pseudogene		broad_genes
				1	6690024	6690650	MGG_16489		protein_coding	Putative uncharacterized protein [Source:UniProtKB/TrEMBL%3BAcc:G4NG85]	broad_genes	G4NG85	G4NG85_MAGO7	unreviewed	Uncharacterized protein	MGG_14965 MGG_16489	Magnaporthe oryzae (strain 70-15 / ATCC MYA-4617 / FGSC 8958) (Rice blast fungus) (Pyricularia oryzae)	208
				1	6691401	6692497	MGG_16490		protein_coding	Putative uncharacterized protein [Source:UniProtKB/TrEMBL%3BAcc:G4MQG2]	broad_genes	G4MQG2	G4MQG2_MAGO7	unreviewed	Chromo domain-containing protein	MGG_16490	Magnaporthe oryzae (strain 70-15 / ATCC MYA-4617 / FGSC 8958) (Rice blast fungus) (Pyricularia oryzae)	254
				1	6693500	6693847	MGG_04795		protein_coding	Biotrophy-associated secreted protein 1 [Source:UniProtKB/TrEMBL%3BAcc:G5EHI7]	broad_genes	G5EHI7	BAS1_MAGO7	reviewed	Biotrophy-associated secreted protein 1	BAS1 MGG_04795	Magnaporthe oryzae (strain 70-15 / ATCC MYA-4617 / FGSC 8958) (Rice blast fungus) (Pyricularia oryzae)	115		extracellular region [GO:0005576]; host cell cytoplasm [GO:0030430]	extracellular region [GO:0005576]; host cell cytoplasm [GO:0030430]		GO:0005576; GO:0030430
				1	6697160	6697969	MGG_13756		protein_coding	Putative uncharacterized protein [Source:UniProtKB/TrEMBL%3BAcc:G4MQG4]	broad_genes	G4MQG4	G4MQG4_MAGO7	unreviewed	Uncharacterized protein	MGG_13756	Magnaporthe oryzae (strain 70-15 / ATCC MYA-4617 / FGSC 8958) (Rice blast fungus) (Pyricularia oryzae)	269
				1	6698397	6699311	MGG_04787		protein_coding	Tetracenomycin polyketide synthesis O-methyltransferase tcmP [Source:UniProtKB/TrEMBL%3BAcc:G4MQG5]	broad_genes	G4MQG5	G4MQG5_MAGO7	unreviewed	Tetracenomycin polyketide synthesis O-methyltransferase tcmP	MGG_04787	Magnaporthe oryzae (strain 70-15 / ATCC MYA-4617 / FGSC 8958) (Rice blast fungus) (Pyricularia oryzae)	304	methylation [GO:0032259]		methyltransferase activity [GO:0008168]; methylation [GO:0032259]	methyltransferase activity [GO:0008168]	GO:0008168; GO:0032259
				1	6701011	6701907	MGG_16491		protein_coding	Putative uncharacterized protein [Source:UniProtKB/TrEMBL%3BAcc:G4MQG6]	broad_genes	G4MQG6	G4MQG6_MAGO7	unreviewed	Uncharacterized protein	MGG_16491	Magnaporthe oryzae (strain 70-15 / ATCC MYA-4617 / FGSC 8958) (Rice blast fungus) (Pyricularia oryzae)	178
				1	6704178	6706661	MGG_16492		protein_coding	Putative uncharacterized protein [Source:UniProtKB/TrEMBL%3BAcc:G4MQG7]	broad_genes	G4MQG7	G4MQG7_MAGO7	unreviewed	Uncharacterized protein	MGG_16492	Magnaporthe oryzae (strain 70-15 / ATCC MYA-4617 / FGSC 8958) (Rice blast fungus) (Pyricularia oryzae)	357
				1	6707810	6709767	MGG_04784		protein_coding	Putative uncharacterized protein [Source:UniProtKB/TrEMBL%3BAcc:G4MQG8]	broad_genes	G4MQG8	G4MQG8_MAGO7	unreviewed	Uncharacterized protein	MGG_04784	Magnaporthe oryzae (strain 70-15 / ATCC MYA-4617 / FGSC 8958) (Rice blast fungus) (Pyricularia oryzae)	516
				1	6709833	6710486	MGG_16493		protein_coding	Putative uncharacterized protein [Source:UniProtKB/TrEMBL%3BAcc:G4MP69]	broad_genes	G4MP69	G4MP69_MAGO7	unreviewed	Uncharacterized protein	MGG_16045 MGG_16493	Magnaporthe oryzae (strain 70-15 / ATCC MYA-4617 / FGSC 8958) (Rice blast fungus) (Pyricularia oryzae)	86
				1	6714022	6715109	MGG_16494		protein_coding	Putative uncharacterized protein [Source:UniProtKB/TrEMBL%3BAcc:G4MQS5]	broad_genes	G4MQS5	G4MQS5_MAGO7	unreviewed	Uncharacterized protein	MGG_16494 MGG_16501	Magnaporthe oryzae (strain 70-15 / ATCC MYA-4617 / FGSC 8958) (Rice blast fungus) (Pyricularia oryzae)	136
				1	6716655	6717279	MGG_15314		protein_coding	Putative uncharacterized protein [Source:UniProtKB/TrEMBL%3BAcc:G4MQS6]	broad_genes	G4MQS6	G4MQS6_MAGO7	unreviewed	Uncharacterized protein	MGG_15314	Magnaporthe oryzae (strain 70-15 / ATCC MYA-4617 / FGSC 8958) (Rice blast fungus) (Pyricularia oryzae)	108
				1	6717280	6721200	MGG_15313		protein_coding	Ankyrin repeat and protein kinase domain-containing protein 1 [Source:UniProtKB/TrEMBL%3BAcc:G4MQS7]	broad_genes	G4MQS7	G4MQS7_MAGO7	unreviewed	Ankyrin repeat and protein kinase domain-containing protein 1	MGG_15313	Magnaporthe oryzae (strain 70-15 / ATCC MYA-4617 / FGSC 8958) (Rice blast fungus) (Pyricularia oryzae)	1142		integral component of membrane [GO:0016021]	integral component of membrane [GO:0016021]; kinase activity [GO:0016301]; metal ion transmembrane transporter activity [GO:0046873]	kinase activity [GO:0016301]; metal ion transmembrane transporter activity [GO:0046873]	GO:0016021; GO:0016301; GO:0046873
16	IRBLk-KA_1_5639396	1	5639396	1	5597660	5598123	MGG_16401		pseudogene		broad_genes
				1	5603730	5605260	MGG_05551		protein_coding	Putative uncharacterized protein [Source:UniProtKB/TrEMBL%3BAcc:G4MMN8]	broad_genes	G4MMN8	G4MMN8_MAGO7	unreviewed	Uncharacterized protein	MGG_05551	Magnaporthe oryzae (strain 70-15 / ATCC MYA-4617 / FGSC 8958) (Rice blast fungus) (Pyricularia oryzae)	495		integral component of membrane [GO:0016021]	integral component of membrane [GO:0016021]		GO:0016021
				1	5606881	5607952	MGG_05552		protein_coding	Putative uncharacterized protein [Source:UniProtKB/TrEMBL%3BAcc:G4MMN9]	broad_genes	G4MMN9	G4MMN9_MAGO7	unreviewed	Uncharacterized protein	MGG_05552	Magnaporthe oryzae (strain 70-15 / ATCC MYA-4617 / FGSC 8958) (Rice blast fungus) (Pyricularia oryzae)	211
				1	5608934	5611108	MGG_13110		protein_coding	Putative uncharacterized protein [Source:UniProtKB/TrEMBL%3BAcc:G4MMP0]	broad_genes	G4MMP0	G4MMP0_MAGO7	unreviewed	Uncharacterized protein	MGG_13110	Magnaporthe oryzae (strain 70-15 / ATCC MYA-4617 / FGSC 8958) (Rice blast fungus) (Pyricularia oryzae)	627			flavin adenine dinucleotide binding [GO:0050660]; N,N-dimethylaniline monooxygenase activity [GO:0004499]; NADP binding [GO:0050661]	flavin adenine dinucleotide binding [GO:0050660]; N,N-dimethylaniline monooxygenase activity [GO:0004499]; NADP binding [GO:0050661]	GO:0004499; GO:0050660; GO:0050661
				1	5611773	5613589	MGG_05553		protein_coding	Putative uncharacterized protein [Source:UniProtKB/TrEMBL%3BAcc:G4MMP1]	broad_genes	G4MMP1	G4MMP1_MAGO7	unreviewed	Uncharacterized protein	MGG_05553	Magnaporthe oryzae (strain 70-15 / ATCC MYA-4617 / FGSC 8958) (Rice blast fungus) (Pyricularia oryzae)	481		integral component of membrane [GO:0016021]	integral component of membrane [GO:0016021]		GO:0016021
				1	5613792	5615436	MGG_05554		protein_coding	Putative uncharacterized protein [Source:UniProtKB/TrEMBL%3BAcc:G4MMP2]	broad_genes	G4MMP2	G4MMP2_MAGO7	unreviewed	ADH_N domain-containing protein	MGG_05554	Magnaporthe oryzae (strain 70-15 / ATCC MYA-4617 / FGSC 8958) (Rice blast fungus) (Pyricularia oryzae)	466
				1	5616055	5618140	MGG_05555		protein_coding	Xenobiotic compound monooxygenase [Source:UniProtKB/TrEMBL%3BAcc:G4MMP3]	broad_genes	G4MMP3	G4MMP3_MAGO7	unreviewed	Xenobiotic compound monooxygenase	MGG_05555	Magnaporthe oryzae (strain 70-15 / ATCC MYA-4617 / FGSC 8958) (Rice blast fungus) (Pyricularia oryzae)	481			monooxygenase activity [GO:0004497]; oxidoreductase activity, acting on paired donors, with incorporation or reduction of molecular oxygen [GO:0016705]	monooxygenase activity [GO:0004497]; oxidoreductase activity, acting on paired donors, with incorporation or reduction of molecular oxygen [GO:0016705]	GO:0004497; GO:0016705
				1	5620909	5621906	MGG_16402		protein_coding	Putative uncharacterized protein [Source:UniProtKB/TrEMBL%3BAcc:G4MMP4]	broad_genes	G4MMP4	G4MMP4_MAGO7	unreviewed	Uncharacterized protein	MGG_16402	Magnaporthe oryzae (strain 70-15 / ATCC MYA-4617 / FGSC 8958) (Rice blast fungus) (Pyricularia oryzae)	268
				1	5625059	5625850	MGG_15152		protein_coding	Putative uncharacterized protein [Source:UniProtKB/TrEMBL%3BAcc:G4MMP5]	broad_genes	G4MMP5	G4MMP5_MAGO7	unreviewed	Uncharacterized protein	MGG_15152	Magnaporthe oryzae (strain 70-15 / ATCC MYA-4617 / FGSC 8958) (Rice blast fungus) (Pyricularia oryzae)	263
				1	5626668	5628227	MGG_16403		protein_coding	Putative uncharacterized protein [Source:UniProtKB/TrEMBL%3BAcc:G4MMP6]	broad_genes	G4MMP6	G4MMP6_MAGO7	unreviewed	Uncharacterized protein	MGG_16403	Magnaporthe oryzae (strain 70-15 / ATCC MYA-4617 / FGSC 8958) (Rice blast fungus) (Pyricularia oryzae)	337
				1	5631875	5632201	MGG_15150		protein_coding	Putative uncharacterized protein [Source:UniProtKB/TrEMBL%3BAcc:G4MMP7]	broad_genes	G4MMP7	G4MMP7_MAGO7	unreviewed	Uncharacterized protein	MGG_15150	Magnaporthe oryzae (strain 70-15 / ATCC MYA-4617 / FGSC 8958) (Rice blast fungus) (Pyricularia oryzae)	108
				1	5632954	5633559	MGG_16404		protein_coding	Putative uncharacterized protein [Source:UniProtKB/TrEMBL%3BAcc:G4MMP8]	broad_genes	G4MMP8	G4MMP8_MAGO7	unreviewed	Uncharacterized protein	MGG_16404	Magnaporthe oryzae (strain 70-15 / ATCC MYA-4617 / FGSC 8958) (Rice blast fungus) (Pyricularia oryzae)	142
				1	5638749	5639211	MGG_16405		pseudogene		broad_genes
				1	5639910	5640233	MGG_16406		pseudogene		broad_genes
				1	5665173	5665635	MGG_16407		pseudogene		broad_genes
				1	5669026	5669881	MGG_05564		protein_coding	Putative uncharacterized protein [Source:UniProtKB/TrEMBL%3BAcc:G4MMQ2]	broad_genes	G4MMQ2	G4MMQ2_MAGO7	unreviewed	Uncharacterized protein	MGG_05564	Magnaporthe oryzae (strain 70-15 / ATCC MYA-4617 / FGSC 8958) (Rice blast fungus) (Pyricularia oryzae)	250
				1	5670334	5671468	MGG_05565		protein_coding	Putative uncharacterized protein [Source:UniProtKB/TrEMBL%3BAcc:G4MMQ3]	broad_genes	G4MMQ3	G4MMQ3_MAGO7	unreviewed	GST C-terminal domain-containing protein	MGG_05565	Magnaporthe oryzae (strain 70-15 / ATCC MYA-4617 / FGSC 8958) (Rice blast fungus) (Pyricularia oryzae)	237	glutathione metabolic process [GO:0006749]		glutathione metabolic process [GO:0006749]		GO:0006749
				1	5672974	5674498	MGG_13116		protein_coding	Putative uncharacterized protein [Source:UniProtKB/TrEMBL%3BAcc:G4MMQ4]	broad_genes	G4MMQ4	G4MMQ4_MAGO7	unreviewed	Uncharacterized protein	MGG_13116	Magnaporthe oryzae (strain 70-15 / ATCC MYA-4617 / FGSC 8958) (Rice blast fungus) (Pyricularia oryzae)	443
				1	5674230	5676091	MGG_16408		protein_coding	Putative uncharacterized protein [Source:UniProtKB/TrEMBL%3BAcc:G4MMQ5]	broad_genes	G4MMQ5	G4MMQ5_MAGO7	unreviewed	CENP-V/GFA domain-containing protein	MGG_16408	Magnaporthe oryzae (strain 70-15 / ATCC MYA-4617 / FGSC 8958) (Rice blast fungus) (Pyricularia oryzae)	143			carbon-sulfur lyase activity [GO:0016846]; metal ion binding [GO:0046872]	carbon-sulfur lyase activity [GO:0016846]; metal ion binding [GO:0046872]	GO:0016846; GO:0046872
				1	5675861	5676748	MGG_13118		protein_coding	Putative uncharacterized protein [Source:UniProtKB/TrEMBL%3BAcc:G4MMQ6]	broad_genes	G4MMQ6	G4MMQ6_MAGO7	unreviewed	Uncharacterized protein	MGG_13118	Magnaporthe oryzae (strain 70-15 / ATCC MYA-4617 / FGSC 8958) (Rice blast fungus) (Pyricularia oryzae)	184
				1	5676286	5679499	MGG_13119		protein_coding	Putative uncharacterized protein [Source:UniProtKB/TrEMBL%3BAcc:G4MMQ7]	broad_genes	G4MMQ7	G4MMQ7_MAGO7	unreviewed	Uncharacterized protein	MGG_13119	Magnaporthe oryzae (strain 70-15 / ATCC MYA-4617 / FGSC 8958) (Rice blast fungus) (Pyricularia oryzae)	531
				1	5679549	5680663	MGG_05567		protein_coding	Putative uncharacterized protein [Source:UniProtKB/TrEMBL%3BAcc:G4MMQ8]	broad_genes	G4MMQ8	G4MMQ8_MAGO7	unreviewed	4HBT domain-containing protein	MGG_05567	Magnaporthe oryzae (strain 70-15 / ATCC MYA-4617 / FGSC 8958) (Rice blast fungus) (Pyricularia oryzae)	246
				1	5680752	5682210	MGG_05568		protein_coding	Putative uncharacterized protein [Source:UniProtKB/TrEMBL%3BAcc:G4MMQ9]	broad_genes	G4MMQ9	G4MMQ9_MAGO7	unreviewed	Presequence translocated-associated motor subunit PAM17	MGG_05568	Magnaporthe oryzae (strain 70-15 / ATCC MYA-4617 / FGSC 8958) (Rice blast fungus) (Pyricularia oryzae)	238	protein import into mitochondrial matrix [GO:0030150]	integral component of membrane [GO:0016021]; PAM complex, Tim23 associated import motor [GO:0001405]	integral component of membrane [GO:0016021]; PAM complex, Tim23 associated import motor [GO:0001405]; protein import into mitochondrial matrix [GO:0030150]		GO:0001405; GO:0016021; GO:0030150
				1	5681896	5683799	MGG_05569	UBA4	protein_coding	Adenylyltransferase and sulfurtransferase UBA4 Adenylyltransferase UBA4 Sulfurtransferase UBA4 [Source:UniProtKB/Swiss-Prot%3BAcc:A4RPM5]	broad_genes
				1	5684010	5685054	MGG_05570		protein_coding	Putative uncharacterized protein [Source:UniProtKB/TrEMBL%3BAcc:G4MMR1]	broad_genes	G4MMR1	G4MMR1_MAGO7	unreviewed	Ribosome biogenesis protein SLX9	MGG_05570	Magnaporthe oryzae (strain 70-15 / ATCC MYA-4617 / FGSC 8958) (Rice blast fungus) (Pyricularia oryzae)	208	maturation of SSU-rRNA from tricistronic rRNA transcript (SSU-rRNA, 5.8S rRNA, LSU-rRNA) [GO:0000462]	90S preribosome [GO:0030686]; nucleolus [GO:0005730]; preribosome, small subunit precursor [GO:0030688]	90S preribosome [GO:0030686]; nucleolus [GO:0005730]; preribosome, small subunit precursor [GO:0030688]; maturation of SSU-rRNA from tricistronic rRNA transcript (SSU-rRNA, 5.8S rRNA, LSU-rRNA) [GO:0000462]		GO:0000462; GO:0005730; GO:0030686; GO:0030688
				1	5685511	5687706	MGG_05571		protein_coding	Putative uncharacterized protein [Source:UniProtKB/TrEMBL%3BAcc:G4MMR2]	broad_genes	G4MMR2	G4MMR2_MAGO7	unreviewed	ULP_PROTEASE domain-containing protein	MGG_05571	Magnaporthe oryzae (strain 70-15 / ATCC MYA-4617 / FGSC 8958) (Rice blast fungus) (Pyricularia oryzae)	259			NEDD8-specific protease activity [GO:0019784]	NEDD8-specific protease activity [GO:0019784]	GO:0019784
				1	5688050	5691019	MGG_05572		protein_coding	Putative uncharacterized protein [Source:UniProtKB/TrEMBL%3BAcc:G4MN22]	broad_genes	G4MN22	G4MN22_MAGO7	unreviewed	Uncharacterized protein	MGG_05572	Magnaporthe oryzae (strain 70-15 / ATCC MYA-4617 / FGSC 8958) (Rice blast fungus) (Pyricularia oryzae)	557
17	IRBLk-KA_2_8137518	2	8137518	2	8086620	8089191	MGG_08258		protein_coding	Putative uncharacterized protein [Source:UniProtKB/TrEMBL%3BAcc:G4MXC2]	broad_genes	G4MXC2	G4MXC2_MAGO7	unreviewed	Uncharacterized protein	MGG_08258	Magnaporthe oryzae (strain 70-15 / ATCC MYA-4617 / FGSC 8958) (Rice blast fungus) (Pyricularia oryzae)	629		integral component of membrane [GO:0016021]	integral component of membrane [GO:0016021]; transmembrane transporter activity [GO:0022857]	transmembrane transporter activity [GO:0022857]	GO:0016021; GO:0022857
				2	8090085	8093507	MGG_08257		protein_coding	Fatty acid transporter%3B Fatty acid transporter%2C variant [Source:UniProtKB/TrEMBL%3BAcc:G4MXC3]	broad_genes	G4MXC3	G4MXC3_MAGO7	unreviewed	Fatty acid transporter (Fatty acid transporter, variant)	MGG_08257	Magnaporthe oryzae (strain 70-15 / ATCC MYA-4617 / FGSC 8958) (Rice blast fungus) (Pyricularia oryzae)	635	fatty acid biosynthetic process [GO:0006633]; long-chain fatty acid import into cell [GO:0044539]; protein quality control for misfolded or incompletely synthesized proteins [GO:0006515]; very long-chain fatty acid metabolic process [GO:0000038]	endoplasmic reticulum [GO:0005783]; intrinsic component of the cytoplasmic side of the plasma membrane [GO:0031235]; lipid droplet [GO:0005811]; peroxisome [GO:0005777]	endoplasmic reticulum [GO:0005783]; intrinsic component of the cytoplasmic side of the plasma membrane [GO:0031235]; lipid droplet [GO:0005811]; peroxisome [GO:0005777]; long-chain fatty acid transporter activity [GO:0005324]; long-chain fatty acid-CoA ligase activity [GO:0004467]; very long-chain fatty acid-CoA ligase activity [GO:0031957]; fatty acid biosynthetic process [GO:0006633]; long-chai…	long-chain fatty acid-CoA ligase activity [GO:0004467]; long-chain fatty acid transporter activity [GO:0005324]; very long-chain fatty acid-CoA ligase activity [GO:0031957]	GO:0000038; GO:0004467; GO:0005324; GO:0005777; GO:0005783; GO:0005811; GO:0006515; GO:0006633; GO:0031235; GO:0031957; GO:0044539
				2	8093646	8095074	MGG_08256		protein_coding	Mitochondrial peroxiredoxin PRX1 [Source:UniProtKB/TrEMBL%3BAcc:G4MXC5]	broad_genes	G4MXC5	G4MXC5_MAGO7	unreviewed	Mitochondrial peroxiredoxin PRX1	MGG_08256	Magnaporthe oryzae (strain 70-15 / ATCC MYA-4617 / FGSC 8958) (Rice blast fungus) (Pyricularia oryzae)	224			peroxidase activity [GO:0004601]; peroxiredoxin activity [GO:0051920]	peroxidase activity [GO:0004601]; peroxiredoxin activity [GO:0051920]	GO:0004601; GO:0051920
				2	8098419	8101628	MGG_08255		protein_coding	Putative uncharacterized protein [Source:UniProtKB/TrEMBL%3BAcc:G4MXC6]	broad_genes	G4MXC6	G4MXC6_MAGO7	unreviewed	Uncharacterized protein	MGG_08255	Magnaporthe oryzae (strain 70-15 / ATCC MYA-4617 / FGSC 8958) (Rice blast fungus) (Pyricularia oryzae)	1069
				2	8102359	8103386	MGG_08254		protein_coding	Putative uncharacterized protein [Source:UniProtKB/TrEMBL%3BAcc:G4MXC7]	broad_genes	G4MXC7	G4MXC7_MAGO7	unreviewed	Uncharacterized protein	MGG_08254	Magnaporthe oryzae (strain 70-15 / ATCC MYA-4617 / FGSC 8958) (Rice blast fungus) (Pyricularia oryzae)	229		extracellular region [GO:0005576]	extracellular region [GO:0005576]		GO:0005576
				2	8103281	8104499	MGG_08253		protein_coding	Putative uncharacterized protein [Source:UniProtKB/TrEMBL%3BAcc:G4MXT6]	broad_genes	G4MXT6	G4MXT6_MAGO7	unreviewed	Uncharacterized protein	MGG_08253	Magnaporthe oryzae (strain 70-15 / ATCC MYA-4617 / FGSC 8958) (Rice blast fungus) (Pyricularia oryzae)	154
				2	8104785	8106881	MGG_08252		protein_coding	Putative uncharacterized protein [Source:UniProtKB/TrEMBL%3BAcc:G4MXT7]	broad_genes	G4MXT7	G4MXT7_MAGO7	unreviewed	Na_H_Exchanger domain-containing protein	MGG_08252	Magnaporthe oryzae (strain 70-15 / ATCC MYA-4617 / FGSC 8958) (Rice blast fungus) (Pyricularia oryzae)	581		integral component of membrane [GO:0016021]	integral component of membrane [GO:0016021]; solute:proton antiporter activity [GO:0015299]	solute:proton antiporter activity [GO:0015299]	GO:0015299; GO:0016021
				2	8106792	8107241	MGG_15106		protein_coding	Putative uncharacterized protein [Source:UniProtKB/TrEMBL%3BAcc:G4MXT8]	broad_genes	G4MXT8	G4MXT8_MAGO7	unreviewed	Uncharacterized protein	MGG_15106	Magnaporthe oryzae (strain 70-15 / ATCC MYA-4617 / FGSC 8958) (Rice blast fungus) (Pyricularia oryzae)	149
				2	8107779	8108570	MGG_15961		protein_coding	Putative uncharacterized protein [Source:UniProtKB/TrEMBL%3BAcc:G4MXT9]	broad_genes	G4MXT9	G4MXT9_MAGO7	unreviewed	Fn3_like domain-containing protein	MGG_15961	Magnaporthe oryzae (strain 70-15 / ATCC MYA-4617 / FGSC 8958) (Rice blast fungus) (Pyricularia oryzae)	263	carbohydrate metabolic process [GO:0005975]		hydrolase activity, hydrolyzing O-glycosyl compounds [GO:0004553]; carbohydrate metabolic process [GO:0005975]	hydrolase activity, hydrolyzing O-glycosyl compounds [GO:0004553]	GO:0004553; GO:0005975
				2	8114581	8115231	MGG_15962		pseudogene		broad_genes
				2	8115515	8116338	MGG_15963		protein_coding	Putative uncharacterized protein [Source:UniProtKB/TrEMBL%3BAcc:G4MXU1]	broad_genes	G4MXU1	G4MXU1_MAGO7	unreviewed	Uncharacterized protein	MGG_15963	Magnaporthe oryzae (strain 70-15 / ATCC MYA-4617 / FGSC 8958) (Rice blast fungus) (Pyricularia oryzae)	242
				2	8118221	8118292	EFMOG00000000241	tRNA-Pseudo	tRNA_pseudogene	tRNA-Pseudo for anticodon GUU [Source:TRNASCAN_SE%3BAcc:tRNA-Pseudo]	ncrna_eg	tRNA-Pseudo
				2	8118255	8119211	MGG_12488		protein_coding	Putative uncharacterized protein [Source:UniProtKB/TrEMBL%3BAcc:G5EHX2]	broad_genes	G5EHX2	G5EHX2_MAGO7	unreviewed	Uncharacterized protein	MGG_08246 MGG_12488	Magnaporthe oryzae (strain 70-15 / ATCC MYA-4617 / FGSC 8958) (Rice blast fungus) (Pyricularia oryzae)	219
				2	8121703	8122359	MGG_15964		protein_coding	Putative uncharacterized protein [Source:UniProtKB/TrEMBL%3BAcc:G4MXU3]	broad_genes	G4MXU3	G4MXU3_MAGO7	unreviewed	Uncharacterized protein	MGG_15964	Magnaporthe oryzae (strain 70-15 / ATCC MYA-4617 / FGSC 8958) (Rice blast fungus) (Pyricularia oryzae)	82		integral component of membrane [GO:0016021]	integral component of membrane [GO:0016021]		GO:0016021
				2	8127791	8128785	MGG_08246		protein_coding	Putative uncharacterized protein [Source:UniProtKB/TrEMBL%3BAcc:G5EHX2]	broad_genes	G5EHX2	G5EHX2_MAGO7	unreviewed	Uncharacterized protein	MGG_08246 MGG_12488	Magnaporthe oryzae (strain 70-15 / ATCC MYA-4617 / FGSC 8958) (Rice blast fungus) (Pyricularia oryzae)	219
				2	8128710	8128781	EFMOG00000000093	tRNA-Pseudo	tRNA_pseudogene	tRNA-Pseudo for anticodon GUU [Source:TRNASCAN_SE%3BAcc:tRNA-Pseudo]	ncrna_eg	tRNA-Pseudo
				2	8139781	8141493	MGG_15965		protein_coding	Putative uncharacterized protein [Source:UniProtKB/TrEMBL%3BAcc:G4MXU5]	broad_genes	G4MXU5	G4MXU5_MAGO7	unreviewed	Uncharacterized protein	MGG_15965	Magnaporthe oryzae (strain 70-15 / ATCC MYA-4617 / FGSC 8958) (Rice blast fungus) (Pyricularia oryzae)	570
				2	8146753	8148407	MGG_12489		protein_coding	Beta-xylosidase [Source:UniProtKB/TrEMBL%3BAcc:G4MXU6]	broad_genes	G4MXU6	G4MXU6_MAGO7	unreviewed	Beta-xylosidase	MGG_12489	Magnaporthe oryzae (strain 70-15 / ATCC MYA-4617 / FGSC 8958) (Rice blast fungus) (Pyricularia oryzae)	517	polysaccharide catabolic process [GO:0000272]		hydrolase activity, hydrolyzing O-glycosyl compounds [GO:0004553]; polysaccharide catabolic process [GO:0000272]	hydrolase activity, hydrolyzing O-glycosyl compounds [GO:0004553]	GO:0000272; GO:0004553
				2	8151358	8151859	MGG_15966		protein_coding	Putative uncharacterized protein [Source:UniProtKB/TrEMBL%3BAcc:G4MXU7]	broad_genes	G4MXU7	G4MXU7_MAGO7	unreviewed	Uncharacterized protein	MGG_15966	Magnaporthe oryzae (strain 70-15 / ATCC MYA-4617 / FGSC 8958) (Rice blast fungus) (Pyricularia oryzae)	89
				2	8152109	8153443	MGG_08239		protein_coding	Putative uncharacterized protein [Source:UniProtKB/TrEMBL%3BAcc:G4MXU8]	broad_genes	G4MXU8	G4MXU8_MAGO7	unreviewed	CCHC-type domain-containing protein	MGG_08239	Magnaporthe oryzae (strain 70-15 / ATCC MYA-4617 / FGSC 8958) (Rice blast fungus) (Pyricularia oryzae)	411			nucleic acid binding [GO:0003676]; zinc ion binding [GO:0008270]	nucleic acid binding [GO:0003676]; zinc ion binding [GO:0008270]	GO:0003676; GO:0008270
				2	8154510	8155197	MGG_12491		protein_coding	Putative uncharacterized protein [Source:UniProtKB/TrEMBL%3BAcc:G4MXU9]	broad_genes	G4MXU9	G4MXU9_MAGO7	unreviewed	Uncharacterized protein	MGG_12491	Magnaporthe oryzae (strain 70-15 / ATCC MYA-4617 / FGSC 8958) (Rice blast fungus) (Pyricularia oryzae)	114
				2	8155727	8157313	MGG_12492		protein_coding	Putative uncharacterized protein [Source:UniProtKB/TrEMBL%3BAcc:G4MXV0]	broad_genes	G4MXV0	G4MXV0_MAGO7	unreviewed	Uncharacterized protein	MGG_12492	Magnaporthe oryzae (strain 70-15 / ATCC MYA-4617 / FGSC 8958) (Rice blast fungus) (Pyricularia oryzae)	398
				2	8164957	8172952	MGG_08236		protein_coding	Polyketide synthase [Source:UniProtKB/TrEMBL%3BAcc:G4MXV1]	broad_genes	G4MXV1	G4MXV1_MAGO7	unreviewed	Polyketide synthase	MGG_08236	Magnaporthe oryzae (strain 70-15 / ATCC MYA-4617 / FGSC 8958) (Rice blast fungus) (Pyricularia oryzae)	2616	fatty acid biosynthetic process [GO:0006633]; methylation [GO:0032259]		3-oxoacyl-[acyl-carrier-protein] synthase activity [GO:0004315]; methyltransferase activity [GO:0008168]; oxidoreductase activity [GO:0016491]; phosphopantetheine binding [GO:0031177]; zinc ion binding [GO:0008270]; fatty acid biosynthetic process [GO:0006633]; methylation [GO:0032259]	3-oxoacyl-[acyl-carrier-protein] synthase activity [GO:0004315]; methyltransferase activity [GO:0008168]; oxidoreductase activity [GO:0016491]; phosphopantetheine binding [GO:0031177]; zinc ion binding [GO:0008270]	GO:0004315; GO:0006633; GO:0008168; GO:0008270; GO:0016491; GO:0031177; GO:0032259
				2	8173944	8174733	MGG_15107		protein_coding	Putative uncharacterized protein [Source:UniProtKB/TrEMBL%3BAcc:G4MXV2]	broad_genes	G4MXV2	G4MXV2_MAGO7	unreviewed	Uncharacterized protein	MGG_15107	Magnaporthe oryzae (strain 70-15 / ATCC MYA-4617 / FGSC 8958) (Rice blast fungus) (Pyricularia oryzae)	183
				2	8175397	8177395	MGG_15108		protein_coding	Putative uncharacterized protein [Source:UniProtKB/TrEMBL%3BAcc:G4MXV3]	broad_genes	G4MXV3	G4MXV3_MAGO7	unreviewed	Uncharacterized protein	MGG_15108	Magnaporthe oryzae (strain 70-15 / ATCC MYA-4617 / FGSC 8958) (Rice blast fungus) (Pyricularia oryzae)	581			CoA-transferase activity [GO:0008410]	CoA-transferase activity [GO:0008410]	GO:0008410
				2	8177788	8179591	MGG_12496		protein_coding	Cytochrome P450 52A2 [Source:UniProtKB/TrEMBL%3BAcc:G4MXV4]	broad_genes	G4MXV4	G4MXV4_MAGO7	unreviewed	Cytochrome P450 52A2	MGG_12496	Magnaporthe oryzae (strain 70-15 / ATCC MYA-4617 / FGSC 8958) (Rice blast fungus) (Pyricularia oryzae)	511			heme binding [GO:0020037]; iron ion binding [GO:0005506]; monooxygenase activity [GO:0004497]; oxidoreductase activity, acting on paired donors, with incorporation or reduction of molecular oxygen [GO:0016705]	heme binding [GO:0020037]; iron ion binding [GO:0005506]; monooxygenase activity [GO:0004497]; oxidoreductase activity, acting on paired donors, with incorporation or reduction of molecular oxygen [GO:0016705]	GO:0004497; GO:0005506; GO:0016705; GO:0020037
				2	8179926	8181685	MGG_12497		protein_coding	Putative uncharacterized protein [Source:UniProtKB/TrEMBL%3BAcc:G4MXV5]	broad_genes	G4MXV5	G4MXV5_MAGO7	unreviewed	Uncharacterized protein	MGG_12497	Magnaporthe oryzae (strain 70-15 / ATCC MYA-4617 / FGSC 8958) (Rice blast fungus) (Pyricularia oryzae)	565			heme binding [GO:0020037]; iron ion binding [GO:0005506]; monooxygenase activity [GO:0004497]; oxidoreductase activity, acting on paired donors, with incorporation or reduction of molecular oxygen [GO:0016705]	heme binding [GO:0020037]; iron ion binding [GO:0005506]; monooxygenase activity [GO:0004497]; oxidoreductase activity, acting on paired donors, with incorporation or reduction of molecular oxygen [GO:0016705]	GO:0004497; GO:0005506; GO:0016705; GO:0020037
				2	8182613	8183412	MGG_15967		pseudogene		broad_genes
18	IRBLk-KA_6_1316128	6	1316128	6	1265784	1266427	MGG_17642		protein_coding	Putative uncharacterized protein [Source:UniProtKB/TrEMBL%3BAcc:G4NGJ4]	broad_genes	G4NGJ4	G4NGJ4_MAGO7	unreviewed	Uncharacterized protein	MGG_17642	Magnaporthe oryzae (strain 70-15 / ATCC MYA-4617 / FGSC 8958) (Rice blast fungus) (Pyricularia oryzae)	164
				6	1266921	1267286	MGG_04291		protein_coding	Putative uncharacterized protein [Source:UniProtKB/TrEMBL%3BAcc:G4NGJ5]	broad_genes	G4NGJ5	G4NGJ5_MAGO7	unreviewed	Uncharacterized protein	MGG_04291	Magnaporthe oryzae (strain 70-15 / ATCC MYA-4617 / FGSC 8958) (Rice blast fungus) (Pyricularia oryzae)	121
				6	1267900	1268646	MGG_17643		pseudogene		broad_genes
				6	1271153	1273135	MGG_17644		protein_coding	Putative uncharacterized protein [Source:UniProtKB/TrEMBL%3BAcc:G4NGJ7]	broad_genes	G4NGJ7	G4NGJ7_MAGO7	unreviewed	Uncharacterized protein	MGG_17644	Magnaporthe oryzae (strain 70-15 / ATCC MYA-4617 / FGSC 8958) (Rice blast fungus) (Pyricularia oryzae)	443
				6	1273828	1275442	MGG_04289		protein_coding	Dynamin GTPase [Source:UniProtKB/TrEMBL%3BAcc:G4NGJ9]	broad_genes	G4NGJ9	G4NGJ9_MAGO7	unreviewed	Dynamin GTPase	MGG_04289	Magnaporthe oryzae (strain 70-15 / ATCC MYA-4617 / FGSC 8958) (Rice blast fungus) (Pyricularia oryzae)	520			GTP binding [GO:0005525]; GTPase activity [GO:0003924]	GTPase activity [GO:0003924]; GTP binding [GO:0005525]	GO:0003924; GO:0005525
				6	1278603	1280848	MGG_12198		protein_coding	Putative uncharacterized protein [Source:UniProtKB/TrEMBL%3BAcc:G4NGK0]	broad_genes	G4NGK0	G4NGK0_MAGO7	unreviewed	Uncharacterized protein	MGG_12198	Magnaporthe oryzae (strain 70-15 / ATCC MYA-4617 / FGSC 8958) (Rice blast fungus) (Pyricularia oryzae)	524
				6	1286699	1286770	EFMOG00000000317	tRNA-Pseudo	tRNA_pseudogene	tRNA-Pseudo for anticodon GUU [Source:TRNASCAN_SE%3BAcc:tRNA-Pseudo]	ncrna_eg	tRNA-Pseudo
				6	1286742	1287722	MGG_17645		protein_coding	Putative uncharacterized protein [Source:UniProtKB/TrEMBL%3BAcc:G4NGJ8]	broad_genes	G4NGJ8	G4NGJ8_MAGO7	unreviewed	Uncharacterized protein	MGG_17645	Magnaporthe oryzae (strain 70-15 / ATCC MYA-4617 / FGSC 8958) (Rice blast fungus) (Pyricularia oryzae)	161
				6	1291940	1293705	MGG_12203		protein_coding	Putative uncharacterized protein [Source:UniProtKB/TrEMBL%3BAcc:G4NFD0]	broad_genes	G4NFD0	G4NFD0_MAGO7	unreviewed	Uncharacterized protein	MGG_12203	Magnaporthe oryzae (strain 70-15 / ATCC MYA-4617 / FGSC 8958) (Rice blast fungus) (Pyricularia oryzae)	376		integral component of membrane [GO:0016021]	integral component of membrane [GO:0016021]		GO:0016021
				6	1297705	1298563	MGG_04282		protein_coding	Putative uncharacterized protein [Source:UniProtKB/TrEMBL%3BAcc:G4NFD1]	broad_genes	G4NFD1	G4NFD1_MAGO7	unreviewed	BTB domain-containing protein	MGG_04282	Magnaporthe oryzae (strain 70-15 / ATCC MYA-4617 / FGSC 8958) (Rice blast fungus) (Pyricularia oryzae)	230
				6	1299790	1301251	MGG_17646		protein_coding	Putative uncharacterized protein [Source:UniProtKB/TrEMBL%3BAcc:G4NFD2]	broad_genes	G4NFD2	G4NFD2_MAGO7	unreviewed	Uncharacterized protein	MGG_17646	Magnaporthe oryzae (strain 70-15 / ATCC MYA-4617 / FGSC 8958) (Rice blast fungus) (Pyricularia oryzae)	318		integral component of membrane [GO:0016021]	integral component of membrane [GO:0016021]		GO:0016021
				6	1302643	1302960	MGG_17647		protein_coding	Putative uncharacterized protein [Source:UniProtKB/TrEMBL%3BAcc:G4NFD3]	broad_genes	G4NFD3	G4NFD3_MAGO7	unreviewed	Uncharacterized protein	MGG_17647	Magnaporthe oryzae (strain 70-15 / ATCC MYA-4617 / FGSC 8958) (Rice blast fungus) (Pyricularia oryzae)	71
				6	1306997	1308109	MGG_04278		protein_coding	Putative uncharacterized protein [Source:UniProtKB/TrEMBL%3BAcc:G4NFD4]	broad_genes	G4NFD4	G4NFD4_MAGO7	unreviewed	Arylamine N-acetyltransferase (EC 2.3.1.5)	MGG_04278	Magnaporthe oryzae (strain 70-15 / ATCC MYA-4617 / FGSC 8958) (Rice blast fungus) (Pyricularia oryzae)	370			arylamine N-acetyltransferase activity [GO:0004060]	arylamine N-acetyltransferase activity [GO:0004060]	GO:0004060
				6	1313639	1315420	MGG_17648		protein_coding	Putative uncharacterized protein [Source:UniProtKB/TrEMBL%3BAcc:G4NFD5]	broad_genes	G4NFD5	G4NFD5_MAGO7	unreviewed	Uncharacterized protein	MGG_17648	Magnaporthe oryzae (strain 70-15 / ATCC MYA-4617 / FGSC 8958) (Rice blast fungus) (Pyricularia oryzae)	378
				6	1316422	1317083	MGG_17649		protein_coding	Putative uncharacterized protein [Source:UniProtKB/TrEMBL%3BAcc:G4NFD6]	broad_genes	G4NFD6	G4NFD6_MAGO7	unreviewed	Uncharacterized protein	MGG_17649	Magnaporthe oryzae (strain 70-15 / ATCC MYA-4617 / FGSC 8958) (Rice blast fungus) (Pyricularia oryzae)	194
				6	1318327	1318735	MGG_17650		protein_coding	Putative uncharacterized protein [Source:UniProtKB/TrEMBL%3BAcc:G4NBK1]	broad_genes	G4NBK1	G4NBK1_MAGO7	unreviewed	Uncharacterized protein	MGG_17295 MGG_17650	Magnaporthe oryzae (strain 70-15 / ATCC MYA-4617 / FGSC 8958) (Rice blast fungus) (Pyricularia oryzae)	54
				6	1320157	1320738	MGG_17651		protein_coding	Putative uncharacterized protein [Source:UniProtKB/TrEMBL%3BAcc:G4NFD8]	broad_genes	G4NFD8	G4NFD8_MAGO7	unreviewed	Uncharacterized protein	MGG_17651	Magnaporthe oryzae (strain 70-15 / ATCC MYA-4617 / FGSC 8958) (Rice blast fungus) (Pyricularia oryzae)	125			heme binding [GO:0020037]; iron ion binding [GO:0005506]; monooxygenase activity [GO:0004497]; oxidoreductase activity, acting on paired donors, with incorporation or reduction of molecular oxygen [GO:0016705]	heme binding [GO:0020037]; iron ion binding [GO:0005506]; monooxygenase activity [GO:0004497]; oxidoreductase activity, acting on paired donors, with incorporation or reduction of molecular oxygen [GO:0016705]	GO:0004497; GO:0005506; GO:0016705; GO:0020037
				6	1321498	1323351	MGG_17652		protein_coding	Putative uncharacterized protein [Source:UniProtKB/TrEMBL%3BAcc:G4NFD9]	broad_genes	G4NFD9	G4NFD9_MAGO7	unreviewed	CCHC-type domain-containing protein	MGG_17652	Magnaporthe oryzae (strain 70-15 / ATCC MYA-4617 / FGSC 8958) (Rice blast fungus) (Pyricularia oryzae)	457			nucleic acid binding [GO:0003676]; zinc ion binding [GO:0008270]	nucleic acid binding [GO:0003676]; zinc ion binding [GO:0008270]	GO:0003676; GO:0008270
				6	1331785	1333830	MGG_14477		protein_coding	Choline dehydrogenase [Source:UniProtKB/TrEMBL%3BAcc:G4NFE0]	broad_genes	G4NFE0	G4NFE0_MAGO7	unreviewed	Choline dehydrogenase	MGG_14477	Magnaporthe oryzae (strain 70-15 / ATCC MYA-4617 / FGSC 8958) (Rice blast fungus) (Pyricularia oryzae)	550			flavin adenine dinucleotide binding [GO:0050660]; oxidoreductase activity, acting on CH-OH group of donors [GO:0016614]	flavin adenine dinucleotide binding [GO:0050660]; oxidoreductase activity, acting on CH-OH group of donors [GO:0016614]	GO:0016614; GO:0050660
				6	1334103	1336587	MGG_14957		protein_coding	Putative uncharacterized protein [Source:UniProtKB/TrEMBL%3BAcc:G4NFE1]	broad_genes	G4NFE1	G4NFE1_MAGO7	unreviewed	Uncharacterized protein	MGG_14957	Magnaporthe oryzae (strain 70-15 / ATCC MYA-4617 / FGSC 8958) (Rice blast fungus) (Pyricularia oryzae)	764
				6	1336945	1337485	MGG_17653		protein_coding	Putative uncharacterized protein [Source:UniProtKB/TrEMBL%3BAcc:G4NFE2]	broad_genes	G4NFE2	G4NFE2_MAGO7	unreviewed	Uncharacterized protein	MGG_17653	Magnaporthe oryzae (strain 70-15 / ATCC MYA-4617 / FGSC 8958) (Rice blast fungus) (Pyricularia oryzae)	104
				6	1338269	1339852	MGG_17654		protein_coding	Putative uncharacterized protein [Source:UniProtKB/TrEMBL%3BAcc:G4NFE3]	broad_genes	G4NFE3	G4NFE3_MAGO7	unreviewed	CCHC-type domain-containing protein	MGG_17654	Magnaporthe oryzae (strain 70-15 / ATCC MYA-4617 / FGSC 8958) (Rice blast fungus) (Pyricularia oryzae)	355			nucleic acid binding [GO:0003676]; zinc ion binding [GO:0008270]	nucleic acid binding [GO:0003676]; zinc ion binding [GO:0008270]	GO:0003676; GO:0008270
				6	1343327	1344395	MGG_17655		protein_coding	Putative uncharacterized protein [Source:UniProtKB/TrEMBL%3BAcc:G4NFE4]	broad_genes	G4NFE4	G4NFE4_MAGO7	unreviewed	Uncharacterized protein	MGG_17655	Magnaporthe oryzae (strain 70-15 / ATCC MYA-4617 / FGSC 8958) (Rice blast fungus) (Pyricularia oryzae)	199
				6	1344967	1345457	MGG_14438		protein_coding	Putative uncharacterized protein [Source:UniProtKB/TrEMBL%3BAcc:G4NFE5]	broad_genes	G4NFE5	G4NFE5_MAGO7	unreviewed	Uncharacterized protein	MGG_14438	Magnaporthe oryzae (strain 70-15 / ATCC MYA-4617 / FGSC 8958) (Rice blast fungus) (Pyricularia oryzae)	146
				6	1350185	1350920	MGG_04272		protein_coding	Putative uncharacterized protein [Source:UniProtKB/TrEMBL%3BAcc:G4NFE6]	broad_genes	G4NFE6	G4NFE6_MAGO7	unreviewed	Uncharacterized protein	MGG_04272	Magnaporthe oryzae (strain 70-15 / ATCC MYA-4617 / FGSC 8958) (Rice blast fungus) (Pyricularia oryzae)	192
				6	1351608	1352152	MGG_04271		protein_coding	Putative uncharacterized protein [Source:UniProtKB/TrEMBL%3BAcc:G4NFE7]	broad_genes	G4NFE7	G4NFE7_MAGO7	unreviewed	Uncharacterized protein	MGG_04271	Magnaporthe oryzae (strain 70-15 / ATCC MYA-4617 / FGSC 8958) (Rice blast fungus) (Pyricularia oryzae)	162
				6	1356669	1357555	MGG_17656		protein_coding	Putative uncharacterized protein [Source:UniProtKB/TrEMBL%3BAcc:G4NFE8]	broad_genes	G4NFE8	G4NFE8_MAGO7	unreviewed	Uncharacterized protein	MGG_17656	Magnaporthe oryzae (strain 70-15 / ATCC MYA-4617 / FGSC 8958) (Rice blast fungus) (Pyricularia oryzae)	205
				6	1358303	1359002	MGG_17657		protein_coding	Putative uncharacterized protein [Source:UniProtKB/TrEMBL%3BAcc:G4NFE9]	broad_genes	G4NFE9	G4NFE9_MAGO7	unreviewed	Uncharacterized protein	MGG_17657	Magnaporthe oryzae (strain 70-15 / ATCC MYA-4617 / FGSC 8958) (Rice blast fungus) (Pyricularia oryzae)	137
				6	1359083	1359490	MGG_14958		protein_coding	Putative uncharacterized protein [Source:UniProtKB/TrEMBL%3BAcc:G4NFF0]	broad_genes	G4NFF0	G4NFF0_MAGO7	unreviewed	Uncharacterized protein	MGG_14958	Magnaporthe oryzae (strain 70-15 / ATCC MYA-4617 / FGSC 8958) (Rice blast fungus) (Pyricularia oryzae)	116
				6	1365469	1367061	MGG_17658		protein_coding	Putative uncharacterized protein [Source:UniProtKB/TrEMBL%3BAcc:G4NFF1]	broad_genes	G4NFF1	G4NFF1_MAGO7	unreviewed	Ankyrin_rpt-contain_dom domain-containing protein	MGG_17658	Magnaporthe oryzae (strain 70-15 / ATCC MYA-4617 / FGSC 8958) (Rice blast fungus) (Pyricularia oryzae)	493
19	IRBLz5-CA_1_1250754	1	1250754	1	1205730	1207693	MGG_16081		protein_coding	Putative uncharacterized protein [Source:UniProtKB/TrEMBL%3BAcc:G4MQ29]	broad_genes	G4MQ29	G4MQ29_MAGO7	unreviewed	Uncharacterized protein	MGG_16081	Magnaporthe oryzae (strain 70-15 / ATCC MYA-4617 / FGSC 8958) (Rice blast fungus) (Pyricularia oryzae)	284
				1	1207814	1209457	MGG_02267		protein_coding	Putative uncharacterized protein [Source:UniProtKB/TrEMBL%3BAcc:G4MQ30]	broad_genes	G4MQ30	G4MQ30_MAGO7	unreviewed	Uncharacterized protein	MGG_02267	Magnaporthe oryzae (strain 70-15 / ATCC MYA-4617 / FGSC 8958) (Rice blast fungus) (Pyricularia oryzae)	370		integral component of membrane [GO:0016021]	integral component of membrane [GO:0016021]		GO:0016021
				1	1209989	1211926	MGG_02268		protein_coding	Putative uncharacterized protein [Source:UniProtKB/TrEMBL%3BAcc:G4MQ31]	broad_genes	G4MQ31	G4MQ31_MAGO7	unreviewed	Uncharacterized protein	MGG_02268	Magnaporthe oryzae (strain 70-15 / ATCC MYA-4617 / FGSC 8958) (Rice blast fungus) (Pyricularia oryzae)	516	protein glycosylation [GO:0006486]		glycosyltransferase activity [GO:0016757]; protein glycosylation [GO:0006486]	glycosyltransferase activity [GO:0016757]	GO:0006486; GO:0016757
				1	1212487	1214111	MGG_02269		protein_coding	Putative uncharacterized protein [Source:UniProtKB/TrEMBL%3BAcc:G4MQ32]	broad_genes	G4MQ32	G4MQ32_MAGO7	unreviewed	Uncharacterized protein	MGG_02269	Magnaporthe oryzae (strain 70-15 / ATCC MYA-4617 / FGSC 8958) (Rice blast fungus) (Pyricularia oryzae)	377
				1	1214875	1215537	MGG_02270		protein_coding	Putative uncharacterized protein [Source:UniProtKB/TrEMBL%3BAcc:G4MQ33]	broad_genes	G4MQ33	G4MQ33_MAGO7	unreviewed	Uncharacterized protein	MGG_02270	Magnaporthe oryzae (strain 70-15 / ATCC MYA-4617 / FGSC 8958) (Rice blast fungus) (Pyricularia oryzae)	142
				1	1219319	1221222	MGG_14593		protein_coding	Putative uncharacterized protein [Source:UniProtKB/TrEMBL%3BAcc:G4MQ34]	broad_genes	G4MQ34	G4MQ34_MAGO7	unreviewed	Uncharacterized protein	MGG_14593	Magnaporthe oryzae (strain 70-15 / ATCC MYA-4617 / FGSC 8958) (Rice blast fungus) (Pyricularia oryzae)	312
				1	1223228	1224871	MGG_02272		protein_coding	Ent-kaurene oxidase [Source:UniProtKB/TrEMBL%3BAcc:G4MQ35]	broad_genes	G4MQ35	G4MQ35_MAGO7	unreviewed	Ent-kaurene oxidase	MGG_02272	Magnaporthe oryzae (strain 70-15 / ATCC MYA-4617 / FGSC 8958) (Rice blast fungus) (Pyricularia oryzae)	526		integral component of membrane [GO:0016021]	integral component of membrane [GO:0016021]; heme binding [GO:0020037]; iron ion binding [GO:0005506]; monooxygenase activity [GO:0004497]; oxidoreductase activity, acting on paired donors, with incorporation or reduction of molecular oxygen [GO:0016705]	heme binding [GO:0020037]; iron ion binding [GO:0005506]; monooxygenase activity [GO:0004497]; oxidoreductase activity, acting on paired donors, with incorporation or reduction of molecular oxygen [GO:0016705]	GO:0004497; GO:0005506; GO:0016021; GO:0016705; GO:0020037
				1	1225925	1226720	MGG_02273		protein_coding	Putative uncharacterized protein [Source:UniProtKB/TrEMBL%3BAcc:G4MQ36]	broad_genes	G4MQ36	G4MQ36_MAGO7	unreviewed	Uncharacterized protein	MGG_02273	Magnaporthe oryzae (strain 70-15 / ATCC MYA-4617 / FGSC 8958) (Rice blast fungus) (Pyricularia oryzae)	186
				1	1229104	1230049	MGG_02274		protein_coding	Putative uncharacterized protein [Source:UniProtKB/TrEMBL%3BAcc:G4MQ37]	broad_genes	G4MQ37	G4MQ37_MAGO7	unreviewed	Uncharacterized protein	MGG_02274	Magnaporthe oryzae (strain 70-15 / ATCC MYA-4617 / FGSC 8958) (Rice blast fungus) (Pyricularia oryzae)	289
				1	1230293	1232144	MGG_02275		protein_coding	Endoprotease [Source:UniProtKB/TrEMBL%3BAcc:G4MQ38]	broad_genes	G4MQ38	G4MQ38_MAGO7	unreviewed	Endoprotease	MGG_02275	Magnaporthe oryzae (strain 70-15 / ATCC MYA-4617 / FGSC 8958) (Rice blast fungus) (Pyricularia oryzae)	529			serine-type peptidase activity [GO:0008236]	serine-type peptidase activity [GO:0008236]	GO:0008236
				1	1236941	1237566	MGG_16082		pseudogene		broad_genes
				1	1238666	1239594	MGG_16083		protein_coding	Putative uncharacterized protein [Source:UniProtKB/TrEMBL%3BAcc:G4MQ40]	broad_genes	G4MQ40	G4MQ40_MAGO7	unreviewed	Autophagy-related protein	MGG_16083	Magnaporthe oryzae (strain 70-15 / ATCC MYA-4617 / FGSC 8958) (Rice blast fungus) (Pyricularia oryzae)	86	amino acid transport [GO:0006865]; autophagy [GO:0006914]	integral component of membrane [GO:0016021]; vacuolar membrane [GO:0005774]	integral component of membrane [GO:0016021]; vacuolar membrane [GO:0005774]; amino acid transport [GO:0006865]; autophagy [GO:0006914]		GO:0005774; GO:0006865; GO:0006914; GO:0016021
				1	1240289	1240777	MGG_16084		protein_coding	Putative uncharacterized protein [Source:UniProtKB/TrEMBL%3BAcc:G4MQ41]	broad_genes	G4MQ41	G4MQ41_MAGO7	unreviewed	Uncharacterized protein	MGG_16084	Magnaporthe oryzae (strain 70-15 / ATCC MYA-4617 / FGSC 8958) (Rice blast fungus) (Pyricularia oryzae)	162
				1	1254528	1255104	MGG_16085		protein_coding	Putative uncharacterized protein [Source:UniProtKB/TrEMBL%3BAcc:G4MQ42]	broad_genes	G4MQ42	G4MQ42_MAGO7	unreviewed	Uncharacterized protein	MGG_16085	Magnaporthe oryzae (strain 70-15 / ATCC MYA-4617 / FGSC 8958) (Rice blast fungus) (Pyricularia oryzae)	75
				1	1256932	1257387	MGG_02283		protein_coding	Putative uncharacterized protein [Source:UniProtKB/TrEMBL%3BAcc:G4MQ43]	broad_genes	G4MQ43	G4MQ43_MAGO7	unreviewed	Copper transporter	MGG_02283	Magnaporthe oryzae (strain 70-15 / ATCC MYA-4617 / FGSC 8958) (Rice blast fungus) (Pyricularia oryzae)	151	cellular copper ion homeostasis [GO:0006878]	integral component of membrane [GO:0016021]	integral component of membrane [GO:0016021]; copper ion transmembrane transporter activity [GO:0005375]; cellular copper ion homeostasis [GO:0006878]	copper ion transmembrane transporter activity [GO:0005375]	GO:0005375; GO:0006878; GO:0016021
				1	1258713	1260105	MGG_02284		protein_coding	Putative uncharacterized protein [Source:UniProtKB/TrEMBL%3BAcc:G4MQ44]	broad_genes	G4MQ44	G4MQ44_MAGO7	unreviewed	Uncharacterized protein	MGG_02284	Magnaporthe oryzae (strain 70-15 / ATCC MYA-4617 / FGSC 8958) (Rice blast fungus) (Pyricularia oryzae)	410
				1	1260130	1260648	MGG_14592		protein_coding	Putative uncharacterized protein [Source:UniProtKB/TrEMBL%3BAcc:G4MQ45]	broad_genes	G4MQ45	G4MQ45_MAGO7	unreviewed	Uncharacterized protein	MGG_14592	Magnaporthe oryzae (strain 70-15 / ATCC MYA-4617 / FGSC 8958) (Rice blast fungus) (Pyricularia oryzae)	146
				1	1263621	1264016	MGG_02285		protein_coding	Putative uncharacterized protein [Source:UniProtKB/TrEMBL%3BAcc:G4MQ46]	broad_genes	G4MQ46	G4MQ46_MAGO7	unreviewed	Uncharacterized protein	MGG_02285	Magnaporthe oryzae (strain 70-15 / ATCC MYA-4617 / FGSC 8958) (Rice blast fungus) (Pyricularia oryzae)	131			catalytic activity [GO:0003824]	catalytic activity [GO:0003824]	GO:0003824
				1	1269500	1270905	MGG_02287		protein_coding	O-methyltransferase [Source:UniProtKB/TrEMBL%3BAcc:G4MQ47]	broad_genes	G4MQ47	G4MQ47_MAGO7	unreviewed	O-methyltransferase	MGG_02287	Magnaporthe oryzae (strain 70-15 / ATCC MYA-4617 / FGSC 8958) (Rice blast fungus) (Pyricularia oryzae)	445	methylation [GO:0032259]		O-methyltransferase activity [GO:0008171]; methylation [GO:0032259]	O-methyltransferase activity [GO:0008171]	GO:0008171; GO:0032259
				1	1273078	1273979	MGG_02288		protein_coding	Putative uncharacterized protein [Source:UniProtKB/TrEMBL%3BAcc:G4MQ48]	broad_genes	G4MQ48	G4MQ48_MAGO7	unreviewed	Uncharacterized protein	MGG_02288	Magnaporthe oryzae (strain 70-15 / ATCC MYA-4617 / FGSC 8958) (Rice blast fungus) (Pyricularia oryzae)	219		integral component of membrane [GO:0016021]	integral component of membrane [GO:0016021]		GO:0016021
				1	1273972	1275873	MGG_02289		protein_coding	Putative uncharacterized protein [Source:UniProtKB/TrEMBL%3BAcc:G4MQ49]	broad_genes	G4MQ49	G4MQ49_MAGO7	unreviewed	Zn(2)-C6 fungal-type domain-containing protein	MGG_02289	Magnaporthe oryzae (strain 70-15 / ATCC MYA-4617 / FGSC 8958) (Rice blast fungus) (Pyricularia oryzae)	475		nucleus [GO:0005634]	nucleus [GO:0005634]; DNA-binding transcription factor activity, RNA polymerase II-specific [GO:0000981]; zinc ion binding [GO:0008270]	DNA-binding transcription factor activity, RNA polymerase II-specific [GO:0000981]; zinc ion binding [GO:0008270]	GO:0000981; GO:0005634; GO:0008270	PHI:5668	Zn2Cys6 transcription factor	0	unaffected pathogenicity
				1	1276287	1277758	MGG_02290		protein_coding	Putative uncharacterized protein [Source:UniProtKB/TrEMBL%3BAcc:G4MQ50]	broad_genes	G4MQ50	G4MQ50_MAGO7	unreviewed	Uncharacterized protein	MGG_02290	Magnaporthe oryzae (strain 70-15 / ATCC MYA-4617 / FGSC 8958) (Rice blast fungus) (Pyricularia oryzae)	300		integral component of membrane [GO:0016021]	integral component of membrane [GO:0016021]		GO:0016021
				1	1280546	1282469	MGG_14591		protein_coding	Cytochrome P450 3A24 [Source:UniProtKB/TrEMBL%3BAcc:G4MQ51]	broad_genes	G4MQ51	G4MQ51_MAGO7	unreviewed	Cytochrome P450 3A24	MGG_14591	Magnaporthe oryzae (strain 70-15 / ATCC MYA-4617 / FGSC 8958) (Rice blast fungus) (Pyricularia oryzae)	538			heme binding [GO:0020037]; iron ion binding [GO:0005506]; monooxygenase activity [GO:0004497]; oxidoreductase activity, acting on paired donors, with incorporation or reduction of molecular oxygen [GO:0016705]	heme binding [GO:0020037]; iron ion binding [GO:0005506]; monooxygenase activity [GO:0004497]; oxidoreductase activity, acting on paired donors, with incorporation or reduction of molecular oxygen [GO:0016705]	GO:0004497; GO:0005506; GO:0016705; GO:0020037
				1	1283518	1285068	MGG_14590		protein_coding	Putative uncharacterized protein [Source:UniProtKB/TrEMBL%3BAcc:G4MQ52]	broad_genes	G4MQ52	G4MQ52_MAGO7	unreviewed	FAD_binding_3 domain-containing protein	MGG_14590	Magnaporthe oryzae (strain 70-15 / ATCC MYA-4617 / FGSC 8958) (Rice blast fungus) (Pyricularia oryzae)	447			FAD binding [GO:0071949]	FAD binding [GO:0071949]	GO:0071949
				1	1285599	1286054	MGG_02293		protein_coding	Putative uncharacterized protein [Source:UniProtKB/TrEMBL%3BAcc:G4MQ53]	broad_genes	G4MQ53	G4MQ53_MAGO7	unreviewed	Uncharacterized protein	MGG_02293	Magnaporthe oryzae (strain 70-15 / ATCC MYA-4617 / FGSC 8958) (Rice blast fungus) (Pyricularia oryzae)	151		integral component of membrane [GO:0016021]	integral component of membrane [GO:0016021]		GO:0016021
				1	1286632	1288591	MGG_02294		protein_coding	Ent-kaurene oxidase [Source:UniProtKB/TrEMBL%3BAcc:G4MQ54]	broad_genes	G4MQ54	G4MQ54_MAGO7	unreviewed	Ent-kaurene oxidase	MGG_02294	Magnaporthe oryzae (strain 70-15 / ATCC MYA-4617 / FGSC 8958) (Rice blast fungus) (Pyricularia oryzae)	539			heme binding [GO:0020037]; iron ion binding [GO:0005506]; monooxygenase activity [GO:0004497]; oxidoreductase activity, acting on paired donors, with incorporation or reduction of molecular oxygen [GO:0016705]	heme binding [GO:0020037]; iron ion binding [GO:0005506]; monooxygenase activity [GO:0004497]; oxidoreductase activity, acting on paired donors, with incorporation or reduction of molecular oxygen [GO:0016705]	GO:0004497; GO:0005506; GO:0016705; GO:0020037
				1	1289482	1289710	MGG_16086		protein_coding	Putative uncharacterized protein [Source:UniProtKB/TrEMBL%3BAcc:G4MQ55]	broad_genes	G4MQ55	G4MQ55_MAGO7	unreviewed	Uncharacterized protein	MGG_16086	Magnaporthe oryzae (strain 70-15 / ATCC MYA-4617 / FGSC 8958) (Rice blast fungus) (Pyricularia oryzae)	53
				1	1291239	1292700	MGG_02295		protein_coding	Putative uncharacterized protein [Source:UniProtKB/TrEMBL%3BAcc:G4MQ56]	broad_genes	G4MQ56	G4MQ56_MAGO7	unreviewed	Uncharacterized protein	MGG_02295	Magnaporthe oryzae (strain 70-15 / ATCC MYA-4617 / FGSC 8958) (Rice blast fungus) (Pyricularia oryzae)	467
				1	1293148	1293718	MGG_02296		protein_coding	Putative uncharacterized protein [Source:UniProtKB/TrEMBL%3BAcc:G4MQ57]	broad_genes	G4MQ57	G4MQ57_MAGO7	unreviewed	Uncharacterized protein	MGG_02296	Magnaporthe oryzae (strain 70-15 / ATCC MYA-4617 / FGSC 8958) (Rice blast fungus) (Pyricularia oryzae)	164
				1	1295285	1297464	MGG_02297		protein_coding	Putative uncharacterized protein [Source:UniProtKB/TrEMBL%3BAcc:G4MQ58]	broad_genes	G4MQ58	G4MQ58_MAGO7	unreviewed	Protein OS-9 homolog	MGG_02297	Magnaporthe oryzae (strain 70-15 / ATCC MYA-4617 / FGSC 8958) (Rice blast fungus) (Pyricularia oryzae)	596		endoplasmic reticulum membrane [GO:0005789]	endoplasmic reticulum membrane [GO:0005789]; carbohydrate binding [GO:0030246]	carbohydrate binding [GO:0030246]	GO:0005789; GO:0030246
				1	1297875	1297946	EFMOG00000000226	tRNA-Pseudo	tRNA_pseudogene	tRNA-Pseudo for anticodon GUU [Source:TRNASCAN_SE%3BAcc:tRNA-Pseudo]	ncrna_eg	tRNA-Pseudo
20	IRBLz5-CA_2_5441644	2	5441644	2	5395334	5395967	MGG_15338		protein_coding	Putative uncharacterized protein [Source:UniProtKB/TrEMBL%3BAcc:G4MX50]	broad_genes	G4MX50	G4MX50_MAGO7	unreviewed	Uncharacterized protein	MGG_15338	Magnaporthe oryzae (strain 70-15 / ATCC MYA-4617 / FGSC 8958) (Rice blast fungus) (Pyricularia oryzae)	100
				2	5396380	5399471	MGG_08005		protein_coding	Phosphoinositide 3-phosphate phosphatase [Source:UniProtKB/TrEMBL%3BAcc:G4MX51]	broad_genes	G4MX51	G4MX51_MAGO7	unreviewed	Phosphoinositide 3-phosphate phosphatase	MGG_08005	Magnaporthe oryzae (strain 70-15 / ATCC MYA-4617 / FGSC 8958) (Rice blast fungus) (Pyricularia oryzae)	658			protein tyrosine phosphatase activity [GO:0004725]	protein tyrosine phosphatase activity [GO:0004725]	GO:0004725
				2	5399852	5401884	MGG_08006		protein_coding	Putative uncharacterized protein [Source:UniProtKB/TrEMBL%3BAcc:G4MX52]	broad_genes	G4MX52	G4MX52_MAGO7	unreviewed	Uncharacterized protein	MGG_08006	Magnaporthe oryzae (strain 70-15 / ATCC MYA-4617 / FGSC 8958) (Rice blast fungus) (Pyricularia oryzae)	280		integral component of membrane [GO:0016021]	integral component of membrane [GO:0016021]		GO:0016021
				2	5402249	5404075	MGG_08007		protein_coding	Putative uncharacterized protein [Source:UniProtKB/TrEMBL%3BAcc:G4MX53]	broad_genes	G4MX53	G4MX53_MAGO7	unreviewed	AB hydrolase-1 domain-containing protein	MGG_08007	Magnaporthe oryzae (strain 70-15 / ATCC MYA-4617 / FGSC 8958) (Rice blast fungus) (Pyricularia oryzae)	253
				2	5404224	5405452	MGG_08008		protein_coding	Formyltetrahydrofolate deformylase [Source:UniProtKB/TrEMBL%3BAcc:G4MX54]	broad_genes	G4MX54	G4MX54_MAGO7	unreviewed	Formyltetrahydrofolate deformylase	MGG_08008	Magnaporthe oryzae (strain 70-15 / ATCC MYA-4617 / FGSC 8958) (Rice blast fungus) (Pyricularia oryzae)	284	'de novo' IMP biosynthetic process [GO:0006189]; one-carbon metabolic process [GO:0006730]		formyltetrahydrofolate deformylase activity [GO:0008864]; hydroxymethyl-, formyl- and related transferase activity [GO:0016742]; 'de novo' IMP biosynthetic process [GO:0006189]; one-carbon metabolic process [GO:0006730]	formyltetrahydrofolate deformylase activity [GO:0008864]; hydroxymethyl-, formyl- and related transferase activity [GO:0016742]	GO:0006189; GO:0006730; GO:0008864; GO:0016742
				2	5405415	5408076	MGG_08010		protein_coding	Dolichyl-P-Man:Man(5)GlcNAc(2)-PP-dolichyl mannosyltransferase [Source:UniProtKB/TrEMBL%3BAcc:G4MX55]	broad_genes	G4MX55	G4MX55_MAGO7	unreviewed	Dol-P-Man:Man(5)GlcNAc(2)-PP-Dol alpha-1,3-mannosyltransferase (EC 2.4.1.258) (Dol-P-Man-dependent alpha(1-3)-mannosyltransferase)	MGG_08010	Magnaporthe oryzae (strain 70-15 / ATCC MYA-4617 / FGSC 8958) (Rice blast fungus) (Pyricularia oryzae)	432	protein glycosylation [GO:0006486]	endoplasmic reticulum membrane [GO:0005789]; integral component of membrane [GO:0016021]	endoplasmic reticulum membrane [GO:0005789]; integral component of membrane [GO:0016021]; dol-P-Man:Man(5)GlcNAc(2)-PP-Dol alpha-1,3-mannosyltransferase activity [GO:0052925]; protein glycosylation [GO:0006486]	dol-P-Man:Man(5)GlcNAc(2)-PP-Dol alpha-1,3-mannosyltransferase activity [GO:0052925]	GO:0005789; GO:0006486; GO:0016021; GO:0052925
				2	5408216	5409781	MGG_08011		protein_coding	D-amino-acid oxidase [Source:UniProtKB/TrEMBL%3BAcc:G4MX56]	broad_genes	G4MX56	G4MX56_MAGO7	unreviewed	D-amino-acid oxidase	MGG_08011	Magnaporthe oryzae (strain 70-15 / ATCC MYA-4617 / FGSC 8958) (Rice blast fungus) (Pyricularia oryzae)	363	D-amino acid metabolic process [GO:0046416]		D-amino-acid oxidase activity [GO:0003884]; FAD binding [GO:0071949]; D-amino acid metabolic process [GO:0046416]	D-amino-acid oxidase activity [GO:0003884]; FAD binding [GO:0071949]	GO:0003884; GO:0046416; GO:0071949
				2	5410032	5412294	MGG_08012		protein_coding	UDP-glucose 4-epimerase [Source:UniProtKB/TrEMBL%3BAcc:G4MX57]	broad_genes	G4MX57	G4MX57_MAGO7	unreviewed	UDP-glucose 4-epimerase (EC 5.1.3.2)	MGG_08012	Magnaporthe oryzae (strain 70-15 / ATCC MYA-4617 / FGSC 8958) (Rice blast fungus) (Pyricularia oryzae)	369	galactose metabolic process [GO:0006012]		UDP-glucose 4-epimerase activity [GO:0003978]; galactose metabolic process [GO:0006012]	UDP-glucose 4-epimerase activity [GO:0003978]	GO:0003978; GO:0006012
				2	5412430	5417499	MGG_15339		protein_coding	Putative uncharacterized protein [Source:UniProtKB/TrEMBL%3BAcc:G4MX58]	broad_genes	G4MX58	G4MX58_MAGO7	unreviewed	SUN domain-containing protein	MGG_15339	Magnaporthe oryzae (strain 70-15 / ATCC MYA-4617 / FGSC 8958) (Rice blast fungus) (Pyricularia oryzae)	1233
				2	5417883	5419157	MGG_15340		protein_coding	Putative uncharacterized protein [Source:UniProtKB/TrEMBL%3BAcc:G4MX60]	broad_genes	G4MX60	G4MX60_MAGO7	unreviewed	Uncharacterized protein	MGG_15340	Magnaporthe oryzae (strain 70-15 / ATCC MYA-4617 / FGSC 8958) (Rice blast fungus) (Pyricularia oryzae)	327
				2	5419105	5422975	MGG_08014		protein_coding	Putative uncharacterized protein [Source:UniProtKB/TrEMBL%3BAcc:G4MX61]	broad_genes	G4MX61	G4MX61_MAGO7	unreviewed	GH115_C domain-containing protein	MGG_08014	Magnaporthe oryzae (strain 70-15 / ATCC MYA-4617 / FGSC 8958) (Rice blast fungus) (Pyricularia oryzae)	1091		integral component of membrane [GO:0016021]	integral component of membrane [GO:0016021]		GO:0016021
				2	5422393	5422485	EFMOG00000000361	tRNA-Lys	tRNA_pseudogene	tRNA-Lys for anticodon CUU [Source:TRNASCAN_SE%3BAcc:tRNA-Lys]	ncrna_eg	tRNA-Lys
				2	5422393	5422485	ENSRNA049569441	tRNA-Lys	tRNA	tRNA-Lys for anticodon CUU	trnascan_gene
				2	5423799	5425757	MGG_08015		protein_coding	Putative uncharacterized protein [Source:UniProtKB/TrEMBL%3BAcc:G4MX62]	broad_genes	G4MX62	G4MX62_MAGO7	unreviewed	Uncharacterized protein	MGG_08015	Magnaporthe oryzae (strain 70-15 / ATCC MYA-4617 / FGSC 8958) (Rice blast fungus) (Pyricularia oryzae)	323			DNA binding [GO:0003677]; metal ion binding [GO:0046872]	DNA binding [GO:0003677]; metal ion binding [GO:0046872]	GO:0003677; GO:0046872
				2	5425986	5428490	MGG_08016		protein_coding	Retinal pigment epithelial membrane family protein [Source:UniProtKB/TrEMBL%3BAcc:G4MX63]	broad_genes	G4MX63	G4MX63_MAGO7	unreviewed	Retinal pigment epithelial membrane family protein	MGG_08016	Magnaporthe oryzae (strain 70-15 / ATCC MYA-4617 / FGSC 8958) (Rice blast fungus) (Pyricularia oryzae)	558			metal ion binding [GO:0046872]; oxidoreductase activity, acting on single donors with incorporation of molecular oxygen, incorporation of two atoms of oxygen [GO:0016702]	metal ion binding [GO:0046872]; oxidoreductase activity, acting on single donors with incorporation of molecular oxygen, incorporation of two atoms of oxygen [GO:0016702]	GO:0016702; GO:0046872
				2	5429462	5432919	MGG_08017		protein_coding	Putative uncharacterized protein [Source:UniProtKB/TrEMBL%3BAcc:G4MX64]	broad_genes	G4MX64	G4MX64_MAGO7	unreviewed	MFS domain-containing protein	MGG_08017	Magnaporthe oryzae (strain 70-15 / ATCC MYA-4617 / FGSC 8958) (Rice blast fungus) (Pyricularia oryzae)	704		integral component of membrane [GO:0016021]	integral component of membrane [GO:0016021]; transmembrane transporter activity [GO:0022857]	transmembrane transporter activity [GO:0022857]	GO:0016021; GO:0022857
				2	5433138	5433831	MGG_08018		protein_coding	Putative uncharacterized protein [Source:UniProtKB/TrEMBL%3BAcc:G4MX65]	broad_genes	G4MX65	G4MX65_MAGO7	unreviewed	Uncharacterized protein	MGG_08018	Magnaporthe oryzae (strain 70-15 / ATCC MYA-4617 / FGSC 8958) (Rice blast fungus) (Pyricularia oryzae)	88
				2	5435492	5437711	MGG_08019		protein_coding	F-box domain-containing protein [Source:UniProtKB/TrEMBL%3BAcc:G4MX66]	broad_genes	G4MX66	G4MX66_MAGO7	unreviewed	F-box domain-containing protein	MGG_08019	Magnaporthe oryzae (strain 70-15 / ATCC MYA-4617 / FGSC 8958) (Rice blast fungus) (Pyricularia oryzae)	340
				2	5438367	5439795	MGG_08020		protein_coding	Endoglucanase-4 [Source:UniProtKB/TrEMBL%3BAcc:G4MX68]	broad_genes	G4MX68	G4MX68_MAGO7	unreviewed	Endoglucanase-4	MGG_08020	Magnaporthe oryzae (strain 70-15 / ATCC MYA-4617 / FGSC 8958) (Rice blast fungus) (Pyricularia oryzae)	271		extracellular region [GO:0005576]	extracellular region [GO:0005576]		GO:0005576
				2	5440724	5442347	MGG_08021		protein_coding	HD family hydrolase [Source:UniProtKB/TrEMBL%3BAcc:G4MX69]	broad_genes	G4MX69	G4MX69_MAGO7	unreviewed	5'-deoxynucleotidase (EC 3.1.3.89)	MGG_08021	Magnaporthe oryzae (strain 70-15 / ATCC MYA-4617 / FGSC 8958) (Rice blast fungus) (Pyricularia oryzae)	278			5'-deoxynucleotidase activity [GO:0002953]	5'-deoxynucleotidase activity [GO:0002953]	GO:0002953
				2	5442773	5446141	MGG_08022		protein_coding	Putative uncharacterized protein [Source:UniProtKB/TrEMBL%3BAcc:G4MX70]	broad_genes	G4MX70	G4MX70_MAGO7	unreviewed	Uncharacterized protein	MGG_08022	Magnaporthe oryzae (strain 70-15 / ATCC MYA-4617 / FGSC 8958) (Rice blast fungus) (Pyricularia oryzae)	664
				2	5445803	5449425	MGG_15803		protein_coding	Putative uncharacterized protein [Source:UniProtKB/TrEMBL%3BAcc:G4MX71]	broad_genes	G4MX71	G4MX71_MAGO7	unreviewed	Uncharacterized protein	MGG_15803	Magnaporthe oryzae (strain 70-15 / ATCC MYA-4617 / FGSC 8958) (Rice blast fungus) (Pyricularia oryzae)	893
				2	5451736	5452044	MGG_08024		protein_coding	Putative uncharacterized protein [Source:UniProtKB/TrEMBL%3BAcc:G4MX72]	broad_genes	G4MX72	G4MX72_MAGO7	unreviewed	Uncharacterized protein	MGG_08024	Magnaporthe oryzae (strain 70-15 / ATCC MYA-4617 / FGSC 8958) (Rice blast fungus) (Pyricularia oryzae)	102
				2	5452900	5458707	MGG_08025		protein_coding	Putative uncharacterized protein [Source:UniProtKB/TrEMBL%3BAcc:G4MXN4]	broad_genes	G4MXN4	G4MXN4_MAGO7	unreviewed	Uncharacterized protein	MGG_08025	Magnaporthe oryzae (strain 70-15 / ATCC MYA-4617 / FGSC 8958) (Rice blast fungus) (Pyricularia oryzae)	1664	carbohydrate metabolic process [GO:0005975]	extracellular region [GO:0005576]; integral component of membrane [GO:0016021]	extracellular region [GO:0005576]; integral component of membrane [GO:0016021]; cellulose binding [GO:0030248]; hydrolase activity [GO:0016787]; carbohydrate metabolic process [GO:0005975]	cellulose binding [GO:0030248]; hydrolase activity [GO:0016787]	GO:0005576; GO:0005975; GO:0016021; GO:0016787; GO:0030248
				2	5458688	5459193	MGG_15804		protein_coding	Putative uncharacterized protein [Source:UniProtKB/TrEMBL%3BAcc:G4MXN5]	broad_genes	G4MXN5	G4MXN5_MAGO7	unreviewed	Uncharacterized protein	MGG_15804	Magnaporthe oryzae (strain 70-15 / ATCC MYA-4617 / FGSC 8958) (Rice blast fungus) (Pyricularia oryzae)	63
				2	5460547	5461584	MGG_08026		protein_coding	Putative uncharacterized protein [Source:UniProtKB/TrEMBL%3BAcc:G4MXN6]	broad_genes	G4MXN6	G4MXN6_MAGO7	unreviewed	Uncharacterized protein	MGG_08026	Magnaporthe oryzae (strain 70-15 / ATCC MYA-4617 / FGSC 8958) (Rice blast fungus) (Pyricularia oryzae)	103		integral component of membrane [GO:0016021]	integral component of membrane [GO:0016021]		GO:0016021
				2	5464209	5464841	MGG_15805		protein_coding	Putative uncharacterized protein [Source:UniProtKB/TrEMBL%3BAcc:G4MXN7]	broad_genes	G4MXN7	G4MXN7_MAGO7	unreviewed	Uncharacterized protein	MGG_15805	Magnaporthe oryzae (strain 70-15 / ATCC MYA-4617 / FGSC 8958) (Rice blast fungus) (Pyricularia oryzae)	102
				2	5466108	5466827	MGG_08027		protein_coding	Putative uncharacterized protein [Source:UniProtKB/TrEMBL%3BAcc:G4MXN8]	broad_genes	G4MXN8	G4MXN8_MAGO7	unreviewed	Uncharacterized protein	MGG_08027	Magnaporthe oryzae (strain 70-15 / ATCC MYA-4617 / FGSC 8958) (Rice blast fungus) (Pyricularia oryzae)	239
				2	5473375	5473837	MGG_15806		pseudogene		broad_genes
				2	5474364	5476054	MGG_15807		protein_coding	Putative uncharacterized protein [Source:UniProtKB/TrEMBL%3BAcc:G4MXP0]	broad_genes	G4MXP0	G4MXP0_MAGO7	unreviewed	Uncharacterized protein	MGG_15807	Magnaporthe oryzae (strain 70-15 / ATCC MYA-4617 / FGSC 8958) (Rice blast fungus) (Pyricularia oryzae)	211
				2	5483647	5484733	MGG_12264		protein_coding	Putative uncharacterized protein [Source:UniProtKB/TrEMBL%3BAcc:G4MXP1]	broad_genes	G4MXP1	G4MXP1_MAGO7	unreviewed	FMN_red domain-containing protein	MGG_12264	Magnaporthe oryzae (strain 70-15 / ATCC MYA-4617 / FGSC 8958) (Rice blast fungus) (Pyricularia oryzae)	293			oxidoreductase activity [GO:0016491]	oxidoreductase activity [GO:0016491]	GO:0016491
				2	5485082	5485785	MGG_08034		protein_coding	Putative uncharacterized protein [Source:UniProtKB/TrEMBL%3BAcc:G4MXP2]	broad_genes	G4MXP2	G4MXP2_MAGO7	unreviewed	Rhodanese domain-containing protein	MGG_08034	Magnaporthe oryzae (strain 70-15 / ATCC MYA-4617 / FGSC 8958) (Rice blast fungus) (Pyricularia oryzae)	157
				2	5489554	5490841	MGG_15808		protein_coding	Putative uncharacterized protein [Source:UniProtKB/TrEMBL%3BAcc:G4MXP3]	broad_genes	G4MXP3	G4MXP3_MAGO7	unreviewed	Uncharacterized protein	MGG_15808	Magnaporthe oryzae (strain 70-15 / ATCC MYA-4617 / FGSC 8958) (Rice blast fungus) (Pyricularia oryzae)	287
				2	5491540	5493673	MGG_08035		protein_coding	E3 ubiquitin-protein ligase CHIP [Source:UniProtKB/TrEMBL%3BAcc:G4MXP4]	broad_genes	G4MXP4	G4MXP4_MAGO7	unreviewed	E3 ubiquitin-protein ligase CHIP	MGG_08035	Magnaporthe oryzae (strain 70-15 / ATCC MYA-4617 / FGSC 8958) (Rice blast fungus) (Pyricularia oryzae)	284			ubiquitin-protein transferase activity [GO:0004842]	ubiquitin-protein transferase activity [GO:0004842]	GO:0004842
21	IRBLz5-CA_3_1645410	3	1645410	3	1595142	1595604	MGG_16695		pseudogene		broad_genes
				3	1600901	1601921	MGG_05819		protein_coding	Putative uncharacterized protein [Source:UniProtKB/TrEMBL%3BAcc:G4N3G1]	broad_genes	G4N3G1	G4N3G1_MAGO7	unreviewed	Uncharacterized protein	MGG_05819	Magnaporthe oryzae (strain 70-15 / ATCC MYA-4617 / FGSC 8958) (Rice blast fungus) (Pyricularia oryzae)	219		integral component of membrane [GO:0016021]	integral component of membrane [GO:0016021]		GO:0016021
				3	1603155	1603868	MGG_16696		protein_coding	Putative uncharacterized protein [Source:UniProtKB/TrEMBL%3BAcc:G4N3G2]	broad_genes	G4N3G2	G4N3G2_MAGO7	unreviewed	J domain-containing protein	MGG_16696	Magnaporthe oryzae (strain 70-15 / ATCC MYA-4617 / FGSC 8958) (Rice blast fungus) (Pyricularia oryzae)	237
				3	1606046	1606501	MGG_05821		protein_coding	Putative uncharacterized protein [Source:UniProtKB/TrEMBL%3BAcc:G4N3G3]	broad_genes	G4N3G3	G4N3G3_MAGO7	unreviewed	Uncharacterized protein	MGG_05821	Magnaporthe oryzae (strain 70-15 / ATCC MYA-4617 / FGSC 8958) (Rice blast fungus) (Pyricularia oryzae)	118
				3	1612083	1612436	MGG_16697		protein_coding	Putative uncharacterized protein [Source:UniProtKB/TrEMBL%3BAcc:G4N3G4]	broad_genes	G4N3G4	G4N3G4_MAGO7	unreviewed	Uncharacterized protein	MGG_16697	Magnaporthe oryzae (strain 70-15 / ATCC MYA-4617 / FGSC 8958) (Rice blast fungus) (Pyricularia oryzae)	117		integral component of membrane [GO:0016021]	integral component of membrane [GO:0016021]		GO:0016021
				3	1613839	1614325	MGG_16698		protein_coding	Putative uncharacterized protein [Source:UniProtKB/TrEMBL%3BAcc:G4N3G5]	broad_genes	G4N3G5	G4N3G5_MAGO7	unreviewed	Uncharacterized protein	MGG_16698	Magnaporthe oryzae (strain 70-15 / ATCC MYA-4617 / FGSC 8958) (Rice blast fungus) (Pyricularia oryzae)	120
				3	1618276	1620021	MGG_05824		protein_coding	Putative uncharacterized protein [Source:UniProtKB/TrEMBL%3BAcc:G4N3M0]	broad_genes	G4N3M0	G4N3M0_MAGO7	unreviewed	Uncharacterized protein	MGG_05824	Magnaporthe oryzae (strain 70-15 / ATCC MYA-4617 / FGSC 8958) (Rice blast fungus) (Pyricularia oryzae)	432			UDP-glycosyltransferase activity [GO:0008194]	UDP-glycosyltransferase activity [GO:0008194]	GO:0008194
				3	1620645	1622676	MGG_05825		protein_coding	Transferase [Source:UniProtKB/TrEMBL%3BAcc:G4N3M1]	broad_genes	G4N3M1	G4N3M1_MAGO7	unreviewed	Transferase	MGG_05825	Magnaporthe oryzae (strain 70-15 / ATCC MYA-4617 / FGSC 8958) (Rice blast fungus) (Pyricularia oryzae)	579			acyltransferase activity, transferring groups other than amino-acyl groups [GO:0016747]	acyltransferase activity, transferring groups other than amino-acyl groups [GO:0016747]	GO:0016747
				3	1622447	1623984	MGG_05826		protein_coding	Epoxide hydrolase 2 [Source:UniProtKB/TrEMBL%3BAcc:G4N3M2]	broad_genes	G4N3M2	G4N3M2_MAGO7	unreviewed	Epoxide hydrolase 2	MGG_05826	Magnaporthe oryzae (strain 70-15 / ATCC MYA-4617 / FGSC 8958) (Rice blast fungus) (Pyricularia oryzae)	357			hydrolase activity [GO:0016787]	hydrolase activity [GO:0016787]	GO:0016787
				3	1625520	1625609	EFMOG00000000177	tRNA-Ala	tRNA_pseudogene	tRNA-Ala for anticodon AGC [Source:TRNASCAN_SE%3BAcc:tRNA-Ala]	ncrna_eg	tRNA-Ala
				3	1625520	1625609	ENSRNA049563281	tRNA-Ala	tRNA	tRNA-Ala for anticodon AGC	trnascan_gene
				3	1627114	1628442	MGG_05827		protein_coding	Glutamyl-tRNA(Gln) amidotransferase subunit A [Source:UniProtKB/TrEMBL%3BAcc:G4N3M3]	broad_genes	G4N3M3	G4N3M3_MAGO7	unreviewed	Glutamyl-tRNA(Gln) amidotransferase subunit A	MGG_05827	Magnaporthe oryzae (strain 70-15 / ATCC MYA-4617 / FGSC 8958) (Rice blast fungus) (Pyricularia oryzae)	442			transferase activity [GO:0016740]	transferase activity [GO:0016740]	GO:0016740
				3	1629110	1630264	MGG_05828		protein_coding	Chitin deacetylase 1 [Source:UniProtKB/TrEMBL%3BAcc:G4N3M4]	broad_genes	G4N3M4	G4N3M4_MAGO7	unreviewed	Chitin deacetylase 1	MGG_05828	Magnaporthe oryzae (strain 70-15 / ATCC MYA-4617 / FGSC 8958) (Rice blast fungus) (Pyricularia oryzae)	329	carbohydrate metabolic process [GO:0005975]		hydrolase activity, acting on carbon-nitrogen (but not peptide) bonds [GO:0016810]; carbohydrate metabolic process [GO:0005975]	hydrolase activity, acting on carbon-nitrogen (but not peptide) bonds [GO:0016810]	GO:0005975; GO:0016810
				3	1630340	1632699	MGG_05829		protein_coding	Putative uncharacterized protein [Source:UniProtKB/TrEMBL%3BAcc:G4N3M5]	broad_genes	G4N3M5	G4N3M5_MAGO7	unreviewed	Fungal_trans domain-containing protein	MGG_05829	Magnaporthe oryzae (strain 70-15 / ATCC MYA-4617 / FGSC 8958) (Rice blast fungus) (Pyricularia oryzae)	542	transcription, DNA-templated [GO:0006351]	integral component of membrane [GO:0016021]	integral component of membrane [GO:0016021]; DNA binding [GO:0003677]; zinc ion binding [GO:0008270]; transcription, DNA-templated [GO:0006351]	DNA binding [GO:0003677]; zinc ion binding [GO:0008270]	GO:0003677; GO:0006351; GO:0008270; GO:0016021	PHI:5602	Zn2Cys6 transcription factor	0	unaffected pathogenicity
				3	1633627	1635636	MGG_05830		protein_coding	Allantoin transporter [Source:UniProtKB/TrEMBL%3BAcc:G4N3M6]	broad_genes	G4N3M6	G4N3M6_MAGO7	unreviewed	Allantoin transporter	MGG_05830	Magnaporthe oryzae (strain 70-15 / ATCC MYA-4617 / FGSC 8958) (Rice blast fungus) (Pyricularia oryzae)	594		integral component of membrane [GO:0016021]	integral component of membrane [GO:0016021]; transmembrane transporter activity [GO:0022857]	transmembrane transporter activity [GO:0022857]	GO:0016021; GO:0022857
				3	1636667	1637242	MGG_05831		protein_coding	Putative uncharacterized protein [Source:UniProtKB/TrEMBL%3BAcc:G4N3M7]	broad_genes	G4N3M7	G4N3M7_MAGO7	unreviewed	Uncharacterized protein	MGG_05831	Magnaporthe oryzae (strain 70-15 / ATCC MYA-4617 / FGSC 8958) (Rice blast fungus) (Pyricularia oryzae)	191
				3	1638117	1639352	MGG_05832		protein_coding	Putative uncharacterized protein [Source:UniProtKB/TrEMBL%3BAcc:G4N3M8]	broad_genes	G4N3M8	G4N3M8_MAGO7	unreviewed	Uncharacterized protein	MGG_05832	Magnaporthe oryzae (strain 70-15 / ATCC MYA-4617 / FGSC 8958) (Rice blast fungus) (Pyricularia oryzae)	411
				3	1640168	1640239	EFMOG00000000018	tRNA-Pseudo	tRNA_pseudogene	tRNA-Pseudo for anticodon GUU [Source:TRNASCAN_SE%3BAcc:tRNA-Pseudo]	ncrna_eg	tRNA-Pseudo
				3	1641078	1642950	MGG_05833		protein_coding	Vacuolar basic amino acid transporter 1 [Source:UniProtKB/TrEMBL%3BAcc:G4N3M9]	broad_genes	G4N3M9	G4N3M9_MAGO7	unreviewed	Vacuolar basic amino acid transporter 1	MGG_05833	Magnaporthe oryzae (strain 70-15 / ATCC MYA-4617 / FGSC 8958) (Rice blast fungus) (Pyricularia oryzae)	596		integral component of membrane [GO:0016021]	integral component of membrane [GO:0016021]; transmembrane transporter activity [GO:0022857]	transmembrane transporter activity [GO:0022857]	GO:0016021; GO:0022857
				3	1662566	1663509	MGG_16699		protein_coding	Putative uncharacterized protein [Source:UniProtKB/TrEMBL%3BAcc:G4N3N0]	broad_genes	G4N3N0	G4N3N0_MAGO7	unreviewed	Uncharacterized protein	MGG_16699	Magnaporthe oryzae (strain 70-15 / ATCC MYA-4617 / FGSC 8958) (Rice blast fungus) (Pyricularia oryzae)	83
				3	1681993	1682432	MGG_16700		protein_coding	Putative uncharacterized protein [Source:UniProtKB/TrEMBL%3BAcc:G4N3N1]	broad_genes	G4N3N1	G4N3N1_MAGO7	unreviewed	Uncharacterized protein	MGG_16700	Magnaporthe oryzae (strain 70-15 / ATCC MYA-4617 / FGSC 8958) (Rice blast fungus) (Pyricularia oryzae)	91
				3	1687233	1688943	MGG_05841		protein_coding	Putative uncharacterized protein [Source:UniProtKB/TrEMBL%3BAcc:G4N3N2]	broad_genes	G4N3N2	G4N3N2_MAGO7	unreviewed	Methyltransf_25 domain-containing protein	MGG_05841	Magnaporthe oryzae (strain 70-15 / ATCC MYA-4617 / FGSC 8958) (Rice blast fungus) (Pyricularia oryzae)	457
				3	1689609	1690125	MGG_16701		protein_coding	Putative uncharacterized protein [Source:UniProtKB/TrEMBL%3BAcc:G4N3N3]	broad_genes	G4N3N3	G4N3N3_MAGO7	unreviewed	Uncharacterized protein	MGG_16701	Magnaporthe oryzae (strain 70-15 / ATCC MYA-4617 / FGSC 8958) (Rice blast fungus) (Pyricularia oryzae)	147
				3	1690243	1692074	MGG_05843		protein_coding	Putative uncharacterized protein [Source:UniProtKB/TrEMBL%3BAcc:G4N3N4]	broad_genes	G4N3N4	G4N3N4_MAGO7	unreviewed	Uncharacterized protein	MGG_05843	Magnaporthe oryzae (strain 70-15 / ATCC MYA-4617 / FGSC 8958) (Rice blast fungus) (Pyricularia oryzae)	421		integral component of membrane [GO:0016021]	integral component of membrane [GO:0016021]; transmembrane transporter activity [GO:0022857]	transmembrane transporter activity [GO:0022857]	GO:0016021; GO:0022857
				3	1692163	1693997	MGG_05844		protein_coding	Mannan endo-1%2C4-beta-mannosidase 1 [Source:UniProtKB/TrEMBL%3BAcc:G4N3N5]	broad_genes	G4N3N5	G4N3N5_MAGO7	unreviewed	Mannan endo-1,4-beta-mannosidase 1	MGG_05844	Magnaporthe oryzae (strain 70-15 / ATCC MYA-4617 / FGSC 8958) (Rice blast fungus) (Pyricularia oryzae)	401	organic substance metabolic process [GO:0071704]		hydrolase activity, hydrolyzing O-glycosyl compounds [GO:0004553]; organic substance metabolic process [GO:0071704]	hydrolase activity, hydrolyzing O-glycosyl compounds [GO:0004553]	GO:0004553; GO:0071704
				3	1695066	1696934	MGG_05845		protein_coding	Putative uncharacterized protein [Source:UniProtKB/TrEMBL%3BAcc:G4N3N6]	broad_genes	G4N3N6	G4N3N6_MAGO7	unreviewed	Zn(2)-C6 fungal-type domain-containing protein	MGG_05845	Magnaporthe oryzae (strain 70-15 / ATCC MYA-4617 / FGSC 8958) (Rice blast fungus) (Pyricularia oryzae)	622		nucleus [GO:0005634]	nucleus [GO:0005634]; DNA-binding transcription factor activity, RNA polymerase II-specific [GO:0000981]; zinc ion binding [GO:0008270]	DNA-binding transcription factor activity, RNA polymerase II-specific [GO:0000981]; zinc ion binding [GO:0008270]	GO:0000981; GO:0005634; GO:0008270	PHI:5679	Zn2Cys6 transcription factor	0	unaffected pathogenicity
22	IRBLz5-CA_3_6316407	3	6316407	3	6266420	6267163	MGG_16967		protein_coding	Putative uncharacterized protein [Source:UniProtKB/TrEMBL%3BAcc:G4N2F7]	broad_genes	G4N2F7	G4N2F7_MAGO7	unreviewed	Uncharacterized protein	MGG_16967	Magnaporthe oryzae (strain 70-15 / ATCC MYA-4617 / FGSC 8958) (Rice blast fungus) (Pyricularia oryzae)	119
				3	6269650	6272310	MGG_07925		protein_coding	Putative uncharacterized protein [Source:UniProtKB/TrEMBL%3BAcc:G4N2F8]	broad_genes	G4N2F8	G4N2F8_MAGO7	unreviewed	Uncharacterized protein	MGG_07925	Magnaporthe oryzae (strain 70-15 / ATCC MYA-4617 / FGSC 8958) (Rice blast fungus) (Pyricularia oryzae)	658
				3	6272367	6273930	MGG_07926		protein_coding	Putative uncharacterized protein [Source:UniProtKB/TrEMBL%3BAcc:G4N2F9]	broad_genes	G4N2F9	G4N2F9_MAGO7	unreviewed	Uncharacterized protein	MGG_07926	Magnaporthe oryzae (strain 70-15 / ATCC MYA-4617 / FGSC 8958) (Rice blast fungus) (Pyricularia oryzae)	422
				3	6274269	6276520	MGG_07927		protein_coding	Endochitinase 1 [Source:UniProtKB/TrEMBL%3BAcc:G4N2G0]	broad_genes	G4N2G0	G4N2G0_MAGO7	unreviewed	Chitinase (EC 3.2.1.14)	MGG_07927	Magnaporthe oryzae (strain 70-15 / ATCC MYA-4617 / FGSC 8958) (Rice blast fungus) (Pyricularia oryzae)	456	chitin catabolic process [GO:0006032]; polysaccharide catabolic process [GO:0000272]	extracellular region [GO:0005576]	extracellular region [GO:0005576]; chitin binding [GO:0008061]; chitinase activity [GO:0004568]; chitin catabolic process [GO:0006032]; polysaccharide catabolic process [GO:0000272]	chitinase activity [GO:0004568]; chitin binding [GO:0008061]	GO:0000272; GO:0004568; GO:0005576; GO:0006032; GO:0008061
				3	6276358	6277386	MGG_07928		protein_coding	Ubiquitin-40S ribosomal protein S27a [Source:UniProtKB/TrEMBL%3BAcc:G4N2G1]	broad_genes	G4N2G1	G4N2G1_MAGO7	unreviewed	Ubiquitin-40S ribosomal protein S27a	MGG_07928	Magnaporthe oryzae (strain 70-15 / ATCC MYA-4617 / FGSC 8958) (Rice blast fungus) (Pyricularia oryzae)	154	translation [GO:0006412]	ribosome [GO:0005840]	ribosome [GO:0005840]; metal ion binding [GO:0046872]; structural constituent of ribosome [GO:0003735]; translation [GO:0006412]	metal ion binding [GO:0046872]; structural constituent of ribosome [GO:0003735]	GO:0003735; GO:0005840; GO:0006412; GO:0046872
				3	6277642	6278438	MGG_07929		protein_coding	40S ribosomal protein S26E [Source:UniProtKB/TrEMBL%3BAcc:G4N2G2]	broad_genes	G4N2G2	G4N2G2_MAGO7	unreviewed	40S ribosomal protein S26	MGG_07929	Magnaporthe oryzae (strain 70-15 / ATCC MYA-4617 / FGSC 8958) (Rice blast fungus) (Pyricularia oryzae)	119	translation [GO:0006412]	ribosome [GO:0005840]	ribosome [GO:0005840]; structural constituent of ribosome [GO:0003735]; translation [GO:0006412]	structural constituent of ribosome [GO:0003735]	GO:0003735; GO:0005840; GO:0006412
				3	6278866	6279366	MGG_07930		protein_coding	Putative uncharacterized protein [Source:UniProtKB/TrEMBL%3BAcc:G4N2G3]	broad_genes	G4N2G3	G4N2G3_MAGO7	unreviewed	Uncharacterized protein	MGG_07930	Magnaporthe oryzae (strain 70-15 / ATCC MYA-4617 / FGSC 8958) (Rice blast fungus) (Pyricularia oryzae)	117
				3	6279651	6280193	MGG_16968		protein_coding	Putative uncharacterized protein [Source:UniProtKB/TrEMBL%3BAcc:G4N2G4]	broad_genes	G4N2G4	G4N2G4_MAGO7	unreviewed	Uncharacterized protein	MGG_16968	Magnaporthe oryzae (strain 70-15 / ATCC MYA-4617 / FGSC 8958) (Rice blast fungus) (Pyricularia oryzae)	71
				3	6280326	6281981	MGG_07931		protein_coding	Putative uncharacterized protein [Source:UniProtKB/TrEMBL%3BAcc:G4N2G5]	broad_genes	G4N2G5	G4N2G5_MAGO7	unreviewed	Uncharacterized protein	MGG_07931	Magnaporthe oryzae (strain 70-15 / ATCC MYA-4617 / FGSC 8958) (Rice blast fungus) (Pyricularia oryzae)	121	protein folding [GO:0006457]	prefoldin complex [GO:0016272]	prefoldin complex [GO:0016272]; unfolded protein binding [GO:0051082]; protein folding [GO:0006457]	unfolded protein binding [GO:0051082]	GO:0006457; GO:0016272; GO:0051082
				3	6282268	6284880	MGG_13915		protein_coding	STAM-binding protein [Source:UniProtKB/TrEMBL%3BAcc:G4N2G6]	broad_genes	G4N2G6	G4N2G6_MAGO7	unreviewed	STAM-binding protein	MGG_13915	Magnaporthe oryzae (strain 70-15 / ATCC MYA-4617 / FGSC 8958) (Rice blast fungus) (Pyricularia oryzae)	563			isopeptidase activity [GO:0070122]; Lys63-specific deubiquitinase activity [GO:0061578]; metallopeptidase activity [GO:0008237]	isopeptidase activity [GO:0070122]; Lys63-specific deubiquitinase activity [GO:0061578]; metallopeptidase activity [GO:0008237]	GO:0008237; GO:0061578; GO:0070122
				3	6285329	6286872	MGG_13916		protein_coding	Putative uncharacterized protein [Source:UniProtKB/TrEMBL%3BAcc:G4N2G7]	broad_genes	G4N2G7	G4N2G7_MAGO7	unreviewed	Uncharacterized protein	MGG_13916	Magnaporthe oryzae (strain 70-15 / ATCC MYA-4617 / FGSC 8958) (Rice blast fungus) (Pyricularia oryzae)	402
				3	6286925	6287292	MGG_15265		protein_coding	Putative uncharacterized protein [Source:UniProtKB/TrEMBL%3BAcc:G4N2G8]	broad_genes	G4N2G8	G4N2G8_MAGO7	unreviewed	Uncharacterized protein	MGG_15265	Magnaporthe oryzae (strain 70-15 / ATCC MYA-4617 / FGSC 8958) (Rice blast fungus) (Pyricularia oryzae)	96
				3	6287551	6290353	MGG_07933		protein_coding	Dihydrodipicolinate synthase [Source:UniProtKB/TrEMBL%3BAcc:G4N2G9]	broad_genes	G4N2G9	G4N2G9_MAGO7	unreviewed	Dihydrodipicolinate synthase	MGG_07933	Magnaporthe oryzae (strain 70-15 / ATCC MYA-4617 / FGSC 8958) (Rice blast fungus) (Pyricularia oryzae)	316			lyase activity [GO:0016829]	lyase activity [GO:0016829]	GO:0016829
				3	6290741	6291757	MGG_07934		protein_coding	Putative uncharacterized protein [Source:UniProtKB/TrEMBL%3BAcc:G4N2H0]	broad_genes	G4N2H0	G4N2H0_MAGO7	unreviewed	Uncharacterized protein	MGG_07934	Magnaporthe oryzae (strain 70-15 / ATCC MYA-4617 / FGSC 8958) (Rice blast fungus) (Pyricularia oryzae)	226
				3	6292786	6294409	MGG_07935		protein_coding	Galactonate dehydratase [Source:UniProtKB/TrEMBL%3BAcc:G4N2H1]	broad_genes	G4N2H1	G4N2H1_MAGO7	unreviewed	Galactonate dehydratase	MGG_07935	Magnaporthe oryzae (strain 70-15 / ATCC MYA-4617 / FGSC 8958) (Rice blast fungus) (Pyricularia oryzae)	383	cellular amino acid catabolic process [GO:0009063]; D-galactonate catabolic process [GO:0034194]		galactonate dehydratase activity [GO:0008869]; cellular amino acid catabolic process [GO:0009063]; D-galactonate catabolic process [GO:0034194]	galactonate dehydratase activity [GO:0008869]	GO:0008869; GO:0009063; GO:0034194
				3	6294248	6295854	MGG_16969		protein_coding	Putative uncharacterized protein [Source:UniProtKB/TrEMBL%3BAcc:G4N2H2]	broad_genes	G4N2H2	G4N2H2_MAGO7	unreviewed	PKS_ER domain-containing protein	MGG_16969	Magnaporthe oryzae (strain 70-15 / ATCC MYA-4617 / FGSC 8958) (Rice blast fungus) (Pyricularia oryzae)	376			oxidoreductase activity [GO:0016491]; zinc ion binding [GO:0008270]	oxidoreductase activity [GO:0016491]; zinc ion binding [GO:0008270]	GO:0008270; GO:0016491
				3	6295803	6297219	MGG_16970		protein_coding	Putative uncharacterized protein [Source:UniProtKB/TrEMBL%3BAcc:G4N2H3]	broad_genes	G4N2H3	G4N2H3_MAGO7	unreviewed	Uncharacterized protein	MGG_16970	Magnaporthe oryzae (strain 70-15 / ATCC MYA-4617 / FGSC 8958) (Rice blast fungus) (Pyricularia oryzae)	264			oxidoreductase activity [GO:0016491]	oxidoreductase activity [GO:0016491]	GO:0016491
				3	6297508	6298810	MGG_07937		protein_coding	2-dehydropantoate 2-reductase [Source:UniProtKB/TrEMBL%3BAcc:G4N2H4]	broad_genes	G4N2H4	G4N2H4_MAGO7	unreviewed	2-dehydropantoate 2-reductase (EC 1.1.1.169) (Ketopantoate reductase)	MGG_07937	Magnaporthe oryzae (strain 70-15 / ATCC MYA-4617 / FGSC 8958) (Rice blast fungus) (Pyricularia oryzae)	324	pantothenate biosynthetic process [GO:0015940]		2-dehydropantoate 2-reductase activity [GO:0008677]; pantothenate biosynthetic process [GO:0015940]	2-dehydropantoate 2-reductase activity [GO:0008677]	GO:0008677; GO:0015940
				3	6298696	6301519	MGG_13919		protein_coding	Putative uncharacterized protein [Source:UniProtKB/TrEMBL%3BAcc:G4N2H5]	broad_genes	G4N2H5	G4N2H5_MAGO7	unreviewed	Zn(2)-C6 fungal-type domain-containing protein	MGG_13919	Magnaporthe oryzae (strain 70-15 / ATCC MYA-4617 / FGSC 8958) (Rice blast fungus) (Pyricularia oryzae)	782	transcription, DNA-templated [GO:0006351]	nucleus [GO:0005634]	nucleus [GO:0005634]; DNA binding [GO:0003677]; DNA-binding transcription factor activity, RNA polymerase II-specific [GO:0000981]; zinc ion binding [GO:0008270]; transcription, DNA-templated [GO:0006351]	DNA binding [GO:0003677]; DNA-binding transcription factor activity, RNA polymerase II-specific [GO:0000981]; zinc ion binding [GO:0008270]	GO:0000981; GO:0003677; GO:0005634; GO:0006351; GO:0008270
				3	6302020	6303040	MGG_07938		protein_coding	Aldehyde reductase 1 [Source:UniProtKB/TrEMBL%3BAcc:G4N2H6]	broad_genes	G4N2H6	G4N2H6_MAGO7	unreviewed	Aldehyde reductase 1	MGG_07938	Magnaporthe oryzae (strain 70-15 / ATCC MYA-4617 / FGSC 8958) (Rice blast fungus) (Pyricularia oryzae)	324			D-threo-aldose 1-dehydrogenase activity [GO:0047834]	D-threo-aldose 1-dehydrogenase activity [GO:0047834]	GO:0047834
				3	6303818	6307056	MGG_16971		protein_coding	Putative uncharacterized protein [Source:UniProtKB/TrEMBL%3BAcc:G4N2T3]	broad_genes	G4N2T3	G4N2T3_MAGO7	unreviewed	PKS_PP domain-containing protein	MGG_16971	Magnaporthe oryzae (strain 70-15 / ATCC MYA-4617 / FGSC 8958) (Rice blast fungus) (Pyricularia oryzae)	1054			phosphopantetheine binding [GO:0031177]	phosphopantetheine binding [GO:0031177]	GO:0031177
				3	6318551	6320140	MGG_16972		protein_coding	Putative uncharacterized protein [Source:UniProtKB/TrEMBL%3BAcc:G4N2T4]	broad_genes	G4N2T4	G4N2T4_MAGO7	unreviewed	CCHC-type domain-containing protein	MGG_16972	Magnaporthe oryzae (strain 70-15 / ATCC MYA-4617 / FGSC 8958) (Rice blast fungus) (Pyricularia oryzae)	474			nucleic acid binding [GO:0003676]; zinc ion binding [GO:0008270]	nucleic acid binding [GO:0003676]; zinc ion binding [GO:0008270]	GO:0003676; GO:0008270
				3	6357174	6359431	MGG_07949		protein_coding	Putative uncharacterized protein [Source:UniProtKB/TrEMBL%3BAcc:G4N2T5]	broad_genes	G4N2T5	G4N2T5_MAGO7	unreviewed	CDH-cyt domain-containing protein	MGG_07949	Magnaporthe oryzae (strain 70-15 / ATCC MYA-4617 / FGSC 8958) (Rice blast fungus) (Pyricularia oryzae)	292		integral component of membrane [GO:0016021]	integral component of membrane [GO:0016021]		GO:0016021
				3	6360441	6361255	MGG_07950		protein_coding	Putative uncharacterized protein [Source:UniProtKB/TrEMBL%3BAcc:G4N2T6]	broad_genes	G4N2T6	G4N2T6_MAGO7	unreviewed	WSC domain-containing protein	MGG_07950	Magnaporthe oryzae (strain 70-15 / ATCC MYA-4617 / FGSC 8958) (Rice blast fungus) (Pyricularia oryzae)	232
				3	6361636	6362525	MGG_16973		protein_coding	Putative uncharacterized protein [Source:UniProtKB/TrEMBL%3BAcc:G4N2T7]	broad_genes	G4N2T7	G4N2T7_MAGO7	unreviewed	Uncharacterized protein	MGG_16973	Magnaporthe oryzae (strain 70-15 / ATCC MYA-4617 / FGSC 8958) (Rice blast fungus) (Pyricularia oryzae)	82
				3	6363284	6363355	EFMOG00000000074	tRNA-Pseudo	tRNA_pseudogene	tRNA-Pseudo for anticodon GUU [Source:TRNASCAN_SE%3BAcc:tRNA-Pseudo]	ncrna_eg	tRNA-Pseudo
				3	6363506	6363808	MGG_16974		protein_coding	Putative uncharacterized protein [Source:UniProtKB/TrEMBL%3BAcc:G4N2T8]	broad_genes	G4N2T8	G4N2T8_MAGO7	unreviewed	Uncharacterized protein	MGG_16974	Magnaporthe oryzae (strain 70-15 / ATCC MYA-4617 / FGSC 8958) (Rice blast fungus) (Pyricularia oryzae)	37
				3	6365161	6365460	MGG_07952		protein_coding	Putative uncharacterized protein [Source:UniProtKB/TrEMBL%3BAcc:G4N2T9]	broad_genes	G4N2T9	G4N2T9_MAGO7	unreviewed	Uncharacterized protein	MGG_07952	Magnaporthe oryzae (strain 70-15 / ATCC MYA-4617 / FGSC 8958) (Rice blast fungus) (Pyricularia oryzae)	99
				3	6366302	6366883	MGG_13923		protein_coding	Putative uncharacterized protein [Source:UniProtKB/TrEMBL%3BAcc:G4N2U0]	broad_genes	G4N2U0	G4N2U0_MAGO7	unreviewed	Uncharacterized protein	MGG_13923	Magnaporthe oryzae (strain 70-15 / ATCC MYA-4617 / FGSC 8958) (Rice blast fungus) (Pyricularia oryzae)	193
23	IRBLz5-CA_3_5461007	3	5461007	3	5410938	5412698	MGG_05324		protein_coding	Mitochondrial nuclease [Source:UniProtKB/TrEMBL%3BAcc:G4N046]	broad_genes	G4N046	G4N046_MAGO7	unreviewed	Endonuclease (EC 3.1.30.-)	MGG_05324	Magnaporthe oryzae (strain 70-15 / ATCC MYA-4617 / FGSC 8958) (Rice blast fungus) (Pyricularia oryzae)	333			endonuclease activity [GO:0004519]; metal ion binding [GO:0046872]; nucleic acid binding [GO:0003676]	endonuclease activity [GO:0004519]; metal ion binding [GO:0046872]; nucleic acid binding [GO:0003676]	GO:0003676; GO:0004519; GO:0046872
				3	5412391	5415754	MGG_05325		protein_coding	Polyadenylation factor subunit 2 [Source:UniProtKB/TrEMBL%3BAcc:G4N047]	broad_genes	G4N047	G4N047_MAGO7	unreviewed	Polyadenylation factor subunit 2	MGG_05325	Magnaporthe oryzae (strain 70-15 / ATCC MYA-4617 / FGSC 8958) (Rice blast fungus) (Pyricularia oryzae)	655
				3	5417146	5419427	MGG_05326		protein_coding	Sterol O-acyltransferase 2 [Source:UniProtKB/TrEMBL%3BAcc:G4N048]	broad_genes	G4N048	G4N048_MAGO7	unreviewed	O-acyltransferase	MGG_05326	Magnaporthe oryzae (strain 70-15 / ATCC MYA-4617 / FGSC 8958) (Rice blast fungus) (Pyricularia oryzae)	554	triglyceride biosynthetic process [GO:0019432]	endoplasmic reticulum membrane [GO:0005789]; integral component of membrane [GO:0016021]	endoplasmic reticulum membrane [GO:0005789]; integral component of membrane [GO:0016021]; diacylglycerol O-acyltransferase activity [GO:0004144]; triglyceride biosynthetic process [GO:0019432]	diacylglycerol O-acyltransferase activity [GO:0004144]	GO:0004144; GO:0005789; GO:0016021; GO:0019432
				3	5419439	5420271	MGG_05327		protein_coding	Putative uncharacterized protein [Source:UniProtKB/TrEMBL%3BAcc:G4N049]	broad_genes	G4N049	G4N049_MAGO7	unreviewed	Uncharacterized protein	MGG_05327	Magnaporthe oryzae (strain 70-15 / ATCC MYA-4617 / FGSC 8958) (Rice blast fungus) (Pyricularia oryzae)	207
				3	5420678	5423066	MGG_05328		protein_coding	Peroxin 8 [Source:UniProtKB/TrEMBL%3BAcc:G4N050]	broad_genes	G4N050	G4N050_MAGO7	unreviewed	Peroxin 8	MGG_05328	Magnaporthe oryzae (strain 70-15 / ATCC MYA-4617 / FGSC 8958) (Rice blast fungus) (Pyricularia oryzae)	704
				3	5423230	5425021	MGG_05329		protein_coding	Putative uncharacterized protein [Source:UniProtKB/TrEMBL%3BAcc:G4N051]	broad_genes	G4N051	G4N051_MAGO7	unreviewed	Uncharacterized protein	MGG_05329	Magnaporthe oryzae (strain 70-15 / ATCC MYA-4617 / FGSC 8958) (Rice blast fungus) (Pyricularia oryzae)	121		integral component of membrane [GO:0016021]	integral component of membrane [GO:0016021]		GO:0016021
				3	5424781	5425187	MGG_05330		protein_coding	Nodulation protein L [Source:UniProtKB/TrEMBL%3BAcc:G4N052]	broad_genes	G4N052	G4N052_MAGO7	unreviewed	Nodulation protein L	MGG_05330	Magnaporthe oryzae (strain 70-15 / ATCC MYA-4617 / FGSC 8958) (Rice blast fungus) (Pyricularia oryzae)	66			acetyltransferase activity [GO:0016407]	acetyltransferase activity [GO:0016407]	GO:0016407
				3	5425863	5428669	MGG_05331		protein_coding	Protein-S-isoprenylcysteine O-methyltransferase [Source:UniProtKB/TrEMBL%3BAcc:G4N053]	broad_genes	G4N053	G4N053_MAGO7	unreviewed	Protein-S-isoprenylcysteine O-methyltransferase (EC 2.1.1.100)	MGG_05331	Magnaporthe oryzae (strain 70-15 / ATCC MYA-4617 / FGSC 8958) (Rice blast fungus) (Pyricularia oryzae)	268		endoplasmic reticulum membrane [GO:0005789]; integral component of membrane [GO:0016021]	endoplasmic reticulum membrane [GO:0005789]; integral component of membrane [GO:0016021]; protein C-terminal S-isoprenylcysteine carboxyl O-methyltransferase activity [GO:0004671]	protein C-terminal S-isoprenylcysteine carboxyl O-methyltransferase activity [GO:0004671]	GO:0004671; GO:0005789; GO:0016021
				3	5427965	5431132	MGG_05332		protein_coding	1-phosphatidylinositol-4%2C5-bisphosphate phosphodiesterase delta 1 [Source:UniProtKB/TrEMBL%3BAcc:G4N054]	broad_genes	G4N054	G4N054_MAGO7	unreviewed	Phosphoinositide phospholipase C (EC 3.1.4.11)	MGG_05332	Magnaporthe oryzae (strain 70-15 / ATCC MYA-4617 / FGSC 8958) (Rice blast fungus) (Pyricularia oryzae)	706	intracellular signal transduction [GO:0035556]; lipid catabolic process [GO:0016042]		phosphatidylinositol phospholipase C activity [GO:0004435]; intracellular signal transduction [GO:0035556]; lipid catabolic process [GO:0016042]	phosphatidylinositol phospholipase C activity [GO:0004435]	GO:0004435; GO:0016042; GO:0035556	PHI:2018	0	0	loss of pathogenicity
				3	5434367	5435655	MGG_15142		protein_coding	Putative uncharacterized protein [Source:UniProtKB/TrEMBL%3BAcc:G4N055]	broad_genes	G4N055	G4N055_MAGO7	unreviewed	Uncharacterized protein	MGG_15142	Magnaporthe oryzae (strain 70-15 / ATCC MYA-4617 / FGSC 8958) (Rice blast fungus) (Pyricularia oryzae)	281
				3	5436031	5438922	MGG_11100		protein_coding	Putative uncharacterized protein [Source:UniProtKB/TrEMBL%3BAcc:G4N056]	broad_genes	G4N056	G4N056_MAGO7	unreviewed	DUF4484 domain-containing protein	MGG_11100	Magnaporthe oryzae (strain 70-15 / ATCC MYA-4617 / FGSC 8958) (Rice blast fungus) (Pyricularia oryzae)	655
				3	5439426	5443329	MGG_11039		protein_coding	N-acetyltransferase 10 [Source:UniProtKB/TrEMBL%3BAcc:G4N057]	broad_genes	G4N057	G4N057_MAGO7	unreviewed	RNA cytidine acetyltransferase (EC 2.3.1.-) (18S rRNA cytosine acetyltransferase)	NAT10 MGG_11039	Magnaporthe oryzae (strain 70-15 / ATCC MYA-4617 / FGSC 8958) (Rice blast fungus) (Pyricularia oryzae)	1073	mRNA modification [GO:0016556]; ribosomal small subunit biogenesis [GO:0042274]; rRNA modification [GO:0000154]; tRNA acetylation [GO:0051391]	nucleolus [GO:0005730]; preribosome, small subunit precursor [GO:0030688]	nucleolus [GO:0005730]; preribosome, small subunit precursor [GO:0030688]; ATP binding [GO:0005524]; rRNA cytidine N-acetyltransferase activity [GO:1990883]; snoRNA binding [GO:0030515]; tRNA binding [GO:0000049]; mRNA modification [GO:0016556]; ribosomal small subunit biogenesis [GO:0042274]; rRNA modification [GO:0000154]; tRNA acetylation [GO:0051391]	ATP binding [GO:0005524]; rRNA cytidine N-acetyltransferase activity [GO:1990883]; snoRNA binding [GO:0030515]; tRNA binding [GO:0000049]	GO:0000049; GO:0000154; GO:0005524; GO:0005730; GO:0016556; GO:0030515; GO:0030688; GO:0042274; GO:0051391; GO:1990883
				3	5443922	5445811	MGG_11040		protein_coding	1-acyl-sn-glycerol-3-phosphate acyltransferase beta [Source:UniProtKB/TrEMBL%3BAcc:G4N058]	broad_genes	G4N058	G4N058_MAGO7	unreviewed	1-acyl-sn-glycerol-3-phosphate acyltransferase (EC 2.3.1.51)	MGG_11040	Magnaporthe oryzae (strain 70-15 / ATCC MYA-4617 / FGSC 8958) (Rice blast fungus) (Pyricularia oryzae)	303	glycerophospholipid biosynthetic process [GO:0046474]	integral component of membrane [GO:0016021]; lipid droplet [GO:0005811]	integral component of membrane [GO:0016021]; lipid droplet [GO:0005811]; 1-acylglycerol-3-phosphate O-acyltransferase activity [GO:0003841]; glycerophospholipid biosynthetic process [GO:0046474]	1-acylglycerol-3-phosphate O-acyltransferase activity [GO:0003841]	GO:0003841; GO:0005811; GO:0016021; GO:0046474
				3	5446035	5447532	MGG_14463		protein_coding	Putative uncharacterized protein [Source:UniProtKB/TrEMBL%3BAcc:G4N059]	broad_genes	G4N059	G4N059_MAGO7	unreviewed	Uncharacterized protein	MGG_14463	Magnaporthe oryzae (strain 70-15 / ATCC MYA-4617 / FGSC 8958) (Rice blast fungus) (Pyricularia oryzae)	183
				3	5448043	5448114	EFMOG00000000165	tRNA-Pseudo	tRNA_pseudogene	tRNA-Pseudo for anticodon GUU [Source:TRNASCAN_SE%3BAcc:tRNA-Pseudo]	ncrna_eg	tRNA-Pseudo
				3	5448482	5452703	MGG_11036		protein_coding	Cellobiose dehydrogenase [Source:UniProtKB/TrEMBL%3BAcc:G4N060]	broad_genes	G4N060	G4N060_MAGO7	unreviewed	Cellobiose dehydrogenase	MGG_11036	Magnaporthe oryzae (strain 70-15 / ATCC MYA-4617 / FGSC 8958) (Rice blast fungus) (Pyricularia oryzae)	841	carbohydrate metabolic process [GO:0005975]	extracellular region [GO:0005576]	extracellular region [GO:0005576]; cellulose binding [GO:0030248]; flavin adenine dinucleotide binding [GO:0050660]; hydrolase activity [GO:0016787]; oxidoreductase activity, acting on CH-OH group of donors [GO:0016614]; carbohydrate metabolic process [GO:0005975]	cellulose binding [GO:0030248]; flavin adenine dinucleotide binding [GO:0050660]; hydrolase activity [GO:0016787]; oxidoreductase activity, acting on CH-OH group of donors [GO:0016614]	GO:0005576; GO:0005975; GO:0016614; GO:0016787; GO:0030248; GO:0050660
				3	5453776	5454238	MGG_16907		pseudogene		broad_genes
				3	5458254	5459332	MGG_16908		protein_coding	Putative uncharacterized protein [Source:UniProtKB/TrEMBL%3BAcc:G4N062]	broad_genes	G4N062	G4N062_MAGO7	unreviewed	Uncharacterized protein	MGG_16908	Magnaporthe oryzae (strain 70-15 / ATCC MYA-4617 / FGSC 8958) (Rice blast fungus) (Pyricularia oryzae)	237
				3	5465991	5467185	MGG_07702		protein_coding	Fructose-1%2C6-bisphosphatase [Source:UniProtKB/TrEMBL%3BAcc:G4N063]	broad_genes	G4N063	G4N063_MAGO7	unreviewed	Fructose-1,6-bisphosphatase	MGG_07702	Magnaporthe oryzae (strain 70-15 / ATCC MYA-4617 / FGSC 8958) (Rice blast fungus) (Pyricularia oryzae)	334	carbohydrate metabolic process [GO:0005975]		metal ion binding [GO:0046872]; phosphatase activity [GO:0016791]; carbohydrate metabolic process [GO:0005975]	metal ion binding [GO:0046872]; phosphatase activity [GO:0016791]	GO:0005975; GO:0016791; GO:0046872
				3	5467611	5469140	MGG_07703		protein_coding	Putative uncharacterized protein [Source:UniProtKB/TrEMBL%3BAcc:G4N064]	broad_genes	G4N064	G4N064_MAGO7	unreviewed	Uncharacterized protein	MGG_07703	Magnaporthe oryzae (strain 70-15 / ATCC MYA-4617 / FGSC 8958) (Rice blast fungus) (Pyricularia oryzae)	261
				3	5469518	5471429	MGG_07704		protein_coding	Carboxypeptidase A [Source:UniProtKB/TrEMBL%3BAcc:G4N065]	broad_genes	G4N065	G4N065_MAGO7	unreviewed	Carboxypeptidase A	MGG_07704	Magnaporthe oryzae (strain 70-15 / ATCC MYA-4617 / FGSC 8958) (Rice blast fungus) (Pyricularia oryzae)	443			metallocarboxypeptidase activity [GO:0004181]; zinc ion binding [GO:0008270]	metallocarboxypeptidase activity [GO:0004181]; zinc ion binding [GO:0008270]	GO:0004181; GO:0008270
				3	5471840	5479965	MGG_07705		protein_coding	Acyl-CoA ligase [Source:UniProtKB/TrEMBL%3BAcc:G4N066]	broad_genes	G4N066	G4N066_MAGO7	unreviewed	Acyl-CoA ligase	MGG_07705	Magnaporthe oryzae (strain 70-15 / ATCC MYA-4617 / FGSC 8958) (Rice blast fungus) (Pyricularia oryzae)	1833			ligase activity [GO:0016874]	ligase activity [GO:0016874]	GO:0016874
				3	5480722	5483615	MGG_07706		protein_coding	Putative uncharacterized protein [Source:UniProtKB/TrEMBL%3BAcc:G4N067]	broad_genes	G4N067	G4N067_MAGO7	unreviewed	Uncharacterized protein	MGG_07706	Magnaporthe oryzae (strain 70-15 / ATCC MYA-4617 / FGSC 8958) (Rice blast fungus) (Pyricularia oryzae)	364
				3	5484299	5488369	MGG_07707		protein_coding	Putative uncharacterized protein [Source:UniProtKB/TrEMBL%3BAcc:G4N068]	broad_genes	G4N068	G4N068_MAGO7	unreviewed	Uncharacterized protein	MGG_07707	Magnaporthe oryzae (strain 70-15 / ATCC MYA-4617 / FGSC 8958) (Rice blast fungus) (Pyricularia oryzae)	585	cAMP catabolic process [GO:0006198]		3',5'-cyclic-AMP phosphodiesterase activity [GO:0004115]; cAMP catabolic process [GO:0006198]	3',5'-cyclic-AMP phosphodiesterase activity [GO:0004115]	GO:0004115; GO:0006198
				3	5487008	5489609	MGG_07708		protein_coding	Flavoprotein oxygenase [Source:UniProtKB/TrEMBL%3BAcc:G4N069]	broad_genes	G4N069	G4N069_MAGO7	unreviewed	Flavoprotein oxygenase	MGG_07708	Magnaporthe oryzae (strain 70-15 / ATCC MYA-4617 / FGSC 8958) (Rice blast fungus) (Pyricularia oryzae)	352			FMN binding [GO:0010181]	FMN binding [GO:0010181]	GO:0010181
				3	5489697	5492035	MGG_07709		protein_coding	Putative uncharacterized protein [Source:UniProtKB/TrEMBL%3BAcc:G4N070]	broad_genes	G4N070	G4N070_MAGO7	unreviewed	MFS domain-containing protein	MGG_07709	Magnaporthe oryzae (strain 70-15 / ATCC MYA-4617 / FGSC 8958) (Rice blast fungus) (Pyricularia oryzae)	525		integral component of membrane [GO:0016021]	integral component of membrane [GO:0016021]; transmembrane transporter activity [GO:0022857]	transmembrane transporter activity [GO:0022857]	GO:0016021; GO:0022857
				3	5493200	5495124	MGG_07710		protein_coding	Putative uncharacterized protein [Source:UniProtKB/TrEMBL%3BAcc:G4N071]	broad_genes	G4N071	G4N071_MAGO7	unreviewed	Uncharacterized protein	MGG_07710	Magnaporthe oryzae (strain 70-15 / ATCC MYA-4617 / FGSC 8958) (Rice blast fungus) (Pyricularia oryzae)	386
				3	5498178	5500694	MGG_07711		protein_coding	Putative uncharacterized protein [Source:UniProtKB/TrEMBL%3BAcc:G4N072]	broad_genes	G4N072	G4N072_MAGO7	unreviewed	PITH domain-containing protein	MGG_07711	Magnaporthe oryzae (strain 70-15 / ATCC MYA-4617 / FGSC 8958) (Rice blast fungus) (Pyricularia oryzae)	335
				3	5500950	5502099	MGG_07712		protein_coding	Putative uncharacterized protein [Source:UniProtKB/TrEMBL%3BAcc:G4N073]	broad_genes	G4N073	G4N073_MAGO7	unreviewed	J domain-containing protein	MGG_07712	Magnaporthe oryzae (strain 70-15 / ATCC MYA-4617 / FGSC 8958) (Rice blast fungus) (Pyricularia oryzae)	234
				3	5502908	5503918	MGG_07713		protein_coding	Putative uncharacterized protein [Source:UniProtKB/TrEMBL%3BAcc:G4N074]	broad_genes	G4N074	G4N074_MAGO7	unreviewed	Uncharacterized protein	MGG_07713	Magnaporthe oryzae (strain 70-15 / ATCC MYA-4617 / FGSC 8958) (Rice blast fungus) (Pyricularia oryzae)	227
				3	5503822	5507284	MGG_07714		protein_coding	Putative uncharacterized protein [Source:UniProtKB/TrEMBL%3BAcc:G4N075]	broad_genes	G4N075	G4N075_MAGO7	unreviewed	DUF2183 domain-containing protein	MGG_07714	Magnaporthe oryzae (strain 70-15 / ATCC MYA-4617 / FGSC 8958) (Rice blast fungus) (Pyricularia oryzae)	820
				3	5507572	5509258	MGG_07715		protein_coding	Putative uncharacterized protein [Source:UniProtKB/TrEMBL%3BAcc:G4N076]	broad_genes	G4N076	G4N076_MAGO7	unreviewed	GH16 domain-containing protein	MGG_07715	Magnaporthe oryzae (strain 70-15 / ATCC MYA-4617 / FGSC 8958) (Rice blast fungus) (Pyricularia oryzae)	258	carbohydrate metabolic process [GO:0005975]		hydrolase activity, hydrolyzing O-glycosyl compounds [GO:0004553]; carbohydrate metabolic process [GO:0005975]	hydrolase activity, hydrolyzing O-glycosyl compounds [GO:0004553]	GO:0004553; GO:0005975
				3	5509445	5509516	EFMOG00000000309	tRNA-Met	tRNA_pseudogene	tRNA-Met for anticodon CAU [Source:TRNASCAN_SE%3BAcc:tRNA-Met]	ncrna_eg	tRNA-Met
				3	5509445	5509516	ENSRNA049564673	tRNA-Met	tRNA	tRNA-Met for anticodon CAU	trnascan_gene
				3	5510995	5513048	MGG_07716		protein_coding	DnaJ domain-containing protein [Source:UniProtKB/TrEMBL%3BAcc:G4N077]	broad_genes	G4N077	G4N077_MAGO7	unreviewed	DnaJ domain-containing protein	MGG_07716	Magnaporthe oryzae (strain 70-15 / ATCC MYA-4617 / FGSC 8958) (Rice blast fungus) (Pyricularia oryzae)	428		integral component of membrane [GO:0016021]	integral component of membrane [GO:0016021]		GO:0016021
24	IRBLz5-CA_5_54924	5	54924	5	4282	4975	MGG_14388		protein_coding	Putative uncharacterized protein [Source:UniProtKB/TrEMBL%3BAcc:G4NBD3]	broad_genes	G4NBD3	G4NBD3_MAGO7	unreviewed	Uncharacterized protein	MGG_14388	Magnaporthe oryzae (strain 70-15 / ATCC MYA-4617 / FGSC 8958) (Rice blast fungus) (Pyricularia oryzae)	201		integral component of membrane [GO:0016021]	integral component of membrane [GO:0016021]		GO:0016021
				5	10699	12751	MGG_11075		protein_coding	Putative uncharacterized protein [Source:UniProtKB/TrEMBL%3BAcc:G4NBD4]	broad_genes	G4NBD4	G4NBD4_MAGO7	unreviewed	Uncharacterized protein	MGG_11075	Magnaporthe oryzae (strain 70-15 / ATCC MYA-4617 / FGSC 8958) (Rice blast fungus) (Pyricularia oryzae)	538		integral component of membrane [GO:0016021]	integral component of membrane [GO:0016021]; heme binding [GO:0020037]; iron ion binding [GO:0005506]; monooxygenase activity [GO:0004497]; oxidoreductase activity, acting on paired donors, with incorporation or reduction of molecular oxygen [GO:0016705]	heme binding [GO:0020037]; iron ion binding [GO:0005506]; monooxygenase activity [GO:0004497]; oxidoreductase activity, acting on paired donors, with incorporation or reduction of molecular oxygen [GO:0016705]	GO:0004497; GO:0005506; GO:0016021; GO:0016705; GO:0020037
				5	17125	18158	MGG_10913		protein_coding	Retinol dehydrogenase 12 [Source:UniProtKB/TrEMBL%3BAcc:G4NBD5]	broad_genes	G4NBD5	G4NBD5_MAGO7	unreviewed	Retinol dehydrogenase 12	MGG_10913	Magnaporthe oryzae (strain 70-15 / ATCC MYA-4617 / FGSC 8958) (Rice blast fungus) (Pyricularia oryzae)	311			oxidoreductase activity [GO:0016491]	oxidoreductase activity [GO:0016491]	GO:0016491
				5	20327	20635	MGG_10914		protein_coding	Biotrophy-associated secreted protein 4 [Source:UniProtKB/TrEMBL%3BAcc:G5EI20]	broad_genes	G5EI20	BAS4_MAGO7	reviewed	Biotrophy-associated secreted protein 4	BAS4 MGG_10914	Magnaporthe oryzae (strain 70-15 / ATCC MYA-4617 / FGSC 8958) (Rice blast fungus) (Pyricularia oryzae)	102		extracellular region [GO:0005576]	extracellular region [GO:0005576]		GO:0005576
				5	22629	23290	MGG_17289		protein_coding	Putative uncharacterized protein [Source:UniProtKB/TrEMBL%3BAcc:G4NBJ1]	broad_genes	G4NBJ1	G4NBJ1_MAGO7	unreviewed	Uncharacterized protein	MGG_17289	Magnaporthe oryzae (strain 70-15 / ATCC MYA-4617 / FGSC 8958) (Rice blast fungus) (Pyricularia oryzae)	112
				5	25060	27571	MGG_10916		protein_coding	Sugar transporter STL1 [Source:UniProtKB/TrEMBL%3BAcc:G4NBJ2]	broad_genes	G4NBJ2	G4NBJ2_MAGO7	unreviewed	Sugar transporter STL1	MGG_10916	Magnaporthe oryzae (strain 70-15 / ATCC MYA-4617 / FGSC 8958) (Rice blast fungus) (Pyricularia oryzae)	525	carbohydrate transport [GO:0008643]	integral component of membrane [GO:0016021]	integral component of membrane [GO:0016021]; transmembrane transporter activity [GO:0022857]; carbohydrate transport [GO:0008643]	transmembrane transporter activity [GO:0022857]	GO:0008643; GO:0016021; GO:0022857
				5	28920	29237	MGG_17290		protein_coding	Putative uncharacterized protein [Source:UniProtKB/TrEMBL%3BAcc:G4NBJ3]	broad_genes	G4NBJ3	G4NBJ3_MAGO7	unreviewed	Uncharacterized protein	MGG_17290	Magnaporthe oryzae (strain 70-15 / ATCC MYA-4617 / FGSC 8958) (Rice blast fungus) (Pyricularia oryzae)	58
				5	29528	31186	MGG_10917		protein_coding	Putative uncharacterized protein [Source:UniProtKB/TrEMBL%3BAcc:G4NBJ4]	broad_genes	G4NBJ4	G4NBJ4_MAGO7	unreviewed	Uncharacterized protein	MGG_10917	Magnaporthe oryzae (strain 70-15 / ATCC MYA-4617 / FGSC 8958) (Rice blast fungus) (Pyricularia oryzae)	424
				5	31590	31661	EFMOG00000000144	tRNA-Pseudo	tRNA_pseudogene	tRNA-Pseudo for anticodon GUU [Source:TRNASCAN_SE%3BAcc:tRNA-Pseudo]	ncrna_eg	tRNA-Pseudo
				5	32732	33333	MGG_17291		protein_coding	Putative uncharacterized protein [Source:UniProtKB/TrEMBL%3BAcc:G4NBJ5]	broad_genes	G4NBJ5	G4NBJ5_MAGO7	unreviewed	Uncharacterized protein	MGG_17291	Magnaporthe oryzae (strain 70-15 / ATCC MYA-4617 / FGSC 8958) (Rice blast fungus) (Pyricularia oryzae)	128
				5	39582	40105	MGG_17292		protein_coding	Putative uncharacterized protein [Source:UniProtKB/TrEMBL%3BAcc:G4NBJ6]	broad_genes	G4NBJ6	G4NBJ6_MAGO7	unreviewed	Uncharacterized protein	MGG_17292	Magnaporthe oryzae (strain 70-15 / ATCC MYA-4617 / FGSC 8958) (Rice blast fungus) (Pyricularia oryzae)	79
				5	50073	50949	MGG_17293		protein_coding	Putative uncharacterized protein [Source:UniProtKB/TrEMBL%3BAcc:G4NBJ7]	broad_genes	G4NBJ7	G4NBJ7_MAGO7	unreviewed	Uncharacterized protein	MGG_17293	Magnaporthe oryzae (strain 70-15 / ATCC MYA-4617 / FGSC 8958) (Rice blast fungus) (Pyricularia oryzae)	188
				5	54104	54458	MGG_11003		protein_coding	Putative uncharacterized protein [Source:UniProtKB/TrEMBL%3BAcc:G4NBJ8]	broad_genes	G4NBJ8	G4NBJ8_MAGO7	unreviewed	Protein kinase domain-containing protein	MGG_11003	Magnaporthe oryzae (strain 70-15 / ATCC MYA-4617 / FGSC 8958) (Rice blast fungus) (Pyricularia oryzae)	84			ATP binding [GO:0005524]; protein kinase activity [GO:0004672]	ATP binding [GO:0005524]; protein kinase activity [GO:0004672]	GO:0004672; GO:0005524
				5	60324	60992	MGG_11004		protein_coding	Putative uncharacterized protein [Source:UniProtKB/TrEMBL%3BAcc:G4NBJ9]	broad_genes	G4NBJ9	G4NBJ9_MAGO7	unreviewed	Uncharacterized protein	MGG_11004	Magnaporthe oryzae (strain 70-15 / ATCC MYA-4617 / FGSC 8958) (Rice blast fungus) (Pyricularia oryzae)	107
				5	60479	60550	EFMOG00000000072	tRNA-Pseudo	tRNA_pseudogene	tRNA-Pseudo for anticodon GUU [Source:TRNASCAN_SE%3BAcc:tRNA-Pseudo]	ncrna_eg	tRNA-Pseudo
				5	61565	63207	MGG_17294		protein_coding	Putative uncharacterized protein [Source:UniProtKB/TrEMBL%3BAcc:G4NBK0]	broad_genes	G4NBK0	G4NBK0_MAGO7	unreviewed	Uncharacterized protein	MGG_17294	Magnaporthe oryzae (strain 70-15 / ATCC MYA-4617 / FGSC 8958) (Rice blast fungus) (Pyricularia oryzae)	461
				5	66236	66650	MGG_17295		protein_coding	Putative uncharacterized protein [Source:UniProtKB/TrEMBL%3BAcc:G4NBK1]	broad_genes	G4NBK1	G4NBK1_MAGO7	unreviewed	Uncharacterized protein	MGG_17295 MGG_17650	Magnaporthe oryzae (strain 70-15 / ATCC MYA-4617 / FGSC 8958) (Rice blast fungus) (Pyricularia oryzae)	54
				5	68118	69289	MGG_17296		protein_coding	Putative uncharacterized protein [Source:UniProtKB/TrEMBL%3BAcc:G4NBK2]	broad_genes	G4NBK2	G4NBK2_MAGO7	unreviewed	Uncharacterized protein	MGG_17296	Magnaporthe oryzae (strain 70-15 / ATCC MYA-4617 / FGSC 8958) (Rice blast fungus) (Pyricularia oryzae)	168
				5	70543	71895	MGG_10754		protein_coding	Putative uncharacterized protein [Source:UniProtKB/TrEMBL%3BAcc:G4NBK3]	broad_genes	G4NBK3	G4NBK3_MAGO7	unreviewed	Uncharacterized protein	MGG_10754	Magnaporthe oryzae (strain 70-15 / ATCC MYA-4617 / FGSC 8958) (Rice blast fungus) (Pyricularia oryzae)	302
				5	73527	74528	MGG_10755		protein_coding	Alpha/beta hydrolase fold-3 domain-containing protein [Source:UniProtKB/TrEMBL%3BAcc:G4NBK4]	broad_genes	G4NBK4	G4NBK4_MAGO7	unreviewed	Alpha/beta hydrolase fold-3 domain-containing protein	MGG_10755	Magnaporthe oryzae (strain 70-15 / ATCC MYA-4617 / FGSC 8958) (Rice blast fungus) (Pyricularia oryzae)	333			hydrolase activity [GO:0016787]	hydrolase activity [GO:0016787]	GO:0016787
				5	74984	76730	MGG_10756		protein_coding	Putative uncharacterized protein [Source:UniProtKB/TrEMBL%3BAcc:G4NBK5]	broad_genes	G4NBK5	G4NBK5_MAGO7	unreviewed	Uncharacterized protein	MGG_10756	Magnaporthe oryzae (strain 70-15 / ATCC MYA-4617 / FGSC 8958) (Rice blast fungus) (Pyricularia oryzae)	479			acyltransferase activity, transferring groups other than amino-acyl groups [GO:0016747]	acyltransferase activity, transferring groups other than amino-acyl groups [GO:0016747]	GO:0016747
				5	77417	78593	MGG_10757		protein_coding	Putative uncharacterized protein [Source:UniProtKB/TrEMBL%3BAcc:G4NBK6]	broad_genes	G4NBK6	G4NBK6_MAGO7	unreviewed	Uncharacterized protein	MGG_10757	Magnaporthe oryzae (strain 70-15 / ATCC MYA-4617 / FGSC 8958) (Rice blast fungus) (Pyricularia oryzae)	371			acyltransferase activity, transferring groups other than amino-acyl groups [GO:0016747]	acyltransferase activity, transferring groups other than amino-acyl groups [GO:0016747]	GO:0016747
				5	81055	81489	MGG_10759		protein_coding	Putative uncharacterized protein [Source:UniProtKB/TrEMBL%3BAcc:G4NBK7]	broad_genes	G4NBK7	G4NBK7_MAGO7	unreviewed	Uncharacterized protein	MGG_10759	Magnaporthe oryzae (strain 70-15 / ATCC MYA-4617 / FGSC 8958) (Rice blast fungus) (Pyricularia oryzae)	144
				5	81748	82116	MGG_17297		protein_coding	Putative uncharacterized protein [Source:UniProtKB/TrEMBL%3BAcc:G4NBK8]	broad_genes	G4NBK8	G4NBK8_MAGO7	unreviewed	Uncharacterized protein	MGG_17297	Magnaporthe oryzae (strain 70-15 / ATCC MYA-4617 / FGSC 8958) (Rice blast fungus) (Pyricularia oryzae)	122
				5	82474	84249	MGG_10760		protein_coding	FAD-binding domain-containing protein [Source:UniProtKB/TrEMBL%3BAcc:G4NBK9]	broad_genes	G4NBK9	G4NBK9_MAGO7	unreviewed	FAD-binding domain-containing protein	MGG_10760	Magnaporthe oryzae (strain 70-15 / ATCC MYA-4617 / FGSC 8958) (Rice blast fungus) (Pyricularia oryzae)	415		integral component of membrane [GO:0016021]	integral component of membrane [GO:0016021]; oxidoreductase activity [GO:0016491]	oxidoreductase activity [GO:0016491]	GO:0016021; GO:0016491
				5	84277	84936	MGG_17298		pseudogene		broad_genes
				5	85809	87519	MGG_15435		protein_coding	Putative uncharacterized protein [Source:UniProtKB/TrEMBL%3BAcc:G4NBL1]	broad_genes	G4NBL1	G4NBL1_MAGO7	unreviewed	Uncharacterized protein	MGG_15435	Magnaporthe oryzae (strain 70-15 / ATCC MYA-4617 / FGSC 8958) (Rice blast fungus) (Pyricularia oryzae)	510		integral component of membrane [GO:0016021]	integral component of membrane [GO:0016021]; transmembrane transporter activity [GO:0022857]	transmembrane transporter activity [GO:0022857]	GO:0016021; GO:0022857
				5	89326	89793	MGG_17299		protein_coding	Putative uncharacterized protein [Source:UniProtKB/TrEMBL%3BAcc:G4NBL2]	broad_genes	G4NBL2	G4NBL2_MAGO7	unreviewed	Chromo domain-containing protein	MGG_17299	Magnaporthe oryzae (strain 70-15 / ATCC MYA-4617 / FGSC 8958) (Rice blast fungus) (Pyricularia oryzae)	155
				5	91417	91488	EFMOG00000000199	tRNA-Pseudo	tRNA_pseudogene	tRNA-Pseudo for anticodon GUU [Source:TRNASCAN_SE%3BAcc:tRNA-Pseudo]	ncrna_eg	tRNA-Pseudo
				5	92196	93600	MGG_17300		protein_coding	Putative uncharacterized protein [Source:UniProtKB/TrEMBL%3BAcc:G4NBL3]	broad_genes	G4NBL3	G4NBL3_MAGO7	unreviewed	Uncharacterized protein	MGG_17300	Magnaporthe oryzae (strain 70-15 / ATCC MYA-4617 / FGSC 8958) (Rice blast fungus) (Pyricularia oryzae)	236
				5	96588	97601	MGG_10764		protein_coding	Putative uncharacterized protein [Source:UniProtKB/TrEMBL%3BAcc:G4NBL4]	broad_genes	G4NBL4	G4NBL4_MAGO7	unreviewed	Uncharacterized protein	MGG_10764	Magnaporthe oryzae (strain 70-15 / ATCC MYA-4617 / FGSC 8958) (Rice blast fungus) (Pyricularia oryzae)	302			metal ion binding [GO:0046872]	metal ion binding [GO:0046872]	GO:0046872
				5	99134	101457	MGG_10766		protein_coding	Putative uncharacterized protein [Source:UniProtKB/TrEMBL%3BAcc:G4NBL5]	broad_genes	G4NBL5	G4NBL5_MAGO7	unreviewed	Uncharacterized protein	MGG_10766	Magnaporthe oryzae (strain 70-15 / ATCC MYA-4617 / FGSC 8958) (Rice blast fungus) (Pyricularia oryzae)	530
				5	102263	102511	MGG_17301		protein_coding	Putative uncharacterized protein [Source:UniProtKB/TrEMBL%3BAcc:G4NBL6]	broad_genes	G4NBL6	HTR10_MAGO7	reviewed	Host transcription reprogramming factor 10 (Secreted nuclear effector HTR10)	HTR10 MGG_17301	Magnaporthe oryzae (strain 70-15 / ATCC MYA-4617 / FGSC 8958) (Rice blast fungus) (Pyricularia oryzae)	82		extracellular region [GO:0005576]; host cell nucleus [GO:0042025]	extracellular region [GO:0005576]; host cell nucleus [GO:0042025]; metal ion binding [GO:0046872]	metal ion binding [GO:0046872]	GO:0005576; GO:0042025; GO:0046872
				5	104085	105894	MGG_17302		protein_coding	Putative uncharacterized protein [Source:UniProtKB/TrEMBL%3BAcc:G4NBL7]	broad_genes	G4NBL7	G4NBL7_MAGO7	unreviewed	Glyco_hydro_32C domain-containing protein	MGG_17302	Magnaporthe oryzae (strain 70-15 / ATCC MYA-4617 / FGSC 8958) (Rice blast fungus) (Pyricularia oryzae)	456	metabolic process [GO:0008152]		hydrolase activity, acting on glycosyl bonds [GO:0016798]; metabolic process [GO:0008152]	hydrolase activity, acting on glycosyl bonds [GO:0016798]	GO:0008152; GO:0016798
25	IRBLz5-CA_6_957987	6	957987	6	910167	910793	MGG_14965		protein_coding	Putative uncharacterized protein [Source:UniProtKB/TrEMBL%3BAcc:G4NG85]	broad_genes	G4NG85	G4NG85_MAGO7	unreviewed	Uncharacterized protein	MGG_14965 MGG_16489	Magnaporthe oryzae (strain 70-15 / ATCC MYA-4617 / FGSC 8958) (Rice blast fungus) (Pyricularia oryzae)	208
				6	917140	918743	MGG_17615		protein_coding	Putative uncharacterized protein [Source:UniProtKB/TrEMBL%3BAcc:G4NG86]	broad_genes	G4NG86	G4NG86_MAGO7	unreviewed	Chromo domain-containing protein	MGG_17615	Magnaporthe oryzae (strain 70-15 / ATCC MYA-4617 / FGSC 8958) (Rice blast fungus) (Pyricularia oryzae)	351
				6	919221	921143	MGG_17616		protein_coding	Putative uncharacterized protein [Source:UniProtKB/TrEMBL%3BAcc:G4NG87]	broad_genes	G4NG87	G4NG87_MAGO7	unreviewed	Uncharacterized protein	MGG_17616	Magnaporthe oryzae (strain 70-15 / ATCC MYA-4617 / FGSC 8958) (Rice blast fungus) (Pyricularia oryzae)	460			DNA binding [GO:0003677]	DNA binding [GO:0003677]	GO:0003677
				6	923170	923241	EFMOG00000000136	tRNA-Pseudo	tRNA_pseudogene	tRNA-Pseudo for anticodon GUU [Source:TRNASCAN_SE%3BAcc:tRNA-Pseudo]	ncrna_eg	tRNA-Pseudo
				6	923633	925312	MGG_10392		protein_coding	CMGC/SRPK protein kinase [Source:UniProtKB/TrEMBL%3BAcc:G4NG88]	broad_genes	G4NG88	G4NG88_MAGO7	unreviewed	CMGC/SRPK protein kinase	MGG_10392	Magnaporthe oryzae (strain 70-15 / ATCC MYA-4617 / FGSC 8958) (Rice blast fungus) (Pyricularia oryzae)	466			ATP binding [GO:0005524]; protein kinase activity [GO:0004672]	ATP binding [GO:0005524]; protein kinase activity [GO:0004672]	GO:0004672; GO:0005524
				6	926934	928736	MGG_12231		protein_coding	Allantoate permease [Source:UniProtKB/TrEMBL%3BAcc:G4NG89]	broad_genes	G4NG89	G4NG89_MAGO7	unreviewed	Allantoate permease	MGG_12231	Magnaporthe oryzae (strain 70-15 / ATCC MYA-4617 / FGSC 8958) (Rice blast fungus) (Pyricularia oryzae)	497		integral component of membrane [GO:0016021]	integral component of membrane [GO:0016021]; transmembrane transporter activity [GO:0022857]	transmembrane transporter activity [GO:0022857]	GO:0016021; GO:0022857
				6	929022	929820	MGG_12230		protein_coding	Putative uncharacterized protein [Source:UniProtKB/TrEMBL%3BAcc:G4NG90]	broad_genes	G4NG90	G4NG90_MAGO7	unreviewed	Uncharacterized protein	MGG_12230	Magnaporthe oryzae (strain 70-15 / ATCC MYA-4617 / FGSC 8958) (Rice blast fungus) (Pyricularia oryzae)	112
				6	929931	931640	MGG_10394		protein_coding	Putative uncharacterized protein [Source:UniProtKB/TrEMBL%3BAcc:G4NG91]	broad_genes	G4NG91	G4NG91_MAGO7	unreviewed	Uncharacterized protein	MGG_10394	Magnaporthe oryzae (strain 70-15 / ATCC MYA-4617 / FGSC 8958) (Rice blast fungus) (Pyricularia oryzae)	203
				6	933280	935531	MGG_17617		protein_coding	Putative uncharacterized protein [Source:UniProtKB/TrEMBL%3BAcc:G4NG92]	broad_genes	G4NG92	G4NG92_MAGO7	unreviewed	MFS domain-containing protein	MGG_17617	Magnaporthe oryzae (strain 70-15 / ATCC MYA-4617 / FGSC 8958) (Rice blast fungus) (Pyricularia oryzae)	527		integral component of membrane [GO:0016021]	integral component of membrane [GO:0016021]; transmembrane transporter activity [GO:0022857]	transmembrane transporter activity [GO:0022857]	GO:0016021; GO:0022857
				6	935468	937180	MGG_17618		protein_coding	Putative uncharacterized protein [Source:UniProtKB/TrEMBL%3BAcc:G4NG93]	broad_genes	G4NG93	G4NG93_MAGO7	unreviewed	Uncharacterized protein	MGG_17618	Magnaporthe oryzae (strain 70-15 / ATCC MYA-4617 / FGSC 8958) (Rice blast fungus) (Pyricularia oryzae)	297			oxidoreductase activity [GO:0016491]	oxidoreductase activity [GO:0016491]	GO:0016491
				6	938203	939455	MGG_12228		protein_coding	Putative uncharacterized protein [Source:UniProtKB/TrEMBL%3BAcc:G4NG94]	broad_genes	G4NG94	G4NG94_MAGO7	unreviewed	PKS_ER domain-containing protein	MGG_12228	Magnaporthe oryzae (strain 70-15 / ATCC MYA-4617 / FGSC 8958) (Rice blast fungus) (Pyricularia oryzae)	356			oxidoreductase activity [GO:0016491]	oxidoreductase activity [GO:0016491]	GO:0016491
				6	946701	948412	MGG_10400		protein_coding	GPI-anchored cell wall beta-1%2C3-endoglucanase EglC [Source:UniProtKB/TrEMBL%3BAcc:G4NG95]	broad_genes	G4NG95	G4NG95_MAGO7	unreviewed	GPI-anchored cell wall beta-1,3-endoglucanase EglC	MGG_10400	Magnaporthe oryzae (strain 70-15 / ATCC MYA-4617 / FGSC 8958) (Rice blast fungus) (Pyricularia oryzae)	310	carbohydrate metabolic process [GO:0005975]	cell wall [GO:0005618]	cell wall [GO:0005618]; hydrolase activity, hydrolyzing O-glycosyl compounds [GO:0004553]; carbohydrate metabolic process [GO:0005975]	hydrolase activity, hydrolyzing O-glycosyl compounds [GO:0004553]	GO:0004553; GO:0005618; GO:0005975
				6	949267	950292	MGG_10401		protein_coding	Putative uncharacterized protein [Source:UniProtKB/TrEMBL%3BAcc:G4NG96]	broad_genes	G4NG96	G4NG96_MAGO7	unreviewed	Uncharacterized protein	MGG_10401	Magnaporthe oryzae (strain 70-15 / ATCC MYA-4617 / FGSC 8958) (Rice blast fungus) (Pyricularia oryzae)	274
				6	951306	953264	MGG_10402		protein_coding	Putative uncharacterized protein [Source:UniProtKB/TrEMBL%3BAcc:A4R5X9]	broad_genes	A4R5X9	A4R5X9_MAGO7	unreviewed	Uncharacterized protein	MGG_10402	Magnaporthe oryzae (strain 70-15 / ATCC MYA-4617 / FGSC 8958) (Rice blast fungus) (Pyricularia oryzae)	526		integral component of membrane [GO:0016021]	integral component of membrane [GO:0016021]		GO:0016021
				6	954603	955474	MGG_17619		protein_coding	Putative uncharacterized protein [Source:UniProtKB/TrEMBL%3BAcc:G4NG98]	broad_genes	G4NG98	G4NG98_MAGO7	unreviewed	Uncharacterized protein	MGG_17619	Magnaporthe oryzae (strain 70-15 / ATCC MYA-4617 / FGSC 8958) (Rice blast fungus) (Pyricularia oryzae)	177
				6	955647	955718	EFMOG00000000078	tRNA-Pseudo	tRNA_pseudogene	tRNA-Pseudo for anticodon GUU [Source:TRNASCAN_SE%3BAcc:tRNA-Pseudo]	ncrna_eg	tRNA-Pseudo
				6	960893	963401	MGG_17620		protein_coding	Putative uncharacterized protein [Source:UniProtKB/TrEMBL%3BAcc:G4NG99]	broad_genes	G4NG99	G4NG99_MAGO7	unreviewed	CCHC-type domain-containing protein	MGG_17620	Magnaporthe oryzae (strain 70-15 / ATCC MYA-4617 / FGSC 8958) (Rice blast fungus) (Pyricularia oryzae)	699			nucleic acid binding [GO:0003676]; zinc ion binding [GO:0008270]	nucleic acid binding [GO:0003676]; zinc ion binding [GO:0008270]	GO:0003676; GO:0008270
				6	965851	966358	MGG_17621		protein_coding	Putative uncharacterized protein [Source:UniProtKB/TrEMBL%3BAcc:G4NGA0]	broad_genes	G4NGA0	G4NGA0_MAGO7	unreviewed	Uncharacterized protein	MGG_17621	Magnaporthe oryzae (strain 70-15 / ATCC MYA-4617 / FGSC 8958) (Rice blast fungus) (Pyricularia oryzae)	100
				6	967077	968869	MGG_10407		protein_coding	Putative uncharacterized protein [Source:UniProtKB/TrEMBL%3BAcc:G4NGA1]	broad_genes	G4NGA1	G4NGA1_MAGO7	unreviewed	Uncharacterized protein	MGG_10407	Magnaporthe oryzae (strain 70-15 / ATCC MYA-4617 / FGSC 8958) (Rice blast fungus) (Pyricularia oryzae)	385		integral component of membrane [GO:0016021]	integral component of membrane [GO:0016021]		GO:0016021
				6	971566	973252	MGG_10408		protein_coding	FAD binding domain-containing protein [Source:UniProtKB/TrEMBL%3BAcc:G4NGA2]	broad_genes	G4NGA2	G4NGA2_MAGO7	unreviewed	FAD binding domain-containing protein	MGG_10408	Magnaporthe oryzae (strain 70-15 / ATCC MYA-4617 / FGSC 8958) (Rice blast fungus) (Pyricularia oryzae)	500			FAD binding [GO:0071949]; oxidoreductase activity [GO:0016491]	FAD binding [GO:0071949]; oxidoreductase activity [GO:0016491]	GO:0016491; GO:0071949
				6	974128	975480	MGG_10409		protein_coding	Putative uncharacterized protein [Source:UniProtKB/TrEMBL%3BAcc:G4NGA3]	broad_genes	G4NGA3	G4NGA3_MAGO7	unreviewed	Uncharacterized protein	MGG_10409	Magnaporthe oryzae (strain 70-15 / ATCC MYA-4617 / FGSC 8958) (Rice blast fungus) (Pyricularia oryzae)	363		integral component of membrane [GO:0016021]	integral component of membrane [GO:0016021]		GO:0016021
				6	975430	980469	MGG_10410		protein_coding	Pleiotropic drug resistance protein 1 [Source:UniProtKB/TrEMBL%3BAcc:G4NGA4]	broad_genes	G4NGA4	G4NGA4_MAGO7	unreviewed	Pleiotropic drug resistance protein 1	MGG_10410	Magnaporthe oryzae (strain 70-15 / ATCC MYA-4617 / FGSC 8958) (Rice blast fungus) (Pyricularia oryzae)	1412		integral component of membrane [GO:0016021]	integral component of membrane [GO:0016021]; ATP binding [GO:0005524]; ATPase-coupled transmembrane transporter activity [GO:0042626]	ATPase-coupled transmembrane transporter activity [GO:0042626]; ATP binding [GO:0005524]	GO:0005524; GO:0016021; GO:0042626
				6	984616	987741	MGG_10412		protein_coding	Allantoinase [Source:UniProtKB/TrEMBL%3BAcc:G4NGA5]	broad_genes	G4NGA5	G4NGA5_MAGO7	unreviewed	Allantoinase	MGG_10412	Magnaporthe oryzae (strain 70-15 / ATCC MYA-4617 / FGSC 8958) (Rice blast fungus) (Pyricularia oryzae)	550	allantoin assimilation pathway [GO:0009442]		allantoinase activity [GO:0004038]; endodeoxyribonuclease activity, producing 5'-phosphomonoesters [GO:0016888]; metal ion binding [GO:0046872]; allantoin assimilation pathway [GO:0009442]	allantoinase activity [GO:0004038]; endodeoxyribonuclease activity, producing 5'-phosphomonoesters [GO:0016888]; metal ion binding [GO:0046872]	GO:0004038; GO:0009442; GO:0016888; GO:0046872
				6	988085	990181	MGG_10413		protein_coding	NADP-dependent leukotriene B4 12-hydroxydehydrogenase [Source:UniProtKB/TrEMBL%3BAcc:G4NGA6]	broad_genes	G4NGA6	G4NGA6_MAGO7	unreviewed	NADP-dependent leukotriene B4 12-hydroxydehydrogenase	MGG_10413	Magnaporthe oryzae (strain 70-15 / ATCC MYA-4617 / FGSC 8958) (Rice blast fungus) (Pyricularia oryzae)	354
				6	990336	992399	MGG_10414		protein_coding	Cholinesterase [Source:UniProtKB/TrEMBL%3BAcc:G4NGA7]	broad_genes	G4NGA7	G4NGA7_MAGO7	unreviewed	Carboxylic ester hydrolase (EC 3.1.1.-)	MGG_10414	Magnaporthe oryzae (strain 70-15 / ATCC MYA-4617 / FGSC 8958) (Rice blast fungus) (Pyricularia oryzae)	536			hydrolase activity [GO:0016787]	hydrolase activity [GO:0016787]	GO:0016787
				6	993749	996151	MGG_10415		protein_coding	Putative uncharacterized protein [Source:UniProtKB/TrEMBL%3BAcc:G4NGA8]	broad_genes	G4NGA8	G4NGA8_MAGO7	unreviewed	F-box domain-containing protein	MGG_10415	Magnaporthe oryzae (strain 70-15 / ATCC MYA-4617 / FGSC 8958) (Rice blast fungus) (Pyricularia oryzae)	800
				6	996239	997972	MGG_12222		protein_coding	F-box domain-containing protein [Source:UniProtKB/TrEMBL%3BAcc:G4NGA9]	broad_genes	G4NGA9	G4NGA9_MAGO7	unreviewed	F-box domain-containing protein	MGG_12222	Magnaporthe oryzae (strain 70-15 / ATCC MYA-4617 / FGSC 8958) (Rice blast fungus) (Pyricularia oryzae)	472
				6	998316	1000212	MGG_17622		protein_coding	Putative uncharacterized protein [Source:UniProtKB/TrEMBL%3BAcc:G4NGB0]	broad_genes	G4NGB0	G4NGB0_MAGO7	unreviewed	MFS domain-containing protein	MGG_17622	Magnaporthe oryzae (strain 70-15 / ATCC MYA-4617 / FGSC 8958) (Rice blast fungus) (Pyricularia oryzae)	506		integral component of membrane [GO:0016021]	integral component of membrane [GO:0016021]; transmembrane transporter activity [GO:0022857]	transmembrane transporter activity [GO:0022857]	GO:0016021; GO:0022857
				6	1000199	1002969	MGG_17623		protein_coding	Putative uncharacterized protein [Source:UniProtKB/TrEMBL%3BAcc:G4NGB1]	broad_genes	G4NGB1	G4NGB1_MAGO7	unreviewed	Zn(2)-C6 fungal-type domain-containing protein	MGG_17623	Magnaporthe oryzae (strain 70-15 / ATCC MYA-4617 / FGSC 8958) (Rice blast fungus) (Pyricularia oryzae)	656		nucleus [GO:0005634]	nucleus [GO:0005634]; DNA-binding transcription factor activity, RNA polymerase II-specific [GO:0000981]; zinc ion binding [GO:0008270]	DNA-binding transcription factor activity, RNA polymerase II-specific [GO:0000981]; zinc ion binding [GO:0008270]	GO:0000981; GO:0005634; GO:0008270	PHI:5661	Zn2Cys6 transcription factor	0	reduced virulence
				6	1005752	1006078	MGG_10418		protein_coding	Putative uncharacterized protein [Source:UniProtKB/TrEMBL%3BAcc:G4NGB2]	broad_genes	G4NGB2	G4NGB2_MAGO7	unreviewed	Uncharacterized protein	MGG_10418	Magnaporthe oryzae (strain 70-15 / ATCC MYA-4617 / FGSC 8958) (Rice blast fungus) (Pyricularia oryzae)	108
26	IRBLz5-CA_6_703373	6	703373	6	654040	655694	MGG_01918		protein_coding	Amidase [Source:UniProtKB/TrEMBL%3BAcc:G4NG19]	broad_genes	G4NG19	G4NG19_MAGO7	unreviewed	Amidase	MGG_01918	Magnaporthe oryzae (strain 70-15 / ATCC MYA-4617 / FGSC 8958) (Rice blast fungus) (Pyricularia oryzae)	528			hydrolase activity [GO:0016787]	hydrolase activity [GO:0016787]	GO:0016787
				6	656616	657359	MGG_01917		protein_coding	DNA replication complex GINS protein PSF2 [Source:UniProtKB/TrEMBL%3BAcc:G4NG20]	broad_genes	G4NG20	G4NG20_MAGO7	unreviewed	DNA replication complex GINS protein PSF2	MGG_01917	Magnaporthe oryzae (strain 70-15 / ATCC MYA-4617 / FGSC 8958) (Rice blast fungus) (Pyricularia oryzae)	247	chromosome segregation [GO:0007059]; DNA replication [GO:0006260]	nucleus [GO:0005634]	nucleus [GO:0005634]; chromosome segregation [GO:0007059]; DNA replication [GO:0006260]		GO:0005634; GO:0006260; GO:0007059
				6	658162	659859	MGG_01916		protein_coding	Putative uncharacterized protein [Source:UniProtKB/TrEMBL%3BAcc:G4NG21]	broad_genes	G4NG21	G4NG21_MAGO7	unreviewed	Uncharacterized protein	MGG_01916	Magnaporthe oryzae (strain 70-15 / ATCC MYA-4617 / FGSC 8958) (Rice blast fungus) (Pyricularia oryzae)	565
				6	661294	662148	MGG_01914		protein_coding	Putative uncharacterized protein [Source:UniProtKB/TrEMBL%3BAcc:G4NG22]	broad_genes	G4NG22	G4NG22_MAGO7	unreviewed	Uncharacterized protein	MGG_01914	Magnaporthe oryzae (strain 70-15 / ATCC MYA-4617 / FGSC 8958) (Rice blast fungus) (Pyricularia oryzae)	284		integral component of membrane [GO:0016021]	integral component of membrane [GO:0016021]		GO:0016021
				6	662917	663759	MGG_17594		protein_coding	Putative uncharacterized protein [Source:UniProtKB/TrEMBL%3BAcc:G4NG23]	broad_genes	G4NG23	G4NG23_MAGO7	unreviewed	Uncharacterized protein	MGG_17594	Magnaporthe oryzae (strain 70-15 / ATCC MYA-4617 / FGSC 8958) (Rice blast fungus) (Pyricularia oryzae)	224		integral component of membrane [GO:0016021]	integral component of membrane [GO:0016021]		GO:0016021
				6	664321	667059	MGG_01912		protein_coding	Beta-glucosidase 1 [Source:UniProtKB/TrEMBL%3BAcc:G4NG24]	broad_genes	G4NG24	G4NG24_MAGO7	unreviewed	Beta-glucosidase (EC 3.2.1.21)	MGG_01912	Magnaporthe oryzae (strain 70-15 / ATCC MYA-4617 / FGSC 8958) (Rice blast fungus) (Pyricularia oryzae)	810	cellulose catabolic process [GO:0030245]		beta-glucosidase activity [GO:0008422]; scopolin beta-glucosidase activity [GO:0102483]; cellulose catabolic process [GO:0030245]	beta-glucosidase activity [GO:0008422]; scopolin beta-glucosidase activity [GO:0102483]	GO:0008422; GO:0030245; GO:0102483
				6	667241	667352	EFMOG00000000110	tRNA-Leu	tRNA_pseudogene	tRNA-Leu for anticodon CAG [Source:TRNASCAN_SE%3BAcc:tRNA-Leu]	ncrna_eg	tRNA-Leu
				6	667241	667352	ENSRNA049565376	tRNA-Leu	tRNA	tRNA-Leu for anticodon CAG	trnascan_gene
				6	669805	670679	MGG_01910		protein_coding	Putative uncharacterized protein [Source:UniProtKB/TrEMBL%3BAcc:G4NG25]	broad_genes	G4NG25	G4NG25_MAGO7	unreviewed	Uncharacterized protein	MGG_01910	Magnaporthe oryzae (strain 70-15 / ATCC MYA-4617 / FGSC 8958) (Rice blast fungus) (Pyricularia oryzae)	288		integral component of membrane [GO:0016021]	integral component of membrane [GO:0016021]		GO:0016021
				6	671228	672340	MGG_01909		protein_coding	Putative uncharacterized protein [Source:UniProtKB/TrEMBL%3BAcc:G4NG26]	broad_genes	G4NG26	G4NG26_MAGO7	unreviewed	Rhodanese domain-containing protein	MGG_01909	Magnaporthe oryzae (strain 70-15 / ATCC MYA-4617 / FGSC 8958) (Rice blast fungus) (Pyricularia oryzae)	157
				6	673175	675032	MGG_17595		protein_coding	Putative uncharacterized protein [Source:UniProtKB/TrEMBL%3BAcc:G4NG27]	broad_genes	G4NG27	G4NG27_MAGO7	unreviewed	DAO domain-containing protein	MGG_17595	Magnaporthe oryzae (strain 70-15 / ATCC MYA-4617 / FGSC 8958) (Rice blast fungus) (Pyricularia oryzae)	509			oxidoreductase activity [GO:0016491]	oxidoreductase activity [GO:0016491]	GO:0016491
				6	675025	676774	MGG_17596		protein_coding	Putative uncharacterized protein [Source:UniProtKB/TrEMBL%3BAcc:G4NG28]	broad_genes	G4NG28	G4NG28_MAGO7	unreviewed	tRNA-binding domain-containing protein	MGG_17596	Magnaporthe oryzae (strain 70-15 / ATCC MYA-4617 / FGSC 8958) (Rice blast fungus) (Pyricularia oryzae)	404			tRNA binding [GO:0000049]	tRNA binding [GO:0000049]	GO:0000049
				6	678866	680344	MGG_01906		protein_coding	Nicotianamine synthase 3 [Source:UniProtKB/TrEMBL%3BAcc:G4NG29]	broad_genes	G4NG29	G4NG29_MAGO7	unreviewed	Nicotianamine synthase 3	MGG_01906	Magnaporthe oryzae (strain 70-15 / ATCC MYA-4617 / FGSC 8958) (Rice blast fungus) (Pyricularia oryzae)	321	nicotianamine biosynthetic process [GO:0030418]		nicotianamine synthase activity [GO:0030410]; nicotianamine biosynthetic process [GO:0030418]	nicotianamine synthase activity [GO:0030410]	GO:0030410; GO:0030418
				6	685569	687104	MGG_01905		protein_coding	Putative uncharacterized protein [Source:UniProtKB/TrEMBL%3BAcc:G4NG30]	broad_genes	G4NG30	G4NG30_MAGO7	unreviewed	Uncharacterized protein	MGG_01905	Magnaporthe oryzae (strain 70-15 / ATCC MYA-4617 / FGSC 8958) (Rice blast fungus) (Pyricularia oryzae)	367		integral component of membrane [GO:0016021]	integral component of membrane [GO:0016021]		GO:0016021
				6	690120	690575	MGG_01904		protein_coding	Putative uncharacterized protein [Source:UniProtKB/TrEMBL%3BAcc:G4NG31]	broad_genes	G4NG31	G4NG31_MAGO7	unreviewed	Uncharacterized protein	MGG_01904	Magnaporthe oryzae (strain 70-15 / ATCC MYA-4617 / FGSC 8958) (Rice blast fungus) (Pyricularia oryzae)	151
				6	690722	691929	MGG_01903		protein_coding	Alpha/beta hydrolase [Source:UniProtKB/TrEMBL%3BAcc:G4NG32]	broad_genes	G4NG32	G4NG32_MAGO7	unreviewed	Alpha/beta hydrolase	MGG_01903	Magnaporthe oryzae (strain 70-15 / ATCC MYA-4617 / FGSC 8958) (Rice blast fungus) (Pyricularia oryzae)	300			hydrolase activity [GO:0016787]	hydrolase activity [GO:0016787]	GO:0016787
				6	692073	692946	MGG_15364		protein_coding	Putative uncharacterized protein [Source:UniProtKB/TrEMBL%3BAcc:G4NG37]	broad_genes	G4NG37	G4NG37_MAGO7	unreviewed	Uncharacterized protein	MGG_15364	Magnaporthe oryzae (strain 70-15 / ATCC MYA-4617 / FGSC 8958) (Rice blast fungus) (Pyricularia oryzae)	178
				6	693804	694086	MGG_17597		protein_coding	Putative uncharacterized protein [Source:UniProtKB/TrEMBL%3BAcc:G4NG38]	broad_genes	G4NG38	G4NG38_MAGO7	unreviewed	Uncharacterized protein	MGG_17597	Magnaporthe oryzae (strain 70-15 / ATCC MYA-4617 / FGSC 8958) (Rice blast fungus) (Pyricularia oryzae)	55
				6	709880	710342	MGG_17598		pseudogene		broad_genes
				6	711497	711959	MGG_17599		pseudogene		broad_genes
				6	718592	719054	MGG_17600		pseudogene		broad_genes
				6	737675	738034	MGG_17601		protein_coding	Putative uncharacterized protein [Source:UniProtKB/TrEMBL%3BAcc:G4NG36]	broad_genes	G4NG36	G4NG36_MAGO7	unreviewed	Uncharacterized protein	MGG_17601	Magnaporthe oryzae (strain 70-15 / ATCC MYA-4617 / FGSC 8958) (Rice blast fungus) (Pyricularia oryzae)	119
				6	740828	741184	MGG_14287		protein_coding	Putative uncharacterized protein [Source:UniProtKB/TrEMBL%3BAcc:G4NG39]	broad_genes	G4NG39	G4NG39_MAGO7	unreviewed	Uncharacterized protein	MGG_14287	Magnaporthe oryzae (strain 70-15 / ATCC MYA-4617 / FGSC 8958) (Rice blast fungus) (Pyricularia oryzae)	118
				6	742201	742875	MGG_14288		protein_coding	Putative uncharacterized protein [Source:UniProtKB/TrEMBL%3BAcc:G4NG40]	broad_genes	G4NG40	G4NG40_MAGO7	unreviewed	KR domain-containing protein	MGG_14288	Magnaporthe oryzae (strain 70-15 / ATCC MYA-4617 / FGSC 8958) (Rice blast fungus) (Pyricularia oryzae)	224
				6	744042	745515	MGG_10881		protein_coding	Putative uncharacterized protein [Source:UniProtKB/TrEMBL%3BAcc:G4NG41]	broad_genes	G4NG41	G4NG41_MAGO7	unreviewed	MFS domain-containing protein	MGG_10881	Magnaporthe oryzae (strain 70-15 / ATCC MYA-4617 / FGSC 8958) (Rice blast fungus) (Pyricularia oryzae)	428		integral component of membrane [GO:0016021]	integral component of membrane [GO:0016021]; transmembrane transporter activity [GO:0022857]	transmembrane transporter activity [GO:0022857]	GO:0016021; GO:0022857
				6	747984	748424	MGG_17602		protein_coding	Putative uncharacterized protein [Source:UniProtKB/TrEMBL%3BAcc:G4NG42]	broad_genes	G4NG42	G4NG42_MAGO7	unreviewed	Uncharacterized protein	MGG_17602	Magnaporthe oryzae (strain 70-15 / ATCC MYA-4617 / FGSC 8958) (Rice blast fungus) (Pyricularia oryzae)	146
				6	749653	749753	EFMOG00000000066	tRNA-Ser	tRNA_pseudogene	tRNA-Ser for anticodon GCU [Source:TRNASCAN_SE%3BAcc:tRNA-Ser]	ncrna_eg	tRNA-Ser
				6	749653	749753	ENSRNA049566272	tRNA-Ser	tRNA	tRNA-Ser for anticodon GCU	trnascan_gene
				6	750253	750581	MGG_14290		protein_coding	Putative uncharacterized protein [Source:UniProtKB/TrEMBL%3BAcc:G4NG43]	broad_genes	G4NG43	G4NG43_MAGO7	unreviewed	Uncharacterized protein	MGG_14290	Magnaporthe oryzae (strain 70-15 / ATCC MYA-4617 / FGSC 8958) (Rice blast fungus) (Pyricularia oryzae)	73
				6	752170	756451	MGG_10879		protein_coding	Bifunctional P-450:NADPH-P450 reductase [Source:UniProtKB/TrEMBL%3BAcc:G4NG44]	broad_genes	G4NG44	G4NG44_MAGO7	unreviewed	Bifunctional cytochrome P450/NADPH--P450 reductase [Includes: Cytochrome P450 (EC 1.14.14.1); NADPH--cytochrome P450 reductase (EC 1.6.2.4)]	MGG_10879	Magnaporthe oryzae (strain 70-15 / ATCC MYA-4617 / FGSC 8958) (Rice blast fungus) (Pyricularia oryzae)	1089			aromatase activity [GO:0070330]; FMN binding [GO:0010181]; heme binding [GO:0020037]; iron ion binding [GO:0005506]; NADPH-hemoprotein reductase activity [GO:0003958]	aromatase activity [GO:0070330]; FMN binding [GO:0010181]; heme binding [GO:0020037]; iron ion binding [GO:0005506]; NADPH-hemoprotein reductase activity [GO:0003958]	GO:0003958; GO:0005506; GO:0010181; GO:0020037; GO:0070330
27	LTH_6_1068242	6	1068242	6	1019820	1022112	MGG_10422		protein_coding	Putative uncharacterized protein [Source:UniProtKB/TrEMBL%3BAcc:G4NGB5]	broad_genes	G4NGB5	G4NGB5_MAGO7	unreviewed	Uncharacterized protein	MGG_10422	Magnaporthe oryzae (strain 70-15 / ATCC MYA-4617 / FGSC 8958) (Rice blast fungus) (Pyricularia oryzae)	649		nucleus [GO:0005634]	nucleus [GO:0005634]; DNA-binding transcription factor activity, RNA polymerase II-specific [GO:0000981]; zinc ion binding [GO:0008270]	DNA-binding transcription factor activity, RNA polymerase II-specific [GO:0000981]; zinc ion binding [GO:0008270]	GO:0000981; GO:0005634; GO:0008270
				6	1022314	1024309	MGG_10423		protein_coding	Cellulase [Source:UniProtKB/TrEMBL%3BAcc:G4NGB6]	broad_genes	G4NGB6	G4NGB6_MAGO7	unreviewed	Cellulase	MGG_10423	Magnaporthe oryzae (strain 70-15 / ATCC MYA-4617 / FGSC 8958) (Rice blast fungus) (Pyricularia oryzae)	471	organic substance metabolic process [GO:0071704]		hydrolase activity, hydrolyzing O-glycosyl compounds [GO:0004553]; organic substance metabolic process [GO:0071704]	hydrolase activity, hydrolyzing O-glycosyl compounds [GO:0004553]	GO:0004553; GO:0071704
				6	1025185	1025762	MGG_10424		protein_coding	Putative uncharacterized protein [Source:UniProtKB/TrEMBL%3BAcc:G4NGB7]	broad_genes	G4NGB7	G4NGB7_MAGO7	unreviewed	DPBB_1 domain-containing protein	MGG_10424	Magnaporthe oryzae (strain 70-15 / ATCC MYA-4617 / FGSC 8958) (Rice blast fungus) (Pyricularia oryzae)	142
				6	1027564	1028603	MGG_10425		protein_coding	Putative uncharacterized protein [Source:UniProtKB/TrEMBL%3BAcc:G4NGB8]	broad_genes	G4NGB8	G4NGB8_MAGO7	unreviewed	Uncharacterized protein	MGG_10425	Magnaporthe oryzae (strain 70-15 / ATCC MYA-4617 / FGSC 8958) (Rice blast fungus) (Pyricularia oryzae)	206
				6	1029964	1032468	MGG_17625		protein_coding	Putative uncharacterized protein [Source:UniProtKB/TrEMBL%3BAcc:G4NGC3]	broad_genes	G4NGC3	G4NGC3_MAGO7	unreviewed	Uncharacterized protein	MGG_17625	Magnaporthe oryzae (strain 70-15 / ATCC MYA-4617 / FGSC 8958) (Rice blast fungus) (Pyricularia oryzae)	813
				6	1033257	1037711	MGG_10426		protein_coding	Putative uncharacterized protein [Source:UniProtKB/TrEMBL%3BAcc:G4NGC4]	broad_genes	G4NGC4	G4NGC4_MAGO7	unreviewed	Uncharacterized protein	MGG_10426	Magnaporthe oryzae (strain 70-15 / ATCC MYA-4617 / FGSC 8958) (Rice blast fungus) (Pyricularia oryzae)	1276
				6	1037749	1038709	MGG_10427		protein_coding	Putative uncharacterized protein [Source:UniProtKB/TrEMBL%3BAcc:G4NGB9]	broad_genes	G4NGB9	G4NGB9_MAGO7	unreviewed	Stress-response A/B barrel domain-containing protein	MGG_10427	Magnaporthe oryzae (strain 70-15 / ATCC MYA-4617 / FGSC 8958) (Rice blast fungus) (Pyricularia oryzae)	153		integral component of membrane [GO:0016021]	integral component of membrane [GO:0016021]		GO:0016021
				6	1039180	1041529	MGG_10428		protein_coding	Putative uncharacterized protein [Source:UniProtKB/TrEMBL%3BAcc:G4NGC0]	broad_genes	G4NGC0	G4NGC0_MAGO7	unreviewed	Uncharacterized protein	MGG_10428	Magnaporthe oryzae (strain 70-15 / ATCC MYA-4617 / FGSC 8958) (Rice blast fungus) (Pyricularia oryzae)	445
				6	1041621	1042176	MGG_17626		protein_coding	Putative uncharacterized protein [Source:UniProtKB/TrEMBL%3BAcc:G4NGC1]	broad_genes	G4NGC1	G4NGC1_MAGO7	unreviewed	Uncharacterized protein	MGG_17626	Magnaporthe oryzae (strain 70-15 / ATCC MYA-4617 / FGSC 8958) (Rice blast fungus) (Pyricularia oryzae)	76
				6	1042062	1044046	MGG_10429		protein_coding	Putative uncharacterized protein [Source:UniProtKB/TrEMBL%3BAcc:G4NGC2]	broad_genes	G4NGC2	G4NGC2_MAGO7	unreviewed	Uncharacterized protein	MGG_10429	Magnaporthe oryzae (strain 70-15 / ATCC MYA-4617 / FGSC 8958) (Rice blast fungus) (Pyricularia oryzae)	320		integral component of membrane [GO:0016021]	integral component of membrane [GO:0016021]		GO:0016021
				6	1044101	1045796	MGG_17627		protein_coding	Putative uncharacterized protein [Source:UniProtKB/TrEMBL%3BAcc:G4NGC5]	broad_genes	G4NGC5	G4NGC5_MAGO7	unreviewed	Uncharacterized protein	MGG_17627	Magnaporthe oryzae (strain 70-15 / ATCC MYA-4617 / FGSC 8958) (Rice blast fungus) (Pyricularia oryzae)	416		integral component of membrane [GO:0016021]	integral component of membrane [GO:0016021]		GO:0016021
				6	1047273	1050516	MGG_10431		protein_coding	Putative uncharacterized protein [Source:UniProtKB/TrEMBL%3BAcc:G4NGC6]	broad_genes	G4NGC6	G4NGC6_MAGO7	unreviewed	Uncharacterized protein	MGG_10431	Magnaporthe oryzae (strain 70-15 / ATCC MYA-4617 / FGSC 8958) (Rice blast fungus) (Pyricularia oryzae)	793	carbohydrate metabolic process [GO:0005975]		chitin binding [GO:0008061]; hydrolase activity, hydrolyzing O-glycosyl compounds [GO:0004553]; carbohydrate metabolic process [GO:0005975]	chitin binding [GO:0008061]; hydrolase activity, hydrolyzing O-glycosyl compounds [GO:0004553]	GO:0004553; GO:0005975; GO:0008061
				6	1051458	1052241	MGG_10432		protein_coding	Putative uncharacterized protein [Source:UniProtKB/TrEMBL%3BAcc:G4NGC7]	broad_genes	G4NGC7	G4NGC7_MAGO7	unreviewed	Uncharacterized protein	MGG_10432	Magnaporthe oryzae (strain 70-15 / ATCC MYA-4617 / FGSC 8958) (Rice blast fungus) (Pyricularia oryzae)	157
				6	1052718	1053305	MGG_17628		protein_coding	Putative uncharacterized protein [Source:UniProtKB/TrEMBL%3BAcc:G4NGC8]	broad_genes	G4NGC8	G4NGC8_MAGO7	unreviewed	Uncharacterized protein	MGG_17628	Magnaporthe oryzae (strain 70-15 / ATCC MYA-4617 / FGSC 8958) (Rice blast fungus) (Pyricularia oryzae)	195
				6	1055110	1055849	MGG_10434		protein_coding	Putative uncharacterized protein [Source:UniProtKB/TrEMBL%3BAcc:G4NGC9]	broad_genes	G4NGC9	G4NGC9_MAGO7	unreviewed	Uncharacterized protein	MGG_10434	Magnaporthe oryzae (strain 70-15 / ATCC MYA-4617 / FGSC 8958) (Rice blast fungus) (Pyricularia oryzae)	175
				6	1056678	1057898	MGG_10435		protein_coding	Putative uncharacterized protein [Source:UniProtKB/TrEMBL%3BAcc:G4NGD0]	broad_genes	G4NGD0	G4NGD0_MAGO7	unreviewed	Uncharacterized protein	MGG_10435	Magnaporthe oryzae (strain 70-15 / ATCC MYA-4617 / FGSC 8958) (Rice blast fungus) (Pyricularia oryzae)	406
				6	1076689	1078251	MGG_04349		protein_coding	Cytochrome P450 [Source:UniProtKB/TrEMBL%3BAcc:G4NGD1]	broad_genes	G4NGD1	G4NGD1_MAGO7	unreviewed	Cytochrome P450	MGG_04349	Magnaporthe oryzae (strain 70-15 / ATCC MYA-4617 / FGSC 8958) (Rice blast fungus) (Pyricularia oryzae)	520		integral component of membrane [GO:0016021]	integral component of membrane [GO:0016021]; heme binding [GO:0020037]; iron ion binding [GO:0005506]; monooxygenase activity [GO:0004497]; oxidoreductase activity, acting on paired donors, with incorporation or reduction of molecular oxygen [GO:0016705]	heme binding [GO:0020037]; iron ion binding [GO:0005506]; monooxygenase activity [GO:0004497]; oxidoreductase activity, acting on paired donors, with incorporation or reduction of molecular oxygen [GO:0016705]	GO:0004497; GO:0005506; GO:0016021; GO:0016705; GO:0020037
				6	1079638	1080722	MGG_04348		protein_coding	Pectate lyase [Source:UniProtKB/TrEMBL%3BAcc:G4NGD2]	broad_genes	G4NGD2	G4NGD2_MAGO7	unreviewed	Pectate lyase	MGG_04348	Magnaporthe oryzae (strain 70-15 / ATCC MYA-4617 / FGSC 8958) (Rice blast fungus) (Pyricularia oryzae)	323	polysaccharide catabolic process [GO:0000272]	extracellular region [GO:0005576]	extracellular region [GO:0005576]; lyase activity [GO:0016829]; polysaccharide catabolic process [GO:0000272]	lyase activity [GO:0016829]	GO:0000272; GO:0005576; GO:0016829
				6	1082252	1082878	MGG_17629		protein_coding	Putative uncharacterized protein [Source:UniProtKB/TrEMBL%3BAcc:G4NGD3]	broad_genes	G4NGD3	G4NGD3_MAGO7	unreviewed	Uncharacterized protein	MGG_17629	Magnaporthe oryzae (strain 70-15 / ATCC MYA-4617 / FGSC 8958) (Rice blast fungus) (Pyricularia oryzae)	121
				6	1085117	1086736	MGG_04346	ERG6	protein_coding	Sterol 24-C-methyltransferase [Source:UniProtKB/Swiss-Prot%3BAcc:Q5EN22]	broad_genes	Q5EN22
				6	1087217	1089491	MGG_04345		protein_coding	Cytochrome P450 17A1 [Source:UniProtKB/TrEMBL%3BAcc:G4NGD5]	broad_genes	G4NGD5	G4NGD5_MAGO7	unreviewed	Cytochrome P450 17A1	MGG_04345	Magnaporthe oryzae (strain 70-15 / ATCC MYA-4617 / FGSC 8958) (Rice blast fungus) (Pyricularia oryzae)	530			heme binding [GO:0020037]; iron ion binding [GO:0005506]; monooxygenase activity [GO:0004497]; oxidoreductase activity, acting on paired donors, with incorporation or reduction of molecular oxygen [GO:0016705]	heme binding [GO:0020037]; iron ion binding [GO:0005506]; monooxygenase activity [GO:0004497]; oxidoreductase activity, acting on paired donors, with incorporation or reduction of molecular oxygen [GO:0016705]	GO:0004497; GO:0005506; GO:0016705; GO:0020037
				6	1090609	1091264	MGG_17630		protein_coding	Putative uncharacterized protein [Source:UniProtKB/TrEMBL%3BAcc:G4NGD6]	broad_genes	G4NGD6	G4NGD6_MAGO7	unreviewed	Uncharacterized protein	MGG_17630	Magnaporthe oryzae (strain 70-15 / ATCC MYA-4617 / FGSC 8958) (Rice blast fungus) (Pyricularia oryzae)	55
				6	1091257	1093935	MGG_04344		protein_coding	Putative uncharacterized protein [Source:UniProtKB/TrEMBL%3BAcc:G4NGD7]	broad_genes	G4NGD7	G4NGD7_MAGO7	unreviewed	Uncharacterized protein	MGG_04344	Magnaporthe oryzae (strain 70-15 / ATCC MYA-4617 / FGSC 8958) (Rice blast fungus) (Pyricularia oryzae)	562
				6	1095556	1097116	MGG_04343		protein_coding	Extradiol ring-cleavage dioxygenase [Source:UniProtKB/TrEMBL%3BAcc:G4NGD8]	broad_genes	G4NGD8	G4NGD8_MAGO7	unreviewed	Extradiol ring-cleavage dioxygenase	MGG_04343	Magnaporthe oryzae (strain 70-15 / ATCC MYA-4617 / FGSC 8958) (Rice blast fungus) (Pyricularia oryzae)	341	cellular aromatic compound metabolic process [GO:0006725]		dioxygenase activity [GO:0051213]; ferrous iron binding [GO:0008198]; oxidoreductase activity, acting on single donors with incorporation of molecular oxygen [GO:0016701]; zinc ion binding [GO:0008270]; cellular aromatic compound metabolic process [GO:0006725]	dioxygenase activity [GO:0051213]; ferrous iron binding [GO:0008198]; oxidoreductase activity, acting on single donors with incorporation of molecular oxygen [GO:0016701]; zinc ion binding [GO:0008270]	GO:0006725; GO:0008198; GO:0008270; GO:0016701; GO:0051213
				6	1096731	1103858	MGG_04342		protein_coding	Proteasome activator subunit 4 [Source:UniProtKB/TrEMBL%3BAcc:G4NGD9]	broad_genes	G4NGD9	G4NGD9_MAGO7	unreviewed	Proteasome activator subunit 4	MGG_04342	Magnaporthe oryzae (strain 70-15 / ATCC MYA-4617 / FGSC 8958) (Rice blast fungus) (Pyricularia oryzae)	1849	DNA repair [GO:0006281]	proteasome complex [GO:0000502]	proteasome complex [GO:0000502]; lysine-acetylated histone binding [GO:0070577]; peptidase activator activity [GO:0016504]; proteasome binding [GO:0070628]; DNA repair [GO:0006281]	lysine-acetylated histone binding [GO:0070577]; peptidase activator activity [GO:0016504]; proteasome binding [GO:0070628]	GO:0000502; GO:0006281; GO:0016504; GO:0070577; GO:0070628
				6	1105124	1106325	MGG_04341		protein_coding	Putative uncharacterized protein [Source:UniProtKB/TrEMBL%3BAcc:G4NGE0]	broad_genes	G4NGE0	G4NGE0_MAGO7	unreviewed	Uncharacterized protein	MGG_04341	Magnaporthe oryzae (strain 70-15 / ATCC MYA-4617 / FGSC 8958) (Rice blast fungus) (Pyricularia oryzae)	147
				6	1106703	1109437	MGG_04340		protein_coding	Putative uncharacterized protein [Source:UniProtKB/TrEMBL%3BAcc:G4NGE1]	broad_genes	G4NGE1	G4NGE1_MAGO7	unreviewed	Uncharacterized protein	MGG_04340	Magnaporthe oryzae (strain 70-15 / ATCC MYA-4617 / FGSC 8958) (Rice blast fungus) (Pyricularia oryzae)	480			acyltransferase activity, transferring groups other than amino-acyl groups [GO:0016747]	acyltransferase activity, transferring groups other than amino-acyl groups [GO:0016747]	GO:0016747
				6	1109231	1111439	MGG_04339		protein_coding	Putative uncharacterized protein [Source:UniProtKB/TrEMBL%3BAcc:G4NGE2]	broad_genes	G4NGE2	G4NGE2_MAGO7	unreviewed	Uncharacterized protein	MGG_04339	Magnaporthe oryzae (strain 70-15 / ATCC MYA-4617 / FGSC 8958) (Rice blast fungus) (Pyricularia oryzae)	451		integral component of membrane [GO:0016021]	integral component of membrane [GO:0016021]		GO:0016021
				6	1114958	1115823	MGG_17631		protein_coding	Putative uncharacterized protein [Source:UniProtKB/TrEMBL%3BAcc:G4NGE3]	broad_genes	G4NGE3	G4NGE3_MAGO7	unreviewed	Uncharacterized protein	MGG_17631	Magnaporthe oryzae (strain 70-15 / ATCC MYA-4617 / FGSC 8958) (Rice blast fungus) (Pyricularia oryzae)	65
				6	1116078	1124544	MGG_12214		protein_coding	Fatty acid synthase S-acetyltransferase [Source:UniProtKB/TrEMBL%3BAcc:G4NGE4]	broad_genes	G4NGE4	G4NGE4_MAGO7	unreviewed	Fatty acid synthase S-acetyltransferase	MGG_12214	Magnaporthe oryzae (strain 70-15 / ATCC MYA-4617 / FGSC 8958) (Rice blast fungus) (Pyricularia oryzae)	2625	fatty acid biosynthetic process [GO:0006633]; methylation [GO:0032259]		3-oxoacyl-[acyl-carrier-protein] synthase activity [GO:0004315]; methyltransferase activity [GO:0008168]; oxidoreductase activity [GO:0016491]; phosphopantetheine binding [GO:0031177]; fatty acid biosynthetic process [GO:0006633]; methylation [GO:0032259]	3-oxoacyl-[acyl-carrier-protein] synthase activity [GO:0004315]; methyltransferase activity [GO:0008168]; oxidoreductase activity [GO:0016491]; phosphopantetheine binding [GO:0031177]	GO:0004315; GO:0006633; GO:0008168; GO:0016491; GO:0031177; GO:0032259
28	IRBLb-B_6_3022354	6	3022354	6	2965599	2978891	MGG_03810		protein_coding	Polyketide synthase [Source:UniProtKB/TrEMBL%3BAcc:G4NHK7]	broad_genes	G4NHK7	G4NHK7_MAGO7	unreviewed	Polyketide synthase	MGG_03810	Magnaporthe oryzae (strain 70-15 / ATCC MYA-4617 / FGSC 8958) (Rice blast fungus) (Pyricularia oryzae)	4255	methylation [GO:0032259]		acyltransferase activity [GO:0016746]; ligase activity [GO:0016874]; methyltransferase activity [GO:0008168]; oxidoreductase activity [GO:0016491]; phosphopantetheine binding [GO:0031177]; methylation [GO:0032259]	acyltransferase activity [GO:0016746]; ligase activity [GO:0016874]; methyltransferase activity [GO:0008168]; oxidoreductase activity [GO:0016491]; phosphopantetheine binding [GO:0031177]	GO:0008168; GO:0016491; GO:0016746; GO:0016874; GO:0031177; GO:0032259
				6	2978927	2979481	MGG_17748		pseudogene		broad_genes
				6	2980800	2981181	MGG_17749		protein_coding	Putative uncharacterized protein [Source:UniProtKB/TrEMBL%3BAcc:G4NHK9]	broad_genes	G4NHK9	G4NHK9_MAGO7	unreviewed	Uncharacterized protein	MGG_17749	Magnaporthe oryzae (strain 70-15 / ATCC MYA-4617 / FGSC 8958) (Rice blast fungus) (Pyricularia oryzae)	58
				6	2983513	2984246	MGG_03808		protein_coding	Putative uncharacterized protein [Source:UniProtKB/TrEMBL%3BAcc:G4NHL0]	broad_genes	G4NHL0	G4NHL0_MAGO7	unreviewed	Aspzincin_M35 domain-containing protein	MGG_03808	Magnaporthe oryzae (strain 70-15 / ATCC MYA-4617 / FGSC 8958) (Rice blast fungus) (Pyricularia oryzae)	168			metal ion binding [GO:0046872]; metalloendopeptidase activity [GO:0004222]	metal ion binding [GO:0046872]; metalloendopeptidase activity [GO:0004222]	GO:0004222; GO:0046872
				6	2985150	2985662	MGG_12069		protein_coding	Putative uncharacterized protein [Source:UniProtKB/TrEMBL%3BAcc:G4NHL1]	broad_genes	G4NHL1	G4NHL1_MAGO7	unreviewed	Uncharacterized protein	MGG_12069	Magnaporthe oryzae (strain 70-15 / ATCC MYA-4617 / FGSC 8958) (Rice blast fungus) (Pyricularia oryzae)	170
				6	2986065	2987705	MGG_03807		protein_coding	Putative uncharacterized protein [Source:UniProtKB/TrEMBL%3BAcc:G4NHL2]	broad_genes	G4NHL2	G4NHL2_MAGO7	unreviewed	Uncharacterized protein	MGG_03807	Magnaporthe oryzae (strain 70-15 / ATCC MYA-4617 / FGSC 8958) (Rice blast fungus) (Pyricularia oryzae)	227		integral component of membrane [GO:0016021]	integral component of membrane [GO:0016021]		GO:0016021
				6	2988725	2989831	MGG_03806		protein_coding	Putative uncharacterized protein [Source:UniProtKB/TrEMBL%3BAcc:G4NHL3]	broad_genes	G4NHL3	G4NHL3_MAGO7	unreviewed	EF-hand domain-containing protein	MGG_03806	Magnaporthe oryzae (strain 70-15 / ATCC MYA-4617 / FGSC 8958) (Rice blast fungus) (Pyricularia oryzae)	161			calcium ion binding [GO:0005509]	calcium ion binding [GO:0005509]	GO:0005509
				6	2990847	2991197	MGG_03805		protein_coding	Putative uncharacterized protein [Source:UniProtKB/TrEMBL%3BAcc:G4NHL4]	broad_genes	G4NHL4	G4NHL4_MAGO7	unreviewed	Uncharacterized protein	MGG_03805	Magnaporthe oryzae (strain 70-15 / ATCC MYA-4617 / FGSC 8958) (Rice blast fungus) (Pyricularia oryzae)	116
				6	2993576	2995162	MGG_12068		protein_coding	Putative uncharacterized protein [Source:UniProtKB/TrEMBL%3BAcc:G4NHL5]	broad_genes	G4NHL5	G4NHL5_MAGO7	unreviewed	Uncharacterized protein	MGG_12068	Magnaporthe oryzae (strain 70-15 / ATCC MYA-4617 / FGSC 8958) (Rice blast fungus) (Pyricularia oryzae)	472
				6	3010028	3011999	MGG_17750		protein_coding	Putative uncharacterized protein [Source:UniProtKB/TrEMBL%3BAcc:G4NHL6]	broad_genes	G4NHL6	G4NHL6_MAGO7	unreviewed	SET domain-containing protein	MGG_17750	Magnaporthe oryzae (strain 70-15 / ATCC MYA-4617 / FGSC 8958) (Rice blast fungus) (Pyricularia oryzae)	551
				6	3014698	3015105	MGG_17751		protein_coding	Putative uncharacterized protein [Source:UniProtKB/TrEMBL%3BAcc:G4NHL7]	broad_genes	G4NHL7	G4NHL7_MAGO7	unreviewed	Uncharacterized protein	MGG_17751	Magnaporthe oryzae (strain 70-15 / ATCC MYA-4617 / FGSC 8958) (Rice blast fungus) (Pyricularia oryzae)	76
				6	3017576	3019023	MGG_03800		protein_coding	Putative uncharacterized protein [Source:UniProtKB/TrEMBL%3BAcc:G4NHL8]	broad_genes	G4NHL8	G4NHL8_MAGO7	unreviewed	GED domain-containing protein	MGG_03800	Magnaporthe oryzae (strain 70-15 / ATCC MYA-4617 / FGSC 8958) (Rice blast fungus) (Pyricularia oryzae)	224
				6	3021168	3021640	MGG_17752		protein_coding	Putative uncharacterized protein [Source:UniProtKB/TrEMBL%3BAcc:G4NHL9]	broad_genes	G4NHL9	G4NHL9_MAGO7	unreviewed	Uncharacterized protein	MGG_17752	Magnaporthe oryzae (strain 70-15 / ATCC MYA-4617 / FGSC 8958) (Rice blast fungus) (Pyricularia oryzae)	114
				6	3024957	3027123	MGG_17753		protein_coding	Putative uncharacterized protein [Source:UniProtKB/TrEMBL%3BAcc:G4NHM0]	broad_genes	G4NHM0	G4NHM0_MAGO7	unreviewed	NACHT domain-containing protein	MGG_17753	Magnaporthe oryzae (strain 70-15 / ATCC MYA-4617 / FGSC 8958) (Rice blast fungus) (Pyricularia oryzae)	460
				6	3034433	3035797	MGG_03794		protein_coding	Putative uncharacterized protein [Source:UniProtKB/TrEMBL%3BAcc:G4NHM1]	broad_genes	G4NHM1	G4NHM1_MAGO7	unreviewed	Uncharacterized protein	MGG_03794	Magnaporthe oryzae (strain 70-15 / ATCC MYA-4617 / FGSC 8958) (Rice blast fungus) (Pyricularia oryzae)	332		integral component of membrane [GO:0016021]	integral component of membrane [GO:0016021]		GO:0016021
				6	3036509	3036733	MGG_17754		protein_coding	Putative uncharacterized protein [Source:UniProtKB/TrEMBL%3BAcc:G4NHM2]	broad_genes	G4NHM2	G4NHM2_MAGO7	unreviewed	Uncharacterized protein	MGG_17754	Magnaporthe oryzae (strain 70-15 / ATCC MYA-4617 / FGSC 8958) (Rice blast fungus) (Pyricularia oryzae)	53		integral component of membrane [GO:0016021]	integral component of membrane [GO:0016021]		GO:0016021
				6	3038687	3039780	MGG_03793		protein_coding	2%2C3-dihydroxybenzoic acid decarboxylase [Source:UniProtKB/TrEMBL%3BAcc:G4NHM3]	broad_genes	G4NHM3	G4NHM3_MAGO7	unreviewed	2,3-dihydroxybenzoic acid decarboxylase	MGG_03793	Magnaporthe oryzae (strain 70-15 / ATCC MYA-4617 / FGSC 8958) (Rice blast fungus) (Pyricularia oryzae)	339			carboxy-lyase activity [GO:0016831]; hydrolase activity [GO:0016787]	carboxy-lyase activity [GO:0016831]; hydrolase activity [GO:0016787]	GO:0016787; GO:0016831
				6	3040872	3041886	MGG_03792		protein_coding	Putative uncharacterized protein [Source:UniProtKB/TrEMBL%3BAcc:G4NHM4]	broad_genes	G4NHM4	G4NHM4_MAGO7	unreviewed	Cutinase (EC 3.1.1.74)	MGG_03792	Magnaporthe oryzae (strain 70-15 / ATCC MYA-4617 / FGSC 8958) (Rice blast fungus) (Pyricularia oryzae)	264		extracellular region [GO:0005576]	extracellular region [GO:0005576]; cutinase activity [GO:0050525]	cutinase activity [GO:0050525]	GO:0005576; GO:0050525
				6	3043552	3044304	MGG_03791		protein_coding	Putative uncharacterized protein [Source:UniProtKB/TrEMBL%3BAcc:G4NHM5]	broad_genes	G4NHM5	G4NHM5_MAGO7	unreviewed	Uncharacterized protein	MGG_03791	Magnaporthe oryzae (strain 70-15 / ATCC MYA-4617 / FGSC 8958) (Rice blast fungus) (Pyricularia oryzae)	129			calcium ion binding [GO:0005509]	calcium ion binding [GO:0005509]	GO:0005509
				6	3044841	3045857	MGG_17755		protein_coding	Putative uncharacterized protein [Source:UniProtKB/TrEMBL%3BAcc:G4NHM6]	broad_genes	G4NHM6	G4NHM6_MAGO7	unreviewed	Uncharacterized protein	MGG_17755	Magnaporthe oryzae (strain 70-15 / ATCC MYA-4617 / FGSC 8958) (Rice blast fungus) (Pyricularia oryzae)	126
				6	3056241	3056546	MGG_17756		protein_coding	Putative uncharacterized protein [Source:UniProtKB/TrEMBL%3BAcc:G4NHM7]	broad_genes	G4NHM7	G4NHM7_MAGO7	unreviewed	Uncharacterized protein	MGG_17756	Magnaporthe oryzae (strain 70-15 / ATCC MYA-4617 / FGSC 8958) (Rice blast fungus) (Pyricularia oryzae)	71
				6	3063934	3064589	MGG_17757		protein_coding	Putative uncharacterized protein [Source:UniProtKB/TrEMBL%3BAcc:G4NHM8]	broad_genes	G4NHM8	G4NHM8_MAGO7	unreviewed	Uncharacterized protein	MGG_17757	Magnaporthe oryzae (strain 70-15 / ATCC MYA-4617 / FGSC 8958) (Rice blast fungus) (Pyricularia oryzae)	174
				6	3068821	3069418	MGG_17758		protein_coding	Putative uncharacterized protein [Source:UniProtKB/TrEMBL%3BAcc:G4NHM9]	broad_genes	G4NHM9	G4NHM9_MAGO7	unreviewed	Aspzincin_M35 domain-containing protein	MGG_17758	Magnaporthe oryzae (strain 70-15 / ATCC MYA-4617 / FGSC 8958) (Rice blast fungus) (Pyricularia oryzae)	151			metal ion binding [GO:0046872]; metalloendopeptidase activity [GO:0004222]		GO:0004222; GO:0046872
				6	3070414	3071428	MGG_03785		protein_coding	Putative uncharacterized protein [Source:UniProtKB/TrEMBL%3BAcc:G4NHN0]	broad_genes	G4NHN0	G4NHN0_MAGO7	unreviewed	Uncharacterized protein	MGG_03785	Magnaporthe oryzae (strain 70-15 / ATCC MYA-4617 / FGSC 8958) (Rice blast fungus) (Pyricularia oryzae)	243
				6	3071990	3073717	MGG_03784		protein_coding	Putative uncharacterized protein [Source:UniProtKB/TrEMBL%3BAcc:G4NHN1]	broad_genes	G4NHN1	G4NHN1_MAGO7	unreviewed	Uncharacterized protein	MGG_03784	Magnaporthe oryzae (strain 70-15 / ATCC MYA-4617 / FGSC 8958) (Rice blast fungus) (Pyricularia oryzae)	551			chitin binding [GO:0008061]	chitin binding [GO:0008061]	GO:0008061
